# Supplementary material for: Epigenomics and Single-Cell Sequencing Define a Developmental Hierarchy in Langerhans Cell Histiocytosis
Source: Oxford University Press journal article supplement (doi:10.1158/2159-8290.cd-19-0138), 2019-07-25
Supplement: 21598290cd190138-sup-supplementarytable2.xlsx [file 21598290cd190138-sup-supplementarytable2.xlsx]

## Sheet: LCH vs immune cells (Fig. 2)
Supplementary Table 2.a
Differentially expressed genes between LCH cells and non-LCH immune cells
Comparison	Higher in…	Lower in…	Gene symbol	Average logFC	P-value	FDR-adjusted P-value
LCH cells vs B cells	LCH cells	B cells	C15orf48	1.62184	1.10267e-07	0.00207809
LCH cells vs B cells	LCH cells	B cells	S100A4	1.40706	3.02698e-09	5.70465e-05
LCH cells vs B cells	LCH cells	B cells	LMNA	1.29451	5.11618e-10	9.64196e-06
LCH cells vs B cells	LCH cells	B cells	LGALS1	1.28409	5.32088e-08	0.00100277
LCH cells vs B cells	LCH cells	B cells	TIMP1	1.27433	6.10232e-08	0.00115004
LCH cells vs B cells	LCH cells	B cells	FCER1A	1.21585	2.01675e-07	0.00380077
LCH cells vs B cells	LCH cells	B cells	NFKBIA	1.20658	6.03365e-08	0.0011371
LCH cells vs B cells	LCH cells	B cells	CD1E	1.19101	1.84222e-07	0.00347185
LCH cells vs B cells	LCH cells	B cells	CD207	1.08638	1.32989e-07	0.00250631
LCH cells vs B cells	LCH cells	B cells	VIM	1.01243	1.70695e-07	0.00321691
LCH cells vs B cells	LCH cells	B cells	PRDX1	0.969266	1.78247e-07	0.00335924
LCH cells vs B cells	LCH cells	B cells	S100A11	0.956169	2.18443e-08	0.000411678
LCH cells vs B cells	B cells	LCH cells	STAP1	-0.29631	6.98567e-30	1.31652e-25
LCH cells vs B cells	B cells	LCH cells	ICAM2	-0.331208	4.40158e-11	8.29522e-07
LCH cells vs B cells	B cells	LCH cells	BTN3A2	-0.353331	1.13151e-07	0.00213244
LCH cells vs B cells	B cells	LCH cells	SSPN	-0.362658	1.16311e-13	2.19199e-09
LCH cells vs B cells	B cells	LCH cells	SEL1L3	-0.423149	2.18165e-10	4.11154e-06
LCH cells vs B cells	B cells	LCH cells	ADD3	-0.464245	2.76388e-09	5.2088e-05
LCH cells vs B cells	B cells	LCH cells	TNFRSF17	-0.467993	4.12003e-28	7.76461e-24
LCH cells vs B cells	B cells	LCH cells	RIC3	-0.473563	3.17823e-10	5.98969e-06
LCH cells vs B cells	B cells	LCH cells	BCL11A	-0.476878	4.55084e-22	8.57651e-18
LCH cells vs B cells	B cells	LCH cells	POU2AF1	-0.494013	3.86231e-74	7.2789e-70
LCH cells vs B cells	B cells	LCH cells	FCRL5	-0.516039	7.6835e-40	1.44803e-35
LCH cells vs B cells	B cells	LCH cells	S1PR4	-0.533162	1.00417e-18	1.89246e-14
LCH cells vs B cells	B cells	LCH cells	GNG7	-0.553685	2.5437e-13	4.79385e-09
LCH cells vs B cells	B cells	LCH cells	TSPAN3	-0.572862	1.58857e-07	0.00299381
LCH cells vs B cells	B cells	LCH cells	FCRL2	-0.577749	1.32372e-36	2.49468e-32
LCH cells vs B cells	B cells	LCH cells	AIM2	-0.582646	1.83278e-14	3.45406e-10
LCH cells vs B cells	B cells	LCH cells	RALGPS2	-0.593807	5.59862e-21	1.05512e-16
LCH cells vs B cells	B cells	LCH cells	TUBA4A	-0.614791	1.97608e-28	3.72413e-24
LCH cells vs B cells	B cells	LCH cells	ITM2C	-0.616783	3.67573e-14	6.92728e-10
LCH cells vs B cells	B cells	LCH cells	TNFRSF13B	-0.618428	1.49894e-46	2.82491e-42
LCH cells vs B cells	B cells	LCH cells	TBC1D10C	-0.675438	8.21773e-10	1.54871e-05
LCH cells vs B cells	B cells	LCH cells	PDLIM1	-0.715862	6.99904e-26	1.31904e-21
LCH cells vs B cells	B cells	LCH cells	GYPC	-0.728919	3.79207e-15	7.14654e-11
LCH cells vs B cells	B cells	LCH cells	CD22	-0.776035	2.02961e-47	3.825e-43
LCH cells vs B cells	B cells	LCH cells	CD19	-0.800693	3.41382e-21	6.43369e-17
LCH cells vs B cells	B cells	LCH cells	IRF8	-0.882102	7.8968e-11	1.48823e-06
LCH cells vs B cells	B cells	LCH cells	TRAF3IP3	-0.933108	4.70596e-32	8.86885e-28
LCH cells vs B cells	B cells	LCH cells	IGHG2	-0.933746	9.61946e-43	1.81288e-38
LCH cells vs B cells	B cells	LCH cells	AL928768.3	-0.973956	1.91383e-69	3.60681e-65
LCH cells vs B cells	B cells	LCH cells	LBH	-1.01135	2.21777e-09	4.17961e-05
LCH cells vs B cells	B cells	LCH cells	LIMD2	-1.02279	2.26946e-08	0.000427702
LCH cells vs B cells	B cells	LCH cells	FCRLA	-1.02521	5.01211e-132	9.44581e-128
LCH cells vs B cells	B cells	LCH cells	CD27	-1.03421	1.54756e-20	2.91653e-16
LCH cells vs B cells	B cells	LCH cells	ISG20	-1.14735	1.32173e-10	2.49093e-06
LCH cells vs B cells	B cells	LCH cells	SELL	-1.45656	4.55342e-23	8.58138e-19
LCH cells vs B cells	B cells	LCH cells	CD79B	-1.54065	1.97623e-41	3.7244e-37
LCH cells vs B cells	B cells	LCH cells	MZB1	-1.77023	1.77565e-19	3.34639e-15
LCH cells vs B cells	B cells	LCH cells	IGHG4	-1.78664	1.50314e-08	0.000283282
LCH cells vs B cells	B cells	LCH cells	CD79A	-1.87109	1.99257e-79	3.7552e-75
LCH cells vs B cells	B cells	LCH cells	IGHGP	-1.9354	3.40661e-09	6.42009e-05
LCH cells vs B cells	B cells	LCH cells	MS4A1	-2.39868	2.08177e-26	3.9233e-22
LCH cells vs B cells	B cells	LCH cells	IGHG3	-2.66659	8.78996e-11	1.65656e-06
LCH cells vs B cells	B cells	LCH cells	IGHG1	-2.93048	2.4741e-11	4.6627e-07
LCH cells vs B cells	B cells	LCH cells	IGLC3	-4.01935	9.83799e-11	1.85407e-06
LCH cells vs B cells	B cells	LCH cells	IGKC	-4.04619	5.9638e-09	0.000112394
LCH cells vs pDCs	LCH cells	pDC	C15orf48	2.22718	2.06613e-80	3.89384e-76
LCH cells vs pDCs	LCH cells	pDC	HLA-DQB2	1.74216	6.39876e-57	1.20591e-52
LCH cells vs pDCs	LCH cells	pDC	TACSTD2	1.67868	7.60642e-67	1.43351e-62
LCH cells vs pDCs	LCH cells	pDC	S100A4	1.64318	6.15864e-84	1.16066e-79
LCH cells vs pDCs	LCH cells	pDC	FCER1A	1.59605	3.4448e-80	6.49208e-76
LCH cells vs pDCs	LCH cells	pDC	CD1A	1.57173	9.61933e-75	1.81286e-70
LCH cells vs pDCs	LCH cells	pDC	LGALS1	1.53338	1.07563e-80	2.02712e-76
LCH cells vs pDCs	LCH cells	pDC	MMP9	1.48803	5.13684e-56	9.68089e-52
LCH cells vs pDCs	LCH cells	pDC	CD207	1.48256	3.80358e-37	7.16823e-33
LCH cells vs pDCs	LCH cells	pDC	CKLF	1.47309	3.98562e-78	7.51131e-74
LCH cells vs pDCs	LCH cells	pDC	PPM1N	1.435	1.0377e-59	1.95565e-55
LCH cells vs pDCs	LCH cells	pDC	S100B	1.41299	2.1475e-31	4.04718e-27
LCH cells vs pDCs	LCH cells	pDC	TIMP1	1.40624	4.77789e-66	9.00442e-62
LCH cells vs pDCs	LCH cells	pDC	AIF1	1.40206	1.18495e-76	2.23315e-72
LCH cells vs pDCs	LCH cells	pDC	FCGBP	1.39167	4.99716e-60	9.41764e-56
LCH cells vs pDCs	LCH cells	pDC	LST1	1.33206	1.03788e-76	1.95599e-72
LCH cells vs pDCs	LCH cells	pDC	HPGDS	1.31895	9.64618e-54	1.81792e-49
LCH cells vs pDCs	LCH cells	pDC	CD1E	1.30437	5.11454e-63	9.63886e-59
LCH cells vs pDCs	LCH cells	pDC	IL1B	1.29236	5.82567e-22	1.09791e-17
LCH cells vs pDCs	LCH cells	pDC	PLEK2	1.26239	6.10177e-56	1.14994e-51
LCH cells vs pDCs	LCH cells	pDC	CA2	1.25573	1.13309e-47	2.13543e-43
LCH cells vs pDCs	LCH cells	pDC	PKIB	1.22292	9.70151e-60	1.82835e-55
LCH cells vs pDCs	LCH cells	pDC	PLAUR	1.22014	2.49137e-49	4.69523e-45
LCH cells vs pDCs	LCH cells	pDC	SPI1	1.2181	5.06665e-75	9.5486e-71
LCH cells vs pDCs	LCH cells	pDC	CD1C	1.20899	7.00357e-43	1.31989e-38
LCH cells vs pDCs	LCH cells	pDC	HLA-DQA2	1.19984	4.51707e-17	8.51286e-13
LCH cells vs pDCs	LCH cells	pDC	LMNA	1.1892	3.28631e-57	6.19339e-53
LCH cells vs pDCs	LCH cells	pDC	RGS16	1.18899	7.65073e-18	1.44186e-13
LCH cells vs pDCs	LCH cells	pDC	CST3	1.1838	8.61235e-64	1.62308e-59
LCH cells vs pDCs	LCH cells	pDC	NDRG2	1.18103	4.86488e-61	9.16835e-57
LCH cells vs pDCs	LCH cells	pDC	PKM	1.1571	1.36287e-65	2.56846e-61
LCH cells vs pDCs	LCH cells	pDC	YWHAH	1.12835	1.88534e-27	3.55312e-23
LCH cells vs pDCs	LCH cells	pDC	TYROBP	1.09409	1.25241e-74	2.36029e-70
LCH cells vs pDCs	LCH cells	pDC	CPVL	1.09367	2.27096e-40	4.27984e-36
LCH cells vs pDCs	LCH cells	pDC	ITGB2	1.05226	1.22742e-56	2.31319e-52
LCH cells vs pDCs	LCH cells	pDC	SH3BGRL3	1.04934	1.81545e-75	3.42141e-71
LCH cells vs pDCs	LCH cells	pDC	HLA-DRB1	1.04474	1.13229e-69	2.13391e-65
LCH cells vs pDCs	LCH cells	pDC	S100A10	1.04193	1.83275e-56	3.454e-52
LCH cells vs pDCs	LCH cells	pDC	TNF	1.03726	1.22482e-40	2.3083e-36
LCH cells vs pDCs	LCH cells	pDC	HLA-DQA1	1.01062	3.58285e-73	6.75223e-69
LCH cells vs pDCs	LCH cells	pDC	CLEC10A	0.995588	1.20483e-35	2.27062e-31
LCH cells vs pDCs	LCH cells	pDC	PRDX1	0.995029	1.00563e-54	1.8952e-50
LCH cells vs pDCs	LCH cells	pDC	HLA-DPB1	0.994311	2.02534e-68	3.81696e-64
LCH cells vs pDCs	LCH cells	pDC	HLA-DPA1	0.991969	1.60562e-72	3.02594e-68
LCH cells vs pDCs	LCH cells	pDC	SLC16A3	0.963594	2.42426e-27	4.56876e-23
LCH cells vs pDCs	LCH cells	pDC	FCER1G	0.953488	9.19843e-56	1.73354e-51
LCH cells vs pDCs	LCH cells	pDC	S100A11	0.947308	4.31864e-67	8.13891e-63
LCH cells vs pDCs	LCH cells	pDC	CTNNBIP1	0.937295	1.14594e-40	2.15964e-36
LCH cells vs pDCs	LCH cells	pDC	GAPDH	0.936059	5.49194e-43	1.03501e-38
LCH cells vs pDCs	LCH cells	pDC	MMP12	0.917641	4.36568e-11	8.22757e-07
LCH cells vs pDCs	LCH cells	pDC	ANXA1	0.916816	2.19875e-26	4.14377e-22
LCH cells vs pDCs	LCH cells	pDC	SPINK2	0.91643	2.55549e-09	4.81608e-05
LCH cells vs pDCs	LCH cells	pDC	VASP	0.914742	1.76072e-46	3.31825e-42
LCH cells vs pDCs	LCH cells	pDC	DBI	0.909311	8.66345e-43	1.63271e-38
LCH cells vs pDCs	LCH cells	pDC	CST6	0.903842	2.27821e-16	4.29352e-12
LCH cells vs pDCs	LCH cells	pDC	RGS10	0.902102	6.17296e-59	1.16336e-54
LCH cells vs pDCs	LCH cells	pDC	GSN	0.89669	7.31337e-53	1.37828e-48
LCH cells vs pDCs	LCH cells	pDC	RGCC	0.893754	4.31825e-09	8.13818e-05
LCH cells vs pDCs	LCH cells	pDC	CD86	0.893638	1.08529e-50	2.04534e-46
LCH cells vs pDCs	LCH cells	pDC	LDHA	0.884772	1.35889e-24	2.56096e-20
LCH cells vs pDCs	LCH cells	pDC	TPI1	0.871393	9.15756e-45	1.72583e-40
LCH cells vs pDCs	LCH cells	pDC	HLA-DRA	0.854147	1.16392e-63	2.19353e-59
LCH cells vs pDCs	LCH cells	pDC	SERPINA1	0.85397	1.19719e-11	2.25623e-07
LCH cells vs pDCs	LCH cells	pDC	IL22RA2	0.850054	7.21525e-14	1.35979e-09
LCH cells vs pDCs	LCH cells	pDC	CD58	0.849222	3.14409e-39	5.92536e-35
LCH cells vs pDCs	LCH cells	pDC	ANXA5	0.84448	5.6746e-38	1.06944e-33
LCH cells vs pDCs	LCH cells	pDC	PHLDA2	0.835362	2.41301e-25	4.54755e-21
LCH cells vs pDCs	LCH cells	pDC	SGK1	0.833075	1.62046e-09	3.05392e-05
LCH cells vs pDCs	LCH cells	pDC	EMP3	0.831098	5.46824e-26	1.03054e-21
LCH cells vs pDCs	LCH cells	pDC	CSF1R	0.818645	1.77251e-39	3.34047e-35
LCH cells vs pDCs	LCH cells	pDC	CCND1	0.81194	2.70848e-23	5.1044e-19
LCH cells vs pDCs	LCH cells	pDC	ALDOA	0.806129	2.74346e-41	5.17033e-37
LCH cells vs pDCs	LCH cells	pDC	IL1RN	0.805556	9.35907e-10	1.76381e-05
LCH cells vs pDCs	LCH cells	pDC	HLA-DQB1	0.795921	1.13858e-37	2.14577e-33
LCH cells vs pDCs	LCH cells	pDC	CD9	0.795784	7.03103e-09	0.000132507
LCH cells vs pDCs	LCH cells	pDC	RBPJ	0.795483	2.94985e-41	5.55928e-37
LCH cells vs pDCs	LCH cells	pDC	IGSF6	0.793322	2.55852e-34	4.82179e-30
LCH cells vs pDCs	LCH cells	pDC	RP11-404O13.5	0.788108	1.53171e-20	2.88666e-16
LCH cells vs pDCs	LCH cells	pDC	ATP6AP2	0.787314	4.27652e-36	8.05952e-32
LCH cells vs pDCs	LCH cells	pDC	CST7	0.785825	4.59593e-25	8.6615e-21
LCH cells vs pDCs	LCH cells	pDC	CD44	0.784579	8.12163e-39	1.5306e-34
LCH cells vs pDCs	LCH cells	pDC	PPT1	0.783259	3.29254e-41	6.20513e-37
LCH cells vs pDCs	LCH cells	pDC	PAK1	0.781619	2.48497e-36	4.68317e-32
LCH cells vs pDCs	LCH cells	pDC	ENO1	0.77605	1.73651e-44	3.27262e-40
LCH cells vs pDCs	LCH cells	pDC	TMEM14C	0.770169	3.79693e-45	7.1557e-41
LCH cells vs pDCs	LCH cells	pDC	COTL1	0.766306	1.06055e-26	1.99871e-22
LCH cells vs pDCs	LCH cells	pDC	ANXA2	0.758061	3.90554e-28	7.36038e-24
LCH cells vs pDCs	LCH cells	pDC	ACTB	0.753929	5.69452e-49	1.07319e-44
LCH cells vs pDCs	LCH cells	pDC	HLA-DRB5	0.750464	2.41891e-09	4.55867e-05
LCH cells vs pDCs	LCH cells	pDC	S100A6	0.74503	5.55986e-33	1.04781e-28
LCH cells vs pDCs	LCH cells	pDC	CDKN2A	0.742147	4.01668e-20	7.56983e-16
LCH cells vs pDCs	LCH cells	pDC	CAPG	0.740222	1.17761e-45	2.21933e-41
LCH cells vs pDCs	LCH cells	pDC	CLEC4A	0.726474	6.61389e-26	1.24645e-21
LCH cells vs pDCs	LCH cells	pDC	GPR84	0.719487	3.55461e-17	6.69903e-13
LCH cells vs pDCs	LCH cells	pDC	TEX30	0.717927	1.77645e-20	3.34789e-16
LCH cells vs pDCs	LCH cells	pDC	IL18	0.715943	9.54631e-28	1.7991e-23
LCH cells vs pDCs	LCH cells	pDC	DOK2	0.715939	1.22565e-23	2.30986e-19
LCH cells vs pDCs	LCH cells	pDC	ZFP36L1	0.713725	3.559e-24	6.7073e-20
LCH cells vs pDCs	LCH cells	pDC	MNDA	0.707054	1.86587e-12	3.51642e-08
LCH cells vs pDCs	LCH cells	pDC	OGFRL1	0.705884	6.76679e-28	1.27527e-23
LCH cells vs pDCs	LCH cells	pDC	TSPO	0.695879	3.10067e-34	5.84352e-30
LCH cells vs pDCs	LCH cells	pDC	VIM	0.694366	4.05798e-31	7.64768e-27
LCH cells vs pDCs	LCH cells	pDC	NGFRAP1	0.692187	3.89113e-14	7.33323e-10
LCH cells vs pDCs	LCH cells	pDC	GLRX	0.68304	2.09518e-31	3.94857e-27
LCH cells vs pDCs	LCH cells	pDC	RAB32	0.6777	9.85824e-29	1.85788e-24
LCH cells vs pDCs	LCH cells	pDC	CD33	0.666697	9.44212e-23	1.77946e-18
LCH cells vs pDCs	LCH cells	pDC	CARD19	0.656988	4.76645e-22	8.98285e-18
LCH cells vs pDCs	LCH cells	pDC	TRPM4	0.653711	2.43971e-08	0.000459787
LCH cells vs pDCs	LCH cells	pDC	ALOX5	0.649286	1.19564e-31	2.2533e-27
LCH cells vs pDCs	LCH cells	pDC	CAMK1	0.646334	1.65555e-15	3.12004e-11
LCH cells vs pDCs	LCH cells	pDC	PGK1	0.645522	9.36794e-27	1.76548e-22
LCH cells vs pDCs	LCH cells	pDC	ID2	0.642606	1.03022e-09	1.94156e-05
LCH cells vs pDCs	LCH cells	pDC	ADAM8	0.640302	9.36213e-25	1.76439e-20
LCH cells vs pDCs	LCH cells	pDC	FILIP1L	0.632672	1.48327e-20	2.79537e-16
LCH cells vs pDCs	LCH cells	pDC	PDXK	0.629845	2.72549e-23	5.13646e-19
LCH cells vs pDCs	LCH cells	pDC	PFN1	0.62455	4.81986e-57	9.08351e-53
LCH cells vs pDCs	LCH cells	pDC	CD63	0.62022	8.5825e-15	1.61746e-10
LCH cells vs pDCs	LCH cells	pDC	CTSH	0.607654	6.59882e-21	1.24361e-16
LCH cells vs pDCs	LCH cells	pDC	GPAT3	0.604445	1.38789e-14	2.61562e-10
LCH cells vs pDCs	LCH cells	pDC	HCK	0.602051	3.3621e-24	6.33622e-20
LCH cells vs pDCs	LCH cells	pDC	RPS27L	0.601071	2.25876e-13	4.25686e-09
LCH cells vs pDCs	LCH cells	pDC	PYCARD	0.599628	4.5471e-17	8.56946e-13
LCH cells vs pDCs	LCH cells	pDC	TUBA1B	0.598598	4.57191e-12	8.61622e-08
LCH cells vs pDCs	LCH cells	pDC	H2AFZ	0.597113	1.51635e-12	2.85772e-08
LCH cells vs pDCs	LCH cells	pDC	AKR1A1	0.592699	1.44446e-29	2.72223e-25
LCH cells vs pDCs	LCH cells	pDC	CXCL16	0.590794	1.67504e-19	3.15678e-15
LCH cells vs pDCs	LCH cells	pDC	ZYX	0.588686	9.18414e-12	1.73084e-07
LCH cells vs pDCs	LCH cells	pDC	IFNGR1	0.585261	2.16142e-10	4.07341e-06
LCH cells vs pDCs	LCH cells	pDC	CSTB	0.581813	4.04582e-11	7.62476e-07
LCH cells vs pDCs	LCH cells	pDC	ABI3	0.569636	6.78972e-11	1.27959e-06
LCH cells vs pDCs	LCH cells	pDC	FGL2	0.568791	1.72561e-10	3.25208e-06
LCH cells vs pDCs	LCH cells	pDC	PLAU	0.566842	7.09118e-15	1.3364e-10
LCH cells vs pDCs	LCH cells	pDC	FCGRT	0.564891	2.42554e-18	4.57117e-14
LCH cells vs pDCs	LCH cells	pDC	C1orf162	0.564557	7.72338e-14	1.45555e-09
LCH cells vs pDCs	LCH cells	pDC	TNNT1	0.559809	3.17165e-10	5.97728e-06
LCH cells vs pDCs	LCH cells	pDC	PDLIM7	0.559478	2.43377e-14	4.58668e-10
LCH cells vs pDCs	LCH cells	pDC	GLIPR2	0.556789	5.70136e-20	1.07448e-15
LCH cells vs pDCs	LCH cells	pDC	CLEC5A	0.555936	5.73578e-20	1.08097e-15
LCH cells vs pDCs	LCH cells	pDC	TUBA1A	0.546879	4.8024e-17	9.0506e-13
LCH cells vs pDCs	LCH cells	pDC	ICAM3	0.546653	2.94682e-14	5.55358e-10
LCH cells vs pDCs	LCH cells	pDC	RUNX3	0.544247	5.50108e-15	1.03673e-10
LCH cells vs pDCs	LCH cells	pDC	LCP1	0.54373	7.68776e-26	1.44884e-21
LCH cells vs pDCs	LCH cells	pDC	PPIF	0.542505	3.61345e-19	6.80991e-15
LCH cells vs pDCs	LCH cells	pDC	HPRT1	0.538355	3.57204e-20	6.73187e-16
LCH cells vs pDCs	LCH cells	pDC	GHRL	0.535222	9.18936e-13	1.73183e-08
LCH cells vs pDCs	LCH cells	pDC	RHOG	0.528754	1.16664e-22	2.19864e-18
LCH cells vs pDCs	LCH cells	pDC	TRIM13	0.528364	1.02931e-07	0.00193984
LCH cells vs pDCs	LCH cells	pDC	RXRA	0.519617	4.9652e-13	9.35741e-09
LCH cells vs pDCs	LCH cells	pDC	PRELID1	0.516514	1.80895e-21	3.40915e-17
LCH cells vs pDCs	LCH cells	pDC	FTL	0.514046	3.6066e-14	6.797e-10
LCH cells vs pDCs	LCH cells	pDC	FGR	0.511871	1.13135e-13	2.13214e-09
LCH cells vs pDCs	LCH cells	pDC	AP2S1	0.508072	8.04362e-22	1.5159e-17
LCH cells vs pDCs	LCH cells	pDC	PTGS1	0.506747	6.05794e-21	1.14168e-16
LCH cells vs pDCs	LCH cells	pDC	ATG3	0.503449	4.97519e-20	9.37624e-16
LCH cells vs pDCs	LCH cells	pDC	SLAMF8	0.50322	1.64723e-17	3.10436e-13
LCH cells vs pDCs	LCH cells	pDC	STK17B	0.502178	4.54763e-23	8.57047e-19
LCH cells vs pDCs	LCH cells	pDC	ZNF385A	0.500124	9.82494e-20	1.85161e-15
LCH cells vs pDCs	LCH cells	pDC	CDC42	0.497925	5.40895e-15	1.01937e-10
LCH cells vs pDCs	LCH cells	pDC	PTPN6	0.491655	1.49244e-21	2.81266e-17
LCH cells vs pDCs	LCH cells	pDC	PARM1	0.490503	1.64197e-15	3.09446e-11
LCH cells vs pDCs	LCH cells	pDC	KCNN4	0.488577	7.27987e-10	1.37196e-05
LCH cells vs pDCs	LCH cells	pDC	TMSB4X	0.484061	2.63935e-22	4.97411e-18
LCH cells vs pDCs	LCH cells	pDC	GATM	0.483439	1.15784e-11	2.18206e-07
LCH cells vs pDCs	LCH cells	pDC	P2RY13	0.478432	3.01678e-11	5.68542e-07
LCH cells vs pDCs	LCH cells	pDC	GPX1	0.477415	2.23416e-21	4.21049e-17
LCH cells vs pDCs	LCH cells	pDC	MAP2K1	0.476929	8.75704e-21	1.65035e-16
LCH cells vs pDCs	LCH cells	pDC	ACOT7	0.475858	6.57349e-15	1.23884e-10
LCH cells vs pDCs	LCH cells	pDC	CLEC7A	0.475386	1.50794e-17	2.84187e-13
LCH cells vs pDCs	LCH cells	pDC	RAC1	0.471608	2.10478e-24	3.96667e-20
LCH cells vs pDCs	LCH cells	pDC	CCR6	0.466578	1.84106e-10	3.46967e-06
LCH cells vs pDCs	LCH cells	pDC	LGALS12	0.464857	1.76779e-07	0.00333157
LCH cells vs pDCs	LCH cells	pDC	BAX	0.462774	1.8938e-16	3.56905e-12
LCH cells vs pDCs	LCH cells	pDC	AP1S2	0.460321	3.36227e-12	6.33653e-08
LCH cells vs pDCs	LCH cells	pDC	SH3BGRL	0.456973	7.50903e-19	1.41515e-14
LCH cells vs pDCs	LCH cells	pDC	TCEAL4	0.455168	1.41179e-13	2.66067e-09
LCH cells vs pDCs	LCH cells	pDC	RAP1A	0.451977	4.73201e-14	8.91794e-10
LCH cells vs pDCs	LCH cells	pDC	RNASET2	0.4516	3.41785e-14	6.44128e-10
LCH cells vs pDCs	LCH cells	pDC	SDC2	0.450701	2.29891e-10	4.33252e-06
LCH cells vs pDCs	LCH cells	pDC	RPS19	0.450102	1.62751e-50	3.0672e-46
LCH cells vs pDCs	LCH cells	pDC	RHEB	0.447475	3.3476e-20	6.30888e-16
LCH cells vs pDCs	LCH cells	pDC	VDAC1	0.447433	1.99884e-10	3.76701e-06
LCH cells vs pDCs	LCH cells	pDC	PTMS	0.44719	2.47955e-18	4.67296e-14
LCH cells vs pDCs	LCH cells	pDC	LAMTOR2	0.445495	9.58843e-14	1.80703e-09
LCH cells vs pDCs	LCH cells	pDC	HNMT	0.445107	1.38847e-11	2.61672e-07
LCH cells vs pDCs	LCH cells	pDC	TNFAIP8L2	0.444599	2.24656e-14	4.23387e-10
LCH cells vs pDCs	LCH cells	pDC	NCF2	0.442545	3.79088e-13	7.14428e-09
LCH cells vs pDCs	LCH cells	pDC	SH3BP1	0.441707	7.90354e-13	1.4895e-08
LCH cells vs pDCs	LCH cells	pDC	POMP	0.440928	1.96289e-16	3.69926e-12
LCH cells vs pDCs	LCH cells	pDC	HPGD	0.439518	1.81501e-11	3.42056e-07
LCH cells vs pDCs	LCH cells	pDC	CLIC1	0.439241	4.28999e-19	8.08491e-15
LCH cells vs pDCs	LCH cells	pDC	LGALS9	0.437002	5.30511e-13	9.99802e-09
LCH cells vs pDCs	LCH cells	pDC	MIF	0.430226	5.04152e-09	9.50125e-05
LCH cells vs pDCs	LCH cells	pDC	CALM2	0.427505	3.32181e-16	6.26027e-12
LCH cells vs pDCs	LCH cells	pDC	ACTR3	0.425889	3.65752e-19	6.89297e-15
LCH cells vs pDCs	LCH cells	pDC	EVI2A	0.423288	4.06466e-18	7.66025e-14
LCH cells vs pDCs	LCH cells	pDC	BCAT1	0.420901	3.96286e-13	7.46841e-09
LCH cells vs pDCs	LCH cells	pDC	FSCN1	0.418643	8.04047e-10	1.51531e-05
LCH cells vs pDCs	LCH cells	pDC	PTPRC	0.416053	5.36238e-21	1.01059e-16
LCH cells vs pDCs	LCH cells	pDC	EFHD2	0.41584	4.29243e-09	8.08951e-05
LCH cells vs pDCs	LCH cells	pDC	RP11-347P5.1	0.415339	1.08835e-12	2.05111e-08
LCH cells vs pDCs	LCH cells	pDC	CDC42SE1	0.413222	4.8499e-10	9.14012e-06
LCH cells vs pDCs	LCH cells	pDC	FRMD4B	0.406972	2.87955e-12	5.42679e-08
LCH cells vs pDCs	LCH cells	pDC	CALM1	0.403331	2.53577e-08	0.000477892
LCH cells vs pDCs	LCH cells	pDC	TIGAR	0.403289	6.06758e-10	1.1435e-05
LCH cells vs pDCs	LCH cells	pDC	ARPC5	0.401935	3.21878e-19	6.06612e-15
LCH cells vs pDCs	LCH cells	pDC	EIF4EBP1	0.401015	2.18207e-15	4.11234e-11
LCH cells vs pDCs	LCH cells	pDC	RTN1	0.397446	2.42198e-11	4.56445e-07
LCH cells vs pDCs	LCH cells	pDC	SUSD3	0.396404	1.8724e-13	3.52872e-09
LCH cells vs pDCs	LCH cells	pDC	CALM3	0.395287	2.06468e-11	3.8911e-07
LCH cells vs pDCs	LCH cells	pDC	RHOC	0.393089	1.40288e-09	2.64387e-05
LCH cells vs pDCs	LCH cells	pDC	SLA	0.391645	2.9191e-08	0.000550133
LCH cells vs pDCs	LCH cells	pDC	TNFRSF9	0.389998	2.91294e-14	5.48973e-10
LCH cells vs pDCs	LCH cells	pDC	FAM162A	0.387989	2.6136e-13	4.92558e-09
LCH cells vs pDCs	LCH cells	pDC	GCA	0.387572	5.44057e-12	1.02533e-07
LCH cells vs pDCs	LCH cells	pDC	VPS29	0.384689	3.16221e-17	5.95951e-13
LCH cells vs pDCs	LCH cells	pDC	PON2	0.384685	8.50843e-10	1.6035e-05
LCH cells vs pDCs	LCH cells	pDC	COX5A	0.382809	1.29855e-16	2.44725e-12
LCH cells vs pDCs	LCH cells	pDC	YBX1	0.381571	2.01686e-19	3.80097e-15
LCH cells vs pDCs	LCH cells	pDC	SNX8	0.380552	5.78569e-13	1.09037e-08
LCH cells vs pDCs	LCH cells	pDC	TGFB1	0.375947	2.48386e-08	0.000468109
LCH cells vs pDCs	LCH cells	pDC	CDC123	0.375048	8.55097e-13	1.61152e-08
LCH cells vs pDCs	LCH cells	pDC	BLOC1S1	0.374712	2.87563e-13	5.41941e-09
LCH cells vs pDCs	LCH cells	pDC	HN1	0.371895	6.39043e-09	0.000120434
LCH cells vs pDCs	LCH cells	pDC	FAM109A	0.369893	1.38738e-11	2.61467e-07
LCH cells vs pDCs	LCH cells	pDC	LY86	0.369586	8.72338e-08	0.00164401
LCH cells vs pDCs	LCH cells	pDC	HAVCR2	0.368339	6.39986e-12	1.20612e-07
LCH cells vs pDCs	LCH cells	pDC	AP1S1	0.367182	1.30186e-09	2.45349e-05
LCH cells vs pDCs	LCH cells	pDC	SLC31A2	0.363624	5.57328e-11	1.05034e-06
LCH cells vs pDCs	LCH cells	pDC	NDUFB2	0.358063	6.53129e-12	1.23089e-07
LCH cells vs pDCs	LCH cells	pDC	RGS2	0.353184	1.61699e-13	3.04739e-09
LCH cells vs pDCs	LCH cells	pDC	EIF4E2	0.352898	3.67468e-13	6.92531e-09
LCH cells vs pDCs	LCH cells	pDC	DOK1	0.352783	3.32559e-10	6.2674e-06
LCH cells vs pDCs	LCH cells	pDC	ARF3	0.349966	9.11564e-12	1.71793e-07
LCH cells vs pDCs	LCH cells	pDC	ITGB2-AS1	0.345793	3.41714e-09	6.43994e-05
LCH cells vs pDCs	LCH cells	pDC	MFSD1	0.345161	2.68839e-09	5.06654e-05
LCH cells vs pDCs	LCH cells	pDC	SPINT1	0.342949	1.84072e-12	3.46902e-08
LCH cells vs pDCs	LCH cells	pDC	FFAR4	0.341804	1.50675e-10	2.83962e-06
LCH cells vs pDCs	LCH cells	pDC	TBCA	0.340173	1.01558e-07	0.00191396
LCH cells vs pDCs	LCH cells	pDC	PRDX5	0.338091	3.70196e-08	0.00069767
LCH cells vs pDCs	LCH cells	pDC	CFL1	0.336742	3.09753e-24	5.8376e-20
LCH cells vs pDCs	LCH cells	pDC	GAS2L1	0.335083	1.78498e-08	0.000336397
LCH cells vs pDCs	LCH cells	pDC	PGAM1	0.335059	2.10522e-08	0.00039675
LCH cells vs pDCs	LCH cells	pDC	IL13RA1	0.330656	6.75487e-11	1.27302e-06
LCH cells vs pDCs	LCH cells	pDC	DOCK5	0.328619	2.97732e-10	5.61105e-06
LCH cells vs pDCs	LCH cells	pDC	CD52	0.325882	2.17754e-14	4.1038e-10
LCH cells vs pDCs	LCH cells	pDC	PTTG1	0.323056	1.00492e-07	0.00189386
LCH cells vs pDCs	LCH cells	pDC	ARF6	0.322479	1.24739e-10	2.35083e-06
LCH cells vs pDCs	LCH cells	pDC	HACD4	0.321845	8.75967e-08	0.00165085
LCH cells vs pDCs	LCH cells	pDC	APOBR	0.316511	1.58103e-08	0.000297962
LCH cells vs pDCs	LCH cells	pDC	SMCO4	0.315821	5.03004e-09	9.47961e-05
LCH cells vs pDCs	LCH cells	pDC	TPMT	0.31493	1.57701e-08	0.000297203
LCH cells vs pDCs	LCH cells	pDC	ARPC2	0.314577	2.77755e-15	5.23456e-11
LCH cells vs pDCs	LCH cells	pDC	CARD9	0.313369	4.06666e-11	7.66404e-07
LCH cells vs pDCs	LCH cells	pDC	MINOS1	0.311403	1.49251e-08	0.000281279
LCH cells vs pDCs	LCH cells	pDC	MKNK1	0.305943	1.62945e-08	0.000307087
LCH cells vs pDCs	LCH cells	pDC	INSIG2	0.303682	1.24153e-08	0.000233978
LCH cells vs pDCs	LCH cells	pDC	RASL10A	0.301168	5.40226e-08	0.00101811
LCH cells vs pDCs	LCH cells	pDC	BTF3L4	0.296937	1.45163e-07	0.00273574
LCH cells vs pDCs	LCH cells	pDC	PHPT1	0.296696	4.47256e-10	8.429e-06
LCH cells vs pDCs	LCH cells	pDC	PDLIM2	0.295192	1.69823e-07	0.00320049
LCH cells vs pDCs	LCH cells	pDC	MYO1F	0.293014	1.58698e-08	0.000299083
LCH cells vs pDCs	LCH cells	pDC	HCLS1	0.290153	3.85576e-09	7.26656e-05
LCH cells vs pDCs	LCH cells	pDC	CD276	0.290029	2.65747e-08	0.000500827
LCH cells vs pDCs	LCH cells	pDC	ATP1B1	0.287004	6.68366e-08	0.0012596
LCH cells vs pDCs	LCH cells	pDC	PSMC4	0.285878	1.57139e-07	0.00296144
LCH cells vs pDCs	LCH cells	pDC	RP11-350J20.12	0.285405	3.76056e-10	7.08716e-06
LCH cells vs pDCs	LCH cells	pDC	EPB41L2	0.28143	2.28839e-08	0.00043127
LCH cells vs pDCs	LCH cells	pDC	ARHGAP18	0.280433	3.37728e-09	6.36483e-05
LCH cells vs pDCs	LCH cells	pDC	SPG21	0.272168	5.68905e-08	0.00107216
LCH cells vs pDCs	LCH cells	pDC	ATP5C1	0.260868	7.72356e-09	0.000145558
LCH cells vs pDCs	LCH cells	pDC	VAMP8	0.212186	2.9837e-14	5.62308e-10
LCH cells vs pDCs	LCH cells	pDC	LSP1	0.085091	1.22222e-16	2.30339e-12
LCH cells vs pDCs	LCH cells	pDC	TGFBI	0.0176889	7.42935e-13	1.40013e-08
LCH cells vs pDCs	LCH cells	pDC	SLC38A1	0.00562805	4.33681e-09	8.17316e-05
LCH cells vs pDCs	LCH cells	pDC	RNF5	0.00177976	1.23973e-08	0.00023364
LCH cells vs pDCs	pDCs	LCH cells	ST14	-0.029869	5.39338e-09	0.000101644
LCH cells vs pDCs	pDCs	LCH cells	IL10RA	-0.0343327	2.21655e-07	0.0041773
LCH cells vs pDCs	pDCs	LCH cells	RPS29	-0.0552967	4.45933e-12	8.40405e-08
LCH cells vs pDCs	pDCs	LCH cells	CD4	-0.0799868	4.41822e-11	8.32657e-07
LCH cells vs pDCs	pDCs	LCH cells	RNASE6	-0.119786	2.27472e-10	4.28694e-06
LCH cells vs pDCs	pDCs	LCH cells	GIMAP4	-0.15415	6.14342e-13	1.15779e-08
LCH cells vs pDCs	pDCs	LCH cells	LGALS3	-0.190406	7.31301e-13	1.37821e-08
LCH cells vs pDCs	pDCs	LCH cells	TXN	-0.20242	3.16986e-12	5.97392e-08
LCH cells vs pDCs	pDCs	LCH cells	ABCD4	-0.268467	2.91093e-09	5.48594e-05
LCH cells vs pDCs	pDCs	LCH cells	CD38	-0.287197	4.61302e-60	8.6937e-56
LCH cells vs pDCs	pDCs	LCH cells	ENPP2	-0.293763	2.47429e-09	4.66305e-05
LCH cells vs pDCs	pDCs	LCH cells	ADD3	-0.297718	9.01495e-09	0.000169896
LCH cells vs pDCs	pDCs	LCH cells	FLNB	-0.317225	1.96133e-53	3.69633e-49
LCH cells vs pDCs	pDCs	LCH cells	MALAT1	-0.319429	9.98019e-18	1.88087e-13
LCH cells vs pDCs	pDCs	LCH cells	TBC1D10C	-0.320683	3.51459e-08	0.00066236
LCH cells vs pDCs	pDCs	LCH cells	HLA-F	-0.327489	3.79922e-10	7.16002e-06
LCH cells vs pDCs	pDCs	LCH cells	B2M	-0.32988	4.28304e-18	8.07182e-14
LCH cells vs pDCs	pDCs	LCH cells	PIM2	-0.368988	9.21499e-08	0.00173666
LCH cells vs pDCs	pDCs	LCH cells	ETS1	-0.379445	2.31421e-93	4.36136e-89
LCH cells vs pDCs	pDCs	LCH cells	ARPC5L	-0.381234	1.77471e-07	0.00334461
LCH cells vs pDCs	pDCs	LCH cells	FAM43A	-0.382065	5.7608e-42	1.08568e-37
LCH cells vs pDCs	pDCs	LCH cells	SRP14	-0.384268	2.5034e-08	0.000471791
LCH cells vs pDCs	pDCs	LCH cells	ITGAE	-0.387786	7.10291e-09	0.000133861
LCH cells vs pDCs	pDCs	LCH cells	BLK	-0.389303	5.07715e-89	9.5684e-85
LCH cells vs pDCs	pDCs	LCH cells	SCARB2	-0.389481	1.40742e-32	2.65242e-28
LCH cells vs pDCs	pDCs	LCH cells	TMEM59	-0.392939	4.46641e-15	8.4174e-11
LCH cells vs pDCs	pDCs	LCH cells	DAAM1	-0.399172	1.73862e-10	3.2766e-06
LCH cells vs pDCs	pDCs	LCH cells	EIF4A2	-0.405781	3.40646e-08	0.000641981
LCH cells vs pDCs	pDCs	LCH cells	ZNF706	-0.408423	2.94903e-09	5.55775e-05
LCH cells vs pDCs	pDCs	LCH cells	KTN1	-0.412943	4.32898e-12	8.1584e-08
LCH cells vs pDCs	pDCs	LCH cells	LMAN1	-0.412946	2.03233e-10	3.83013e-06
LCH cells vs pDCs	pDCs	LCH cells	CD320	-0.413558	1.42357e-30	2.68285e-26
LCH cells vs pDCs	pDCs	LCH cells	GPX7	-0.4142	1.17361e-56	2.21179e-52
LCH cells vs pDCs	pDCs	LCH cells	ANAPC16	-0.421136	2.43482e-09	4.58866e-05
LCH cells vs pDCs	pDCs	LCH cells	SERPINF1	-0.426048	4.19354e-20	7.90315e-16
LCH cells vs pDCs	pDCs	LCH cells	JAK1	-0.430397	1.7674e-12	3.33084e-08
LCH cells vs pDCs	pDCs	LCH cells	SNHG7	-0.437326	3.58387e-11	6.75416e-07
LCH cells vs pDCs	pDCs	LCH cells	RPS28	-0.443738	1.26602e-10	2.38593e-06
LCH cells vs pDCs	pDCs	LCH cells	CD180	-0.444002	6.33032e-100	1.19301e-95
LCH cells vs pDCs	pDCs	LCH cells	GGA2	-0.446323	3.96366e-09	7.46991e-05
LCH cells vs pDCs	pDCs	LCH cells	RPLP0	-0.456637	3.58053e-09	6.74786e-05
LCH cells vs pDCs	pDCs	LCH cells	SEC62	-0.457858	2.00609e-16	3.78068e-12
LCH cells vs pDCs	pDCs	LCH cells	IFNAR2	-0.458408	1.04219e-19	1.96412e-15
LCH cells vs pDCs	pDCs	LCH cells	SLAMF7	-0.459321	3.97967e-52	7.50009e-48
LCH cells vs pDCs	pDCs	LCH cells	HLA-C	-0.462606	1.8905e-13	3.56283e-09
LCH cells vs pDCs	pDCs	LCH cells	PDCD4	-0.464198	7.9447e-08	0.00149726
LCH cells vs pDCs	pDCs	LCH cells	RABAC1	-0.464444	7.20561e-14	1.35797e-09
LCH cells vs pDCs	pDCs	LCH cells	GUK1	-0.481733	5.93901e-14	1.11927e-09
LCH cells vs pDCs	pDCs	LCH cells	RRBP1	-0.488558	5.84201e-09	0.000110099
LCH cells vs pDCs	pDCs	LCH cells	CHST12	-0.493443	4.53508e-33	8.54681e-29
LCH cells vs pDCs	pDCs	LCH cells	SIT1	-0.504305	2.16687e-20	4.08368e-16
LCH cells vs pDCs	pDCs	LCH cells	CXXC5	-0.541998	6.54921e-30	1.23426e-25
LCH cells vs pDCs	pDCs	LCH cells	OAS1	-0.546876	4.2309e-12	7.97355e-08
LCH cells vs pDCs	pDCs	LCH cells	SEL1L3	-0.559069	1.01957e-63	1.92147e-59
LCH cells vs pDCs	pDCs	LCH cells	SEPT1	-0.58947	5.52818e-11	1.04184e-06
LCH cells vs pDCs	pDCs	LCH cells	SERPING1	-0.593013	1.64941e-21	3.10847e-17
LCH cells vs pDCs	pDCs	LCH cells	NCOA7	-0.594244	3.71035e-11	6.99253e-07
LCH cells vs pDCs	pDCs	LCH cells	TRAF3IP3	-0.595857	1.81305e-48	3.41688e-44
LCH cells vs pDCs	pDCs	LCH cells	SSR4	-0.597526	1.84955e-07	0.00348567
LCH cells vs pDCs	pDCs	LCH cells	ADA	-0.599457	3.99725e-22	7.53323e-18
LCH cells vs pDCs	pDCs	LCH cells	GPM6B	-0.604374	6.96326e-10	1.3123e-05
LCH cells vs pDCs	pDCs	LCH cells	ZFAT	-0.623983	1.23334e-47	2.32435e-43
LCH cells vs pDCs	pDCs	LCH cells	TRAM1	-0.639246	3.08452e-11	5.81308e-07
LCH cells vs pDCs	pDCs	LCH cells	LGMN	-0.643486	5.7371e-22	1.08121e-17
LCH cells vs pDCs	pDCs	LCH cells	TNFRSF17	-0.648968	7.57406e-240	1.42741e-235
LCH cells vs pDCs	pDCs	LCH cells	FAM213A	-0.651707	4.50508e-48	8.49028e-44
LCH cells vs pDCs	pDCs	LCH cells	HLA-B	-0.652856	1.34265e-14	2.53036e-10
LCH cells vs pDCs	pDCs	LCH cells	IFI27	-0.653757	1.37851e-08	0.000259794
LCH cells vs pDCs	pDCs	LCH cells	FAM129C	-0.655549	2.4413e-115	4.60088e-111
LCH cells vs pDCs	pDCs	LCH cells	DDIT4	-0.671585	2.05669e-08	0.000387605
LCH cells vs pDCs	pDCs	LCH cells	ZFP36L2	-0.677242	1.77524e-15	3.34562e-11
LCH cells vs pDCs	pDCs	LCH cells	PPM1K	-0.689647	4.79635e-30	9.03919e-26
LCH cells vs pDCs	pDCs	LCH cells	SPCS1	-0.698394	1.13436e-09	2.13782e-05
LCH cells vs pDCs	pDCs	LCH cells	NUCB2	-0.706013	4.6463e-12	8.75641e-08
LCH cells vs pDCs	pDCs	LCH cells	XBP1	-0.719735	3.62771e-12	6.83678e-08
LCH cells vs pDCs	pDCs	LCH cells	GAS6	-0.732447	5.04763e-58	9.51277e-54
LCH cells vs pDCs	pDCs	LCH cells	SMIM14	-0.734881	1.146e-17	2.15975e-13
LCH cells vs pDCs	pDCs	LCH cells	SOX4	-0.749773	4.26756e-38	8.04264e-34
LCH cells vs pDCs	pDCs	LCH cells	HLA-E	-0.757065	2.50964e-26	4.72966e-22
LCH cells vs pDCs	pDCs	LCH cells	LAMP5	-0.757154	2.9284e-127	5.51887e-123
LCH cells vs pDCs	pDCs	LCH cells	UBE2J1	-0.766316	1.46953e-25	2.76948e-21
LCH cells vs pDCs	pDCs	LCH cells	PTCRA	-0.835949	4.8012e-125	9.04834e-121
LCH cells vs pDCs	pDCs	LCH cells	BCL11A	-0.874331	5.16766e-70	9.73898e-66
LCH cells vs pDCs	pDCs	LCH cells	CD79B	-0.894148	4.30818e-71	8.11919e-67
LCH cells vs pDCs	pDCs	LCH cells	BLNK	-0.895433	1.45045e-156	2.73352e-152
LCH cells vs pDCs	pDCs	LCH cells	ISG20	-0.917277	3.66433e-81	6.9058e-77
LCH cells vs pDCs	pDCs	LCH cells	CCDC50	-0.928293	4.91537e-10	9.26351e-06
LCH cells vs pDCs	pDCs	LCH cells	UGCG	-0.935813	2.29355e-31	4.32243e-27
LCH cells vs pDCs	pDCs	LCH cells	LILRB4	-0.968898	3.22192e-122	6.07203e-118
LCH cells vs pDCs	pDCs	LCH cells	CD79A	-0.981837	3.95746e-93	7.45822e-89
LCH cells vs pDCs	pDCs	LCH cells	SPIB	-1.07407	9.60936e-43	1.81098e-38
LCH cells vs pDCs	pDCs	LCH cells	NPC2	-1.09637	4.31352e-32	8.12925e-28
LCH cells vs pDCs	pDCs	LCH cells	PLVAP	-1.19745	4.44555e-201	8.37808e-197
LCH cells vs pDCs	pDCs	LCH cells	CLIC3	-1.2064	3.03604e-49	5.72172e-45
LCH cells vs pDCs	pDCs	LCH cells	TSPAN13	-1.22595	1.88611e-09	3.55457e-05
LCH cells vs pDCs	pDCs	LCH cells	DERL3	-1.24927	5.16135e-52	9.72708e-48
LCH cells vs pDCs	pDCs	LCH cells	PLAC8	-1.26998	6.73499e-37	1.26928e-32
LCH cells vs pDCs	pDCs	LCH cells	CXCR4	-1.29086	3.8196e-19	7.19842e-15
LCH cells vs pDCs	pDCs	LCH cells	APP	-1.2964	4.8812e-158	9.1991e-154
LCH cells vs pDCs	pDCs	LCH cells	IL3RA	-1.33004	2.00102e-163	3.77112e-159
LCH cells vs pDCs	pDCs	LCH cells	TCF4	-1.33692	2.02621e-79	3.8186e-75
LCH cells vs pDCs	pDCs	LCH cells	HERPUD1	-1.39902	8.86441e-23	1.67059e-18
LCH cells vs pDCs	pDCs	LCH cells	SELL	-1.4287	6.1311e-133	1.15547e-128
LCH cells vs pDCs	pDCs	LCH cells	LILRA4	-1.45436	1.44278e-108	2.71906e-104
LCH cells vs pDCs	pDCs	LCH cells	MS4A1	-1.5015	9.96555e-52	1.87811e-47
LCH cells vs pDCs	pDCs	LCH cells	TCL1A	-1.62169	5.88287e-146	1.10869e-141
LCH cells vs pDCs	pDCs	LCH cells	IRF8	-1.66494	2.27338e-14	4.28441e-10
LCH cells vs pDCs	pDCs	LCH cells	IRF7	-1.70498	7.65552e-11	1.44276e-06
LCH cells vs pDCs	pDCs	LCH cells	ITM2C	-1.91943	1.49492e-112	2.81733e-108
LCH cells vs pDCs	pDCs	LCH cells	MZB1	-1.99818	7.6511e-196	1.44193e-191
LCH cells vs pDCs	pDCs	LCH cells	IGLC3	-2.09377	7.15801e-18	1.349e-13
LCH cells vs pDCs	pDCs	LCH cells	IGHM	-2.41104	5.64209e-33	1.06331e-28
LCH cells vs pDCs	pDCs	LCH cells	IGLC2	-2.50415	3.04552e-17	5.73958e-13
LCH cells vs pDCs	pDCs	LCH cells	IGHG1	-2.65763	4.5218e-12	8.52179e-08
LCH cells vs pDCs	pDCs	LCH cells	GZMB	-3.38931	6.87738e-40	1.29611e-35
LCH cells vs pDCs	pDCs	LCH cells	JCHAIN	-3.42174	3.22112e-61	6.07051e-57
LCH cells vs pDCs	pDCs	LCH cells	IGKC	-3.82478	1.92082e-45	3.61997e-41
LCH cells vs monocytes/macrophages	LCH cells	Mono./mac.	TACSTD2	1.68816	4.15338e-101	7.82746e-97
LCH cells vs monocytes/macrophages	LCH cells	Mono./mac.	CD1A	1.5556	9.67794e-119	1.8239e-114
LCH cells vs monocytes/macrophages	LCH cells	Mono./mac.	HLA-DQB2	1.44548	1.83257e-79	3.45367e-75
LCH cells vs monocytes/macrophages	LCH cells	Mono./mac.	CD207	1.42279	7.54257e-83	1.42147e-78
LCH cells vs monocytes/macrophages	LCH cells	Mono./mac.	PPM1N	1.3171	1.22078e-88	2.30068e-84
LCH cells vs monocytes/macrophages	LCH cells	Mono./mac.	PLEK2	1.24166	2.03562e-83	3.83633e-79
LCH cells vs monocytes/macrophages	LCH cells	Mono./mac.	FCGBP	1.23296	6.48108e-76	1.22142e-71
LCH cells vs monocytes/macrophages	LCH cells	Mono./mac.	S100B	1.23227	3.24327e-59	6.11226e-55
LCH cells vs monocytes/macrophages	LCH cells	Mono./mac.	HLA-DQA2	1.17409	7.39658e-83	1.39396e-78
LCH cells vs monocytes/macrophages	LCH cells	Mono./mac.	HPGDS	1.15689	6.91788e-79	1.30374e-74
LCH cells vs monocytes/macrophages	LCH cells	Mono./mac.	FCER1A	1.15597	9.54598e-83	1.79904e-78
LCH cells vs monocytes/macrophages	LCH cells	Mono./mac.	RGS16	1.14064	2.86525e-24	5.39985e-20
LCH cells vs monocytes/macrophages	LCH cells	Mono./mac.	CD1C	1.10097	1.69912e-64	3.20216e-60
LCH cells vs monocytes/macrophages	LCH cells	Mono./mac.	NDRG2	1.07658	1.68963e-95	3.18428e-91
LCH cells vs monocytes/macrophages	LCH cells	Mono./mac.	SPINK2	1.06927	5.92648e-30	1.11691e-25
LCH cells vs monocytes/macrophages	LCH cells	Mono./mac.	LMNA	1.05876	3.18236e-71	5.99748e-67
LCH cells vs monocytes/macrophages	LCH cells	Mono./mac.	CA2	0.974269	4.29922e-61	8.10231e-57
LCH cells vs monocytes/macrophages	LCH cells	Mono./mac.	IL22RA2	0.932223	3.44916e-28	6.50029e-24
LCH cells vs monocytes/macrophages	LCH cells	Mono./mac.	CD1E	0.909162	6.33695e-73	1.19426e-68
LCH cells vs monocytes/macrophages	LCH cells	Mono./mac.	CKLF	0.869056	5.32097e-81	1.00279e-76
LCH cells vs monocytes/macrophages	LCH cells	Mono./mac.	TNF	0.861773	1.45708e-47	2.74602e-43
LCH cells vs monocytes/macrophages	LCH cells	Mono./mac.	CTNNBIP1	0.832072	3.00914e-66	5.67103e-62
LCH cells vs monocytes/macrophages	LCH cells	Mono./mac.	TPM2	0.80196	4.94817e-20	9.32532e-16
LCH cells vs monocytes/macrophages	LCH cells	Mono./mac.	SMYD3	0.784144	2.05744e-25	3.87745e-21
LCH cells vs monocytes/macrophages	LCH cells	Mono./mac.	RP11-404O13.5	0.781573	2.99358e-33	5.6417e-29
LCH cells vs monocytes/macrophages	LCH cells	Mono./mac.	GSN	0.776579	8.27119e-97	1.55879e-92
LCH cells vs monocytes/macrophages	LCH cells	Mono./mac.	DBI	0.753863	4.49071e-39	8.46319e-35
LCH cells vs monocytes/macrophages	LCH cells	Mono./mac.	STMN1	0.742077	2.91228e-32	5.48849e-28
LCH cells vs monocytes/macrophages	LCH cells	Mono./mac.	PTMS	0.725837	4.86106e-60	9.16115e-56
LCH cells vs monocytes/macrophages	LCH cells	Mono./mac.	PKIB	0.722789	3.15873e-65	5.95294e-61
LCH cells vs monocytes/macrophages	LCH cells	Mono./mac.	LTB	0.720889	2.44544e-23	4.60868e-19
LCH cells vs monocytes/macrophages	LCH cells	Mono./mac.	VASP	0.717441	3.16061e-58	5.95648e-54
LCH cells vs monocytes/macrophages	LCH cells	Mono./mac.	TUBA1B	0.711717	5.59907e-52	1.0552e-47
LCH cells vs monocytes/macrophages	LCH cells	Mono./mac.	CCND1	0.711371	2.45408e-37	4.62496e-33
LCH cells vs monocytes/macrophages	LCH cells	Mono./mac.	HOPX	0.703629	2.24854e-16	4.23761e-12
LCH cells vs monocytes/macrophages	LCH cells	Mono./mac.	CTSW	0.683787	1.58821e-30	2.99314e-26
LCH cells vs monocytes/macrophages	LCH cells	Mono./mac.	NGFRAP1	0.668879	3.95848e-39	7.46016e-35
LCH cells vs monocytes/macrophages	LCH cells	Mono./mac.	TEX30	0.652609	5.20969e-32	9.81818e-28
LCH cells vs monocytes/macrophages	LCH cells	Mono./mac.	PKM	0.640259	1.19938e-68	2.26035e-64
LCH cells vs monocytes/macrophages	LCH cells	Mono./mac.	TRIM13	0.631627	1.77911e-26	3.35292e-22
LCH cells vs monocytes/macrophages	LCH cells	Mono./mac.	PHLDA2	0.63023	1.96314e-26	3.69974e-22
LCH cells vs monocytes/macrophages	LCH cells	Mono./mac.	TMEM14C	0.627727	3.41912e-58	6.44368e-54
LCH cells vs monocytes/macrophages	LCH cells	Mono./mac.	ICAM3	0.613467	7.71872e-20	1.45467e-15
LCH cells vs monocytes/macrophages	LCH cells	Mono./mac.	CD59	0.606362	4.52843e-41	8.53429e-37
LCH cells vs monocytes/macrophages	LCH cells	Mono./mac.	CD52	0.595595	1.54949e-26	2.92018e-22
LCH cells vs monocytes/macrophages	LCH cells	Mono./mac.	RNASET2	0.591037	1.83917e-12	3.46609e-08
LCH cells vs monocytes/macrophages	LCH cells	Mono./mac.	GHRL	0.582866	3.40799e-25	6.4227e-21
LCH cells vs monocytes/macrophages	LCH cells	Mono./mac.	S100A4	0.579674	4.48056e-16	8.44406e-12
LCH cells vs monocytes/macrophages	LCH cells	Mono./mac.	PTPN6	0.573739	1.23077e-25	2.3195e-21
LCH cells vs monocytes/macrophages	LCH cells	Mono./mac.	TRPM4	0.570828	2.90131e-17	5.46781e-13
LCH cells vs monocytes/macrophages	LCH cells	Mono./mac.	SLC29A1	0.57009	4.99801e-26	9.41925e-22
LCH cells vs monocytes/macrophages	LCH cells	Mono./mac.	YWHAH	0.569914	5.35461e-37	1.00913e-32
LCH cells vs monocytes/macrophages	LCH cells	Mono./mac.	FILIP1L	0.56951	3.00513e-31	5.66346e-27
LCH cells vs monocytes/macrophages	LCH cells	Mono./mac.	CD74	0.556805	1.36744e-92	2.57708e-88
LCH cells vs monocytes/macrophages	LCH cells	Mono./mac.	ACOT7	0.539142	1.13522e-24	2.13943e-20
LCH cells vs monocytes/macrophages	LCH cells	Mono./mac.	MMP9	0.538101	8.58025e-34	1.61703e-29
LCH cells vs monocytes/macrophages	LCH cells	Mono./mac.	ALOX5AP	0.529673	2.03462e-33	3.83444e-29
LCH cells vs monocytes/macrophages	LCH cells	Mono./mac.	PAK1	0.528117	5.70945e-28	1.076e-23
LCH cells vs monocytes/macrophages	LCH cells	Mono./mac.	IL2RG	0.527746	6.28067e-34	1.18366e-29
LCH cells vs monocytes/macrophages	LCH cells	Mono./mac.	C12orf75	0.524043	2.05225e-07	0.00386767
LCH cells vs monocytes/macrophages	LCH cells	Mono./mac.	FUT7	0.523648	3.07085e-21	5.78732e-17
LCH cells vs monocytes/macrophages	LCH cells	Mono./mac.	CARD19	0.521691	3.38244e-20	6.37454e-16
LCH cells vs monocytes/macrophages	LCH cells	Mono./mac.	EMP1	0.515684	1.18541e-11	2.23403e-07
LCH cells vs monocytes/macrophages	LCH cells	Mono./mac.	RGS10	0.504984	4.336e-55	8.17163e-51
LCH cells vs monocytes/macrophages	LCH cells	Mono./mac.	CCR6	0.500387	1.21927e-22	2.29784e-18
LCH cells vs monocytes/macrophages	LCH cells	Mono./mac.	RUNX3	0.498683	7.29062e-19	1.37399e-14
LCH cells vs monocytes/macrophages	LCH cells	Mono./mac.	HLA-DPA1	0.498061	3.05601e-52	5.75936e-48
LCH cells vs monocytes/macrophages	LCH cells	Mono./mac.	TUBB	0.494601	2.37407e-21	4.47418e-17
LCH cells vs monocytes/macrophages	LCH cells	Mono./mac.	HLA-DQB1	0.491186	4.84472e-39	9.13036e-35
LCH cells vs monocytes/macrophages	LCH cells	Mono./mac.	CDKN2A	0.482667	7.33079e-26	1.38156e-21
LCH cells vs monocytes/macrophages	LCH cells	Mono./mac.	RPS19	0.481692	1.41748e-75	2.67138e-71
LCH cells vs monocytes/macrophages	LCH cells	Mono./mac.	LGALS12	0.480136	1.22268e-14	2.30426e-10
LCH cells vs monocytes/macrophages	LCH cells	Mono./mac.	HLA-DQA1	0.479748	4.81097e-45	9.06676e-41
LCH cells vs monocytes/macrophages	LCH cells	Mono./mac.	RHOC	0.470693	3.41869e-26	6.44287e-22
LCH cells vs monocytes/macrophages	LCH cells	Mono./mac.	RXRA	0.469598	1.13065e-21	2.13083e-17
LCH cells vs monocytes/macrophages	LCH cells	Mono./mac.	CD33	0.459495	8.6343e-14	1.62722e-09
LCH cells vs monocytes/macrophages	LCH cells	Mono./mac.	HINT1	0.450082	2.72016e-60	5.1264e-56
LCH cells vs monocytes/macrophages	LCH cells	Mono./mac.	SUSD3	0.448414	2.59555e-23	4.89158e-19
LCH cells vs monocytes/macrophages	LCH cells	Mono./mac.	PLP2	0.447856	1.83192e-12	3.45243e-08
LCH cells vs monocytes/macrophages	LCH cells	Mono./mac.	PGA5	0.444015	5.21821e-13	9.83424e-09
LCH cells vs monocytes/macrophages	LCH cells	Mono./mac.	MAP2K1	0.443006	1.37469e-17	2.59075e-13
LCH cells vs monocytes/macrophages	LCH cells	Mono./mac.	HLA-DPB1	0.441767	7.85805e-45	1.48093e-40
LCH cells vs monocytes/macrophages	LCH cells	Mono./mac.	OCIAD2	0.438971	1.41083e-29	2.65885e-25
LCH cells vs monocytes/macrophages	LCH cells	Mono./mac.	HSP90AB1	0.432624	7.53493e-45	1.42003e-40
LCH cells vs monocytes/macrophages	LCH cells	Mono./mac.	TMEM8B	0.429315	7.46848e-15	1.40751e-10
LCH cells vs monocytes/macrophages	LCH cells	Mono./mac.	RP11-347P5.1	0.429057	1.61264e-15	3.03919e-11
LCH cells vs monocytes/macrophages	LCH cells	Mono./mac.	GLRX	0.426161	5.39873e-17	1.01744e-12
LCH cells vs monocytes/macrophages	LCH cells	Mono./mac.	PTTG1	0.419469	3.61836e-22	6.81915e-18
LCH cells vs monocytes/macrophages	LCH cells	Mono./mac.	CDC123	0.415335	1.06268e-20	2.00273e-16
LCH cells vs monocytes/macrophages	LCH cells	Mono./mac.	RHOF	0.414417	3.41735e-25	6.44034e-21
LCH cells vs monocytes/macrophages	LCH cells	Mono./mac.	CALM1	0.414075	2.30156e-12	4.33752e-08
LCH cells vs monocytes/macrophages	LCH cells	Mono./mac.	H2AFZ	0.410979	3.83727e-18	7.23173e-14
LCH cells vs monocytes/macrophages	LCH cells	Mono./mac.	PARM1	0.405323	1.2487e-23	2.3533e-19
LCH cells vs monocytes/macrophages	LCH cells	Mono./mac.	NUDT5	0.404862	4.53171e-20	8.54046e-16
LCH cells vs monocytes/macrophages	LCH cells	Mono./mac.	PDLIM2	0.403326	4.66582e-12	8.79321e-08
LCH cells vs monocytes/macrophages	LCH cells	Mono./mac.	GPR84	0.400833	8.59521e-13	1.61985e-08
LCH cells vs monocytes/macrophages	LCH cells	Mono./mac.	CKS1B	0.397601	3.24619e-18	6.11776e-14
LCH cells vs monocytes/macrophages	LCH cells	Mono./mac.	CST7	0.394813	9.17675e-17	1.72945e-12
LCH cells vs monocytes/macrophages	LCH cells	Mono./mac.	CAMK1	0.394247	1.33097e-09	2.50836e-05
LCH cells vs monocytes/macrophages	LCH cells	Mono./mac.	PFDN2	0.387914	3.21918e-31	6.06686e-27
LCH cells vs monocytes/macrophages	LCH cells	Mono./mac.	GAPDH	0.374546	5.49774e-27	1.0361e-22
LCH cells vs monocytes/macrophages	LCH cells	Mono./mac.	RPSA	0.368003	1.10922e-35	2.09043e-31
LCH cells vs monocytes/macrophages	LCH cells	Mono./mac.	STK17B	0.364098	1.84161e-11	3.4707e-07
LCH cells vs monocytes/macrophages	LCH cells	Mono./mac.	RPL4	0.363818	5.38415e-31	1.0147e-26
LCH cells vs monocytes/macrophages	LCH cells	Mono./mac.	GNA15	0.361981	1.69093e-24	3.18673e-20
LCH cells vs monocytes/macrophages	LCH cells	Mono./mac.	HSPA8	0.360644	4.06875e-22	7.66797e-18
LCH cells vs monocytes/macrophages	LCH cells	Mono./mac.	RPS27L	0.358383	8.1326e-19	1.53267e-14
LCH cells vs monocytes/macrophages	LCH cells	Mono./mac.	ARHGAP9	0.35834	1.39951e-15	2.63752e-11
LCH cells vs monocytes/macrophages	LCH cells	Mono./mac.	CCDC107	0.356744	1.97934e-14	3.73026e-10
LCH cells vs monocytes/macrophages	LCH cells	Mono./mac.	LDHB	0.354923	2.62569e-10	4.94838e-06
LCH cells vs monocytes/macrophages	LCH cells	Mono./mac.	TMEM14A	0.354475	5.27956e-18	9.94987e-14
LCH cells vs monocytes/macrophages	LCH cells	Mono./mac.	PRMT1	0.353588	7.83706e-25	1.47697e-20
LCH cells vs monocytes/macrophages	LCH cells	Mono./mac.	RNF5	0.352271	7.96878e-24	1.5018e-19
LCH cells vs monocytes/macrophages	LCH cells	Mono./mac.	CLEC10A	0.349252	2.68104e-12	5.05268e-08
LCH cells vs monocytes/macrophages	LCH cells	Mono./mac.	CLDND1	0.346468	9.31965e-20	1.75638e-15
LCH cells vs monocytes/macrophages	LCH cells	Mono./mac.	LGALS1	0.344772	1.01633e-11	1.91538e-07
LCH cells vs monocytes/macrophages	LCH cells	Mono./mac.	COX5A	0.342425	5.61244e-19	1.05772e-14
LCH cells vs monocytes/macrophages	LCH cells	Mono./mac.	NAA10	0.34157	5.96889e-18	1.1249e-13
LCH cells vs monocytes/macrophages	LCH cells	Mono./mac.	CLTB	0.341333	1.0346e-24	1.94981e-20
LCH cells vs monocytes/macrophages	LCH cells	Mono./mac.	FFAR4	0.340935	7.12484e-19	1.34275e-14
LCH cells vs monocytes/macrophages	LCH cells	Mono./mac.	CBR3	0.339261	6.18913e-15	1.1664e-10
LCH cells vs monocytes/macrophages	LCH cells	Mono./mac.	SLC38A1	0.338799	6.65846e-23	1.25485e-18
LCH cells vs monocytes/macrophages	LCH cells	Mono./mac.	BAIAP2	0.338426	6.8782e-18	1.29627e-13
LCH cells vs monocytes/macrophages	LCH cells	Mono./mac.	DCXR	0.338149	6.17766e-18	1.16424e-13
LCH cells vs monocytes/macrophages	LCH cells	Mono./mac.	NUCKS1	0.337883	1.4245e-18	2.68462e-14
LCH cells vs monocytes/macrophages	LCH cells	Mono./mac.	FAM109A	0.337666	2.07145e-13	3.90386e-09
LCH cells vs monocytes/macrophages	LCH cells	Mono./mac.	CD58	0.336503	8.89028e-23	1.67546e-18
LCH cells vs monocytes/macrophages	LCH cells	Mono./mac.	RPL15	0.336474	1.26025e-41	2.37507e-37
LCH cells vs monocytes/macrophages	LCH cells	Mono./mac.	PCNA	0.33396	7.14002e-13	1.34561e-08
LCH cells vs monocytes/macrophages	LCH cells	Mono./mac.	CAP1	0.333688	9.02327e-14	1.70052e-09
LCH cells vs monocytes/macrophages	LCH cells	Mono./mac.	PDLIM7	0.333468	5.22768e-17	9.85208e-13
LCH cells vs monocytes/macrophages	LCH cells	Mono./mac.	RPS11	0.332984	1.55201e-33	2.92492e-29
LCH cells vs monocytes/macrophages	LCH cells	Mono./mac.	PON2	0.331022	3.36675e-12	6.34497e-08
LCH cells vs monocytes/macrophages	LCH cells	Mono./mac.	NME1	0.330048	9.1703e-18	1.72823e-13
LCH cells vs monocytes/macrophages	LCH cells	Mono./mac.	MZT2A	0.329098	1.62813e-18	3.06837e-14
LCH cells vs monocytes/macrophages	LCH cells	Mono./mac.	CYB5B	0.325633	2.41081e-14	4.54342e-10
LCH cells vs monocytes/macrophages	LCH cells	Mono./mac.	TIGAR	0.324597	2.36932e-20	4.46522e-16
LCH cells vs monocytes/macrophages	LCH cells	Mono./mac.	GNAI1	0.321186	7.33647e-18	1.38263e-13
LCH cells vs monocytes/macrophages	LCH cells	Mono./mac.	ASPH	0.321158	1.03753e-18	1.95532e-14
LCH cells vs monocytes/macrophages	LCH cells	Mono./mac.	IVNS1ABP	0.32026	6.95398e-16	1.31055e-11
LCH cells vs monocytes/macrophages	LCH cells	Mono./mac.	UCHL3	0.31981	4.52963e-22	8.53654e-18
LCH cells vs monocytes/macrophages	LCH cells	Mono./mac.	DCTPP1	0.318717	3.47963e-16	6.5577e-12
LCH cells vs monocytes/macrophages	LCH cells	Mono./mac.	ARF6	0.318373	4.05663e-14	7.64512e-10
LCH cells vs monocytes/macrophages	LCH cells	Mono./mac.	RPL3	0.312166	3.67217e-33	6.92057e-29
LCH cells vs monocytes/macrophages	LCH cells	Mono./mac.	TSTD1	0.311952	1.98284e-18	3.73685e-14
LCH cells vs monocytes/macrophages	LCH cells	Mono./mac.	SLC39A13	0.309717	8.83899e-12	1.6658e-07
LCH cells vs monocytes/macrophages	LCH cells	Mono./mac.	DUSP2	0.307798	1.31461e-09	2.47752e-05
LCH cells vs monocytes/macrophages	LCH cells	Mono./mac.	HPGD	0.306665	1.34742e-11	2.53935e-07
LCH cells vs monocytes/macrophages	LCH cells	Mono./mac.	RASL10A	0.305598	1.75604e-12	3.30944e-08
LCH cells vs monocytes/macrophages	LCH cells	Mono./mac.	CSF1R	0.305303	4.09613e-15	7.71957e-11
LCH cells vs monocytes/macrophages	LCH cells	Mono./mac.	MYO6	0.304482	1.05118e-18	1.98105e-14
LCH cells vs monocytes/macrophages	LCH cells	Mono./mac.	MKI67	0.301022	2.85231e-08	0.000537546
LCH cells vs monocytes/macrophages	LCH cells	Mono./mac.	UPF2	0.296219	5.70036e-12	1.07429e-07
LCH cells vs monocytes/macrophages	LCH cells	Mono./mac.	MLF2	0.29432	1.71195e-16	3.22635e-12
LCH cells vs monocytes/macrophages	LCH cells	Mono./mac.	ACTR3	0.286071	1.16444e-14	2.19449e-10
LCH cells vs monocytes/macrophages	LCH cells	Mono./mac.	C11orf31	0.285502	4.73723e-16	8.92779e-12
LCH cells vs monocytes/macrophages	LCH cells	Mono./mac.	RPS6	0.284913	1.59676e-34	3.00925e-30
LCH cells vs monocytes/macrophages	LCH cells	Mono./mac.	YWHAE	0.280011	3.58817e-17	6.76227e-13
LCH cells vs monocytes/macrophages	LCH cells	Mono./mac.	HIP1	0.278222	9.83319e-11	1.85316e-06
LCH cells vs monocytes/macrophages	LCH cells	Mono./mac.	BAX	0.277357	5.59112e-11	1.0537e-06
LCH cells vs monocytes/macrophages	LCH cells	Mono./mac.	C12orf57	0.276474	8.43714e-13	1.59006e-08
LCH cells vs monocytes/macrophages	LCH cells	Mono./mac.	CTNND1	0.272669	1.59452e-12	3.00502e-08
LCH cells vs monocytes/macrophages	LCH cells	Mono./mac.	RP11-350J20.12	0.269732	1.1623e-12	2.19047e-08
LCH cells vs monocytes/macrophages	LCH cells	Mono./mac.	RPL12	0.261846	1.76415e-25	3.32472e-21
LCH cells vs monocytes/macrophages	LCH cells	Mono./mac.	PFKP	0.256484	1.55109e-11	2.92318e-07
LCH cells vs monocytes/macrophages	LCH cells	Mono./mac.	SERPINF1	0.187589	4.00339e-08	0.00075448
LCH cells vs monocytes/macrophages	Mono./mac.	LCH cells	LRP1	-0.26339	1.16096e-20	2.18795e-16
LCH cells vs monocytes/macrophages	Mono./mac.	LCH cells	NOTCH2	-0.276105	5.17554e-10	9.75383e-06
LCH cells vs monocytes/macrophages	Mono./mac.	LCH cells	TCIRG1	-0.284774	9.51811e-14	1.79378e-09
LCH cells vs monocytes/macrophages	Mono./mac.	LCH cells	SLAMF7	-0.285245	4.17192e-27	7.86241e-23
LCH cells vs monocytes/macrophages	Mono./mac.	LCH cells	BST1	-0.292527	1.71586e-23	3.23371e-19
LCH cells vs monocytes/macrophages	Mono./mac.	LCH cells	RNF13	-0.293876	4.19968e-08	0.000791471
LCH cells vs monocytes/macrophages	Mono./mac.	LCH cells	SLC2A6	-0.304125	8.94241e-31	1.68529e-26
LCH cells vs monocytes/macrophages	Mono./mac.	LCH cells	PLAC8	-0.307758	1.85874e-20	3.50298e-16
LCH cells vs monocytes/macrophages	Mono./mac.	LCH cells	TREM1	-0.311803	1.9061e-108	3.59223e-104
LCH cells vs monocytes/macrophages	Mono./mac.	LCH cells	APP	-0.313656	2.40949e-32	4.54093e-28
LCH cells vs monocytes/macrophages	Mono./mac.	LCH cells	PTPN1	-0.315117	6.20123e-10	1.16868e-05
LCH cells vs monocytes/macrophages	Mono./mac.	LCH cells	TMBIM4	-0.316856	3.30177e-10	6.22251e-06
LCH cells vs monocytes/macrophages	Mono./mac.	LCH cells	RENBP	-0.318913	4.14195e-18	7.80592e-14
LCH cells vs monocytes/macrophages	Mono./mac.	LCH cells	NAIP	-0.3203	5.03942e-17	9.49728e-13
LCH cells vs monocytes/macrophages	Mono./mac.	LCH cells	GIMAP1	-0.323822	3.01969e-57	5.69091e-53
LCH cells vs monocytes/macrophages	Mono./mac.	LCH cells	NPL	-0.327335	3.20423e-32	6.03869e-28
LCH cells vs monocytes/macrophages	Mono./mac.	LCH cells	LILRB1	-0.333354	1.04573e-44	1.97078e-40
LCH cells vs monocytes/macrophages	Mono./mac.	LCH cells	CCR1	-0.336059	1.91619e-26	3.61126e-22
LCH cells vs monocytes/macrophages	Mono./mac.	LCH cells	SCARB2	-0.339524	1.59378e-17	3.00364e-13
LCH cells vs monocytes/macrophages	Mono./mac.	LCH cells	PLTP	-0.34338	4.41684e-09	8.32397e-05
LCH cells vs monocytes/macrophages	Mono./mac.	LCH cells	MPP1	-0.343804	1.60389e-16	3.02269e-12
LCH cells vs monocytes/macrophages	Mono./mac.	LCH cells	LILRB3	-0.345113	2.05032e-38	3.86403e-34
LCH cells vs monocytes/macrophages	Mono./mac.	LCH cells	ACP5	-0.345864	9.58244e-20	1.80591e-15
LCH cells vs monocytes/macrophages	Mono./mac.	LCH cells	SERP1	-0.347522	1.03078e-14	1.94261e-10
LCH cells vs monocytes/macrophages	Mono./mac.	LCH cells	STAT1	-0.352677	3.85793e-09	7.27066e-05
LCH cells vs monocytes/macrophages	Mono./mac.	LCH cells	SPHK1	-0.353172	1.5638e-78	2.94715e-74
LCH cells vs monocytes/macrophages	Mono./mac.	LCH cells	TFEC	-0.353255	1.02173e-35	1.92556e-31
LCH cells vs monocytes/macrophages	Mono./mac.	LCH cells	PLXDC2	-0.355806	1.4848e-13	2.79825e-09
LCH cells vs monocytes/macrophages	Mono./mac.	LCH cells	ODF3B	-0.357446	2.62789e-24	4.95252e-20
LCH cells vs monocytes/macrophages	Mono./mac.	LCH cells	DNASE2	-0.358556	1.53715e-21	2.89691e-17
LCH cells vs monocytes/macrophages	Mono./mac.	LCH cells	PTGIR	-0.358873	4.25263e-51	8.01451e-47
LCH cells vs monocytes/macrophages	Mono./mac.	LCH cells	UBE2D1	-0.359698	2.57553e-08	0.000485384
LCH cells vs monocytes/macrophages	Mono./mac.	LCH cells	PID1	-0.360307	4.47852e-116	8.44023e-112
LCH cells vs monocytes/macrophages	Mono./mac.	LCH cells	TIMP2	-0.362081	2.96914e-56	5.59564e-52
LCH cells vs monocytes/macrophages	Mono./mac.	LCH cells	GYPC	-0.362208	2.28888e-33	4.31362e-29
LCH cells vs monocytes/macrophages	Mono./mac.	LCH cells	HLA-F	-0.362736	8.62872e-11	1.62617e-06
LCH cells vs monocytes/macrophages	Mono./mac.	LCH cells	GK	-0.365482	2.95647e-13	5.57176e-09
LCH cells vs monocytes/macrophages	Mono./mac.	LCH cells	TMEM205	-0.369613	4.97955e-14	9.38446e-10
LCH cells vs monocytes/macrophages	Mono./mac.	LCH cells	SLC43A2	-0.373691	1.62534e-16	3.06312e-12
LCH cells vs monocytes/macrophages	Mono./mac.	LCH cells	SQRDL	-0.376352	7.3242e-19	1.38032e-14
LCH cells vs monocytes/macrophages	Mono./mac.	LCH cells	ZFAND5	-0.377196	2.17577e-07	0.00410045
LCH cells vs monocytes/macrophages	Mono./mac.	LCH cells	TMEM167A	-0.377354	4.43738e-09	8.3627e-05
LCH cells vs monocytes/macrophages	Mono./mac.	LCH cells	LAMP2	-0.377591	5.12729e-10	9.66289e-06
LCH cells vs monocytes/macrophages	Mono./mac.	LCH cells	SLC11A1	-0.37803	6.16334e-82	1.16154e-77
LCH cells vs monocytes/macrophages	Mono./mac.	LCH cells	CLEC7A	-0.381821	1.52939e-07	0.00288228
LCH cells vs monocytes/macrophages	Mono./mac.	LCH cells	CCR2	-0.383747	1.10696e-87	2.08618e-83
LCH cells vs monocytes/macrophages	Mono./mac.	LCH cells	DPYD	-0.384892	2.48312e-64	4.67968e-60
LCH cells vs monocytes/macrophages	Mono./mac.	LCH cells	BNIP3L	-0.391353	3.28796e-11	6.1965e-07
LCH cells vs monocytes/macrophages	Mono./mac.	LCH cells	CD44	-0.393561	1.91587e-15	3.61064e-11
LCH cells vs monocytes/macrophages	Mono./mac.	LCH cells	NAGK	-0.393859	1.5383e-15	2.89907e-11
LCH cells vs monocytes/macrophages	Mono./mac.	LCH cells	TSPO	-0.395084	1.78408e-07	0.00336228
LCH cells vs monocytes/macrophages	Mono./mac.	LCH cells	KMO	-0.395654	6.30527e-15	1.18829e-10
LCH cells vs monocytes/macrophages	Mono./mac.	LCH cells	HNMT	-0.397255	2.75574e-13	5.19347e-09
LCH cells vs monocytes/macrophages	Mono./mac.	LCH cells	LY96	-0.401198	5.08043e-18	9.57458e-14
LCH cells vs monocytes/macrophages	Mono./mac.	LCH cells	CTSA	-0.402318	1.82105e-16	3.43195e-12
LCH cells vs monocytes/macrophages	Mono./mac.	LCH cells	VMP1	-0.405873	7.91158e-18	1.49102e-13
LCH cells vs monocytes/macrophages	Mono./mac.	LCH cells	TNFAIP2	-0.407568	7.70731e-19	1.45252e-14
LCH cells vs monocytes/macrophages	Mono./mac.	LCH cells	SERPINB9	-0.409709	8.75137e-13	1.64928e-08
LCH cells vs monocytes/macrophages	Mono./mac.	LCH cells	STAB1	-0.414535	2.13792e-112	4.02912e-108
LCH cells vs monocytes/macrophages	Mono./mac.	LCH cells	CECR1	-0.421115	2.1339e-29	4.02155e-25
LCH cells vs monocytes/macrophages	Mono./mac.	LCH cells	PLD3	-0.424117	5.11928e-13	9.6478e-09
LCH cells vs monocytes/macrophages	Mono./mac.	LCH cells	CLEC12A	-0.425554	2.92594e-30	5.51423e-26
LCH cells vs monocytes/macrophages	Mono./mac.	LCH cells	FCGR2A	-0.426522	1.71547e-21	3.23298e-17
LCH cells vs monocytes/macrophages	Mono./mac.	LCH cells	LIPA	-0.42852	1.19064e-20	2.24388e-16
LCH cells vs monocytes/macrophages	Mono./mac.	LCH cells	PTAFR	-0.430762	6.987e-19	1.31677e-14
LCH cells vs monocytes/macrophages	Mono./mac.	LCH cells	GPX4	-0.435569	2.06185e-09	3.88577e-05
LCH cells vs monocytes/macrophages	Mono./mac.	LCH cells	CYP27A1	-0.435575	2.23913e-104	4.21987e-100
LCH cells vs monocytes/macrophages	Mono./mac.	LCH cells	LIMD2	-0.43677	2.8624e-18	5.39447e-14
LCH cells vs monocytes/macrophages	Mono./mac.	LCH cells	CD300E	-0.438144	3.53496e-38	6.66199e-34
LCH cells vs monocytes/macrophages	Mono./mac.	LCH cells	DRAM1	-0.439457	7.09428e-95	1.33699e-90
LCH cells vs monocytes/macrophages	Mono./mac.	LCH cells	GRN	-0.440558	2.70206e-29	5.0923e-25
LCH cells vs monocytes/macrophages	Mono./mac.	LCH cells	IFI30	-0.44095	2.54717e-09	4.8004e-05
LCH cells vs monocytes/macrophages	Mono./mac.	LCH cells	ATP6V1B2	-0.441001	1.46441e-15	2.75982e-11
LCH cells vs monocytes/macrophages	Mono./mac.	LCH cells	BRI3	-0.441481	5.53092e-18	1.04236e-13
LCH cells vs monocytes/macrophages	Mono./mac.	LCH cells	AGTRAP	-0.44504	5.22793e-20	9.85256e-16
LCH cells vs monocytes/macrophages	Mono./mac.	LCH cells	DMXL2	-0.44901	5.0033e-120	9.42922e-116
LCH cells vs monocytes/macrophages	Mono./mac.	LCH cells	GSTO1	-0.450662	1.20647e-29	2.27372e-25
LCH cells vs monocytes/macrophages	Mono./mac.	LCH cells	GNS	-0.454585	1.31842e-51	2.48469e-47
LCH cells vs monocytes/macrophages	Mono./mac.	LCH cells	FPR3	-0.45587	1.27849e-09	2.40944e-05
LCH cells vs monocytes/macrophages	Mono./mac.	LCH cells	HLA-C	-0.457421	9.70615e-40	1.82922e-35
LCH cells vs monocytes/macrophages	Mono./mac.	LCH cells	LAIR1	-0.459504	7.18287e-114	1.35368e-109
LCH cells vs monocytes/macrophages	Mono./mac.	LCH cells	TLR2	-0.459593	1.31698e-64	2.48198e-60
LCH cells vs monocytes/macrophages	Mono./mac.	LCH cells	SDCBP	-0.460482	1.70021e-28	3.20421e-24
LCH cells vs monocytes/macrophages	Mono./mac.	LCH cells	APOBEC3A	-0.464126	4.55307e-84	8.58071e-80
LCH cells vs monocytes/macrophages	Mono./mac.	LCH cells	B2M	-0.469522	3.97898e-60	7.49878e-56
LCH cells vs monocytes/macrophages	Mono./mac.	LCH cells	MPEG1	-0.47282	2.9812e-20	5.61837e-16
LCH cells vs monocytes/macrophages	Mono./mac.	LCH cells	HLA-E	-0.480631	7.86454e-33	1.48215e-28
LCH cells vs monocytes/macrophages	Mono./mac.	LCH cells	MCEMP1	-0.48129	1.46424e-146	2.7595e-142
LCH cells vs monocytes/macrophages	Mono./mac.	LCH cells	FGL2	-0.483525	3.39374e-22	6.39584e-18
LCH cells vs monocytes/macrophages	Mono./mac.	LCH cells	ASGR1	-0.486598	3.88097e-56	7.31407e-52
LCH cells vs monocytes/macrophages	Mono./mac.	LCH cells	LINC01272	-0.486992	4.47655e-89	8.43651e-85
LCH cells vs monocytes/macrophages	Mono./mac.	LCH cells	MGST1	-0.488178	2.69824e-192	5.08511e-188
LCH cells vs monocytes/macrophages	Mono./mac.	LCH cells	CYBB	-0.488689	2.37077e-37	4.46796e-33
LCH cells vs monocytes/macrophages	Mono./mac.	LCH cells	ATP6V1F	-0.489316	1.62818e-19	3.06846e-15
LCH cells vs monocytes/macrophages	Mono./mac.	LCH cells	HEXB	-0.489524	1.84464e-13	3.47642e-09
LCH cells vs monocytes/macrophages	Mono./mac.	LCH cells	MT1E	-0.491301	6.67565e-34	1.25809e-29
LCH cells vs monocytes/macrophages	Mono./mac.	LCH cells	RAB13	-0.492771	8.31513e-14	1.56707e-09
LCH cells vs monocytes/macrophages	Mono./mac.	LCH cells	SNX10	-0.502527	6.69481e-11	1.2617e-06
LCH cells vs monocytes/macrophages	Mono./mac.	LCH cells	BLVRB	-0.515614	2.09213e-23	3.94282e-19
LCH cells vs monocytes/macrophages	Mono./mac.	LCH cells	C3AR1	-0.517887	2.0584e-19	3.87927e-15
LCH cells vs monocytes/macrophages	Mono./mac.	LCH cells	CEBPD	-0.526638	7.23994e-18	1.36444e-13
LCH cells vs monocytes/macrophages	Mono./mac.	LCH cells	CSF3R	-0.529871	1.14809e-88	2.16368e-84
LCH cells vs monocytes/macrophages	Mono./mac.	LCH cells	NUP214	-0.534081	1.07787e-41	2.03136e-37
LCH cells vs monocytes/macrophages	Mono./mac.	LCH cells	GSTP1	-0.537577	1.46098e-21	2.75337e-17
LCH cells vs monocytes/macrophages	Mono./mac.	LCH cells	BLVRA	-0.541965	5.4595e-48	1.0289e-43
LCH cells vs monocytes/macrophages	Mono./mac.	LCH cells	NRG1	-0.54213	2.1993e-241	4.14481e-237
LCH cells vs monocytes/macrophages	Mono./mac.	LCH cells	TNFRSF1B	-0.547378	3.78557e-43	7.13429e-39
LCH cells vs monocytes/macrophages	Mono./mac.	LCH cells	FCGR1A	-0.554354	3.75222e-34	7.07143e-30
LCH cells vs monocytes/macrophages	Mono./mac.	LCH cells	NEAT1	-0.562251	1.57735e-43	2.97266e-39
LCH cells vs monocytes/macrophages	Mono./mac.	LCH cells	CYBA	-0.57255	3.76048e-80	7.087e-76
LCH cells vs monocytes/macrophages	Mono./mac.	LCH cells	HLA-A	-0.576781	1.50688e-50	2.83986e-46
LCH cells vs monocytes/macrophages	Mono./mac.	LCH cells	PLIN2	-0.578139	1.35987e-25	2.5628e-21
LCH cells vs monocytes/macrophages	Mono./mac.	LCH cells	NAMPT	-0.578256	1.65656e-12	3.12196e-08
LCH cells vs monocytes/macrophages	Mono./mac.	LCH cells	KCTD12	-0.586072	8.16973e-23	1.53967e-18
LCH cells vs monocytes/macrophages	Mono./mac.	LCH cells	HLA-B	-0.591477	1.48893e-65	2.80604e-61
LCH cells vs monocytes/macrophages	Mono./mac.	LCH cells	ZFP36L2	-0.595324	1.33094e-17	2.5083e-13
LCH cells vs monocytes/macrophages	Mono./mac.	LCH cells	TBXAS1	-0.595497	1.27172e-146	2.39667e-142
LCH cells vs monocytes/macrophages	Mono./mac.	LCH cells	PNRC1	-0.601755	5.28383e-24	9.9579e-20
LCH cells vs monocytes/macrophages	Mono./mac.	LCH cells	PLBD1	-0.605353	3.06533e-53	5.77692e-49
LCH cells vs monocytes/macrophages	Mono./mac.	LCH cells	SERPINB1	-0.610261	8.96432e-43	1.68942e-38
LCH cells vs monocytes/macrophages	Mono./mac.	LCH cells	MARCO	-0.611314	7.16183e-29	1.34972e-24
LCH cells vs monocytes/macrophages	Mono./mac.	LCH cells	AQP9	-0.614856	4.87076e-230	9.17943e-226
LCH cells vs monocytes/macrophages	Mono./mac.	LCH cells	DUSP6	-0.621652	1.13889e-19	2.14635e-15
LCH cells vs monocytes/macrophages	Mono./mac.	LCH cells	KYNU	-0.622179	8.02586e-21	1.51255e-16
LCH cells vs monocytes/macrophages	Mono./mac.	LCH cells	LGMN	-0.625174	1.31053e-19	2.46983e-15
LCH cells vs monocytes/macrophages	Mono./mac.	LCH cells	CREG1	-0.62834	2.41738e-47	4.5558e-43
LCH cells vs monocytes/macrophages	Mono./mac.	LCH cells	NINJ1	-0.631044	2.62645e-21	4.94981e-17
LCH cells vs monocytes/macrophages	Mono./mac.	LCH cells	MS4A6A	-0.635712	1.24643e-34	2.34903e-30
LCH cells vs monocytes/macrophages	Mono./mac.	LCH cells	CARD16	-0.648255	3.26159e-39	6.1468e-35
LCH cells vs monocytes/macrophages	Mono./mac.	LCH cells	ALDH2	-0.650047	4.76573e-15	8.9815e-11
LCH cells vs monocytes/macrophages	Mono./mac.	LCH cells	HMOX1	-0.654705	7.57174e-31	1.42697e-26
LCH cells vs monocytes/macrophages	Mono./mac.	LCH cells	PLEK	-0.655716	1.74218e-34	3.28332e-30
LCH cells vs monocytes/macrophages	Mono./mac.	LCH cells	RNF130	-0.656109	4.60231e-55	8.67352e-51
LCH cells vs monocytes/macrophages	Mono./mac.	LCH cells	LILRB4	-0.659123	4.85779e-158	9.15498e-154
LCH cells vs monocytes/macrophages	Mono./mac.	LCH cells	STXBP2	-0.659364	2.60646e-19	4.91213e-15
LCH cells vs monocytes/macrophages	Mono./mac.	LCH cells	C10orf54	-0.660762	5.97116e-44	1.12533e-39
LCH cells vs monocytes/macrophages	Mono./mac.	LCH cells	VSIG4	-0.662395	6.89392e-55	1.29923e-50
LCH cells vs monocytes/macrophages	Mono./mac.	LCH cells	RNASE2	-0.667101	1.17755e-269	2.21921e-265
LCH cells vs monocytes/macrophages	Mono./mac.	LCH cells	LILRB2	-0.674926	1.36162e-203	2.56611e-199
LCH cells vs monocytes/macrophages	Mono./mac.	LCH cells	MS4A4A	-0.694115	1.07492e-46	2.02579e-42
LCH cells vs monocytes/macrophages	Mono./mac.	LCH cells	TXNIP	-0.69822	7.77263e-20	1.46483e-15
LCH cells vs monocytes/macrophages	Mono./mac.	LCH cells	CFP	-0.69839	1.29224e-42	2.43535e-38
LCH cells vs monocytes/macrophages	Mono./mac.	LCH cells	HCST	-0.705678	2.38574e-36	4.49616e-32
LCH cells vs monocytes/macrophages	Mono./mac.	LCH cells	AOAH	-0.713575	1.828e-215	3.44505e-211
LCH cells vs monocytes/macrophages	Mono./mac.	LCH cells	APLP2	-0.719783	7.64388e-44	1.44056e-39
LCH cells vs monocytes/macrophages	Mono./mac.	LCH cells	SLC7A7	-0.743509	7.73013e-162	1.45682e-157
LCH cells vs monocytes/macrophages	Mono./mac.	LCH cells	MT1F	-0.7519	8.47294e-37	1.59681e-32
LCH cells vs monocytes/macrophages	Mono./mac.	LCH cells	CD48	-0.764107	1.12549e-65	2.1211e-61
LCH cells vs monocytes/macrophages	Mono./mac.	LCH cells	PILRA	-0.778376	9.45411e-89	1.78172e-84
LCH cells vs monocytes/macrophages	Mono./mac.	LCH cells	OLR1	-0.787601	1.02829e-192	1.93792e-188
LCH cells vs monocytes/macrophages	Mono./mac.	LCH cells	CEBPB	-0.793521	8.01828e-53	1.51112e-48
LCH cells vs monocytes/macrophages	Mono./mac.	LCH cells	ZEB2	-0.797355	5.21497e-62	9.82814e-58
LCH cells vs monocytes/macrophages	Mono./mac.	LCH cells	GIMAP7	-0.800352	1.16016e-209	2.18644e-205
LCH cells vs monocytes/macrophages	Mono./mac.	LCH cells	BCL2A1	-0.811007	9.37146e-11	1.76615e-06
LCH cells vs monocytes/macrophages	Mono./mac.	LCH cells	GIMAP4	-0.812792	2.74367e-115	5.17072e-111
LCH cells vs monocytes/macrophages	Mono./mac.	LCH cells	RP11-1143G9.4	-0.812924	1.63637e-83	3.08391e-79
LCH cells vs monocytes/macrophages	Mono./mac.	LCH cells	MAFB	-0.822035	1.11741e-115	2.10587e-111
LCH cells vs monocytes/macrophages	Mono./mac.	LCH cells	MARCKS	-0.822923	2.8014e-34	5.27952e-30
LCH cells vs monocytes/macrophages	Mono./mac.	LCH cells	VAMP5	-0.825115	1.35081e-93	2.54573e-89
LCH cells vs monocytes/macrophages	Mono./mac.	LCH cells	FPR1	-0.828246	4.45211e-112	8.39044e-108
LCH cells vs monocytes/macrophages	Mono./mac.	LCH cells	ADAMDEC1	-0.835745	9.59169e-71	1.80765e-66
LCH cells vs monocytes/macrophages	Mono./mac.	LCH cells	CD163	-0.841611	3.57984e-281	6.74657e-277
LCH cells vs monocytes/macrophages	Mono./mac.	LCH cells	FYB	-0.844095	2.70138e-66	5.09103e-62
LCH cells vs monocytes/macrophages	Mono./mac.	LCH cells	ASAH1	-0.857567	3.82259e-58	7.20404e-54
LCH cells vs monocytes/macrophages	Mono./mac.	LCH cells	RNASE1	-0.866381	1.85181e-28	3.48992e-24
LCH cells vs monocytes/macrophages	Mono./mac.	LCH cells	FCGR3A	-0.920583	1.2122e-118	2.28452e-114
LCH cells vs monocytes/macrophages	Mono./mac.	LCH cells	CXCR4	-0.923334	7.6153e-32	1.43518e-27
LCH cells vs monocytes/macrophages	Mono./mac.	LCH cells	NKG7	-0.927069	6.22677e-104	1.1735e-99
LCH cells vs monocytes/macrophages	Mono./mac.	LCH cells	MS4A7	-0.957821	3.67158e-103	6.91947e-99
LCH cells vs monocytes/macrophages	Mono./mac.	LCH cells	SERPINA1	-0.959656	2.0722e-99	3.90526e-95
LCH cells vs monocytes/macrophages	Mono./mac.	LCH cells	SRGN	-0.989104	1.40585e-64	2.64947e-60
LCH cells vs monocytes/macrophages	Mono./mac.	LCH cells	CD68	-0.994395	1.50304e-60	2.83264e-56
LCH cells vs monocytes/macrophages	Mono./mac.	LCH cells	LGALS3	-1.00171	5.4337e-95	1.02404e-90
LCH cells vs monocytes/macrophages	Mono./mac.	LCH cells	CXCL10	-1.01121	3.66335e-09	6.90396e-05
LCH cells vs monocytes/macrophages	Mono./mac.	LCH cells	CTSS	-1.02022	2.71461e-97	5.11595e-93
LCH cells vs monocytes/macrophages	Mono./mac.	LCH cells	CTSD	-1.02832	2.54553e-59	4.7973e-55
LCH cells vs monocytes/macrophages	Mono./mac.	LCH cells	CD36	-1.03095	0	0
LCH cells vs monocytes/macrophages	Mono./mac.	LCH cells	TMEM176A	-1.03952	4.44307e-223	8.37341e-219
LCH cells vs monocytes/macrophages	Mono./mac.	LCH cells	LTA4H	-1.04359	2.6376e-71	4.97081e-67
LCH cells vs monocytes/macrophages	Mono./mac.	LCH cells	CTSL	-1.074	2.82413e-173	5.32236e-169
LCH cells vs monocytes/macrophages	Mono./mac.	LCH cells	CTSB	-1.09663	1.03124e-45	1.94347e-41
LCH cells vs monocytes/macrophages	Mono./mac.	LCH cells	TYMP	-1.10275	2.96332e-91	5.58467e-87
LCH cells vs monocytes/macrophages	Mono./mac.	LCH cells	TNFSF13B	-1.10794	1.58576e-168	2.98852e-164
LCH cells vs monocytes/macrophages	Mono./mac.	LCH cells	CCL3L3	-1.10999	6.38364e-27	1.20306e-22
LCH cells vs monocytes/macrophages	Mono./mac.	LCH cells	CLEC4E	-1.11733	0	0
LCH cells vs monocytes/macrophages	Mono./mac.	LCH cells	SAT1	-1.12613	2.36765e-73	4.46208e-69
LCH cells vs monocytes/macrophages	Mono./mac.	LCH cells	CFD	-1.18419	3.84816e-307	7.25224e-303
LCH cells vs monocytes/macrophages	Mono./mac.	LCH cells	MT1X	-1.19329	5.4351e-09	0.00010243
LCH cells vs monocytes/macrophages	Mono./mac.	LCH cells	MNDA	-1.20604	1.39926e-77	2.63704e-73
LCH cells vs monocytes/macrophages	Mono./mac.	LCH cells	CSTA	-1.22449	1.77889e-181	3.3525e-177
LCH cells vs monocytes/macrophages	Mono./mac.	LCH cells	GLUL	-1.27469	1.23249e-90	2.32275e-86
LCH cells vs monocytes/macrophages	Mono./mac.	LCH cells	C1QC	-1.35648	1.00434e-70	1.89279e-66
LCH cells vs monocytes/macrophages	Mono./mac.	LCH cells	PSAP	-1.36915	1.50688e-126	2.83987e-122
LCH cells vs monocytes/macrophages	Mono./mac.	LCH cells	NPC2	-1.3928	2.33876e-134	4.40763e-130
LCH cells vs monocytes/macrophages	Mono./mac.	LCH cells	FTL	-1.42436	1.14373e-144	2.15547e-140
LCH cells vs monocytes/macrophages	Mono./mac.	LCH cells	APOC1	-1.43708	1.16308e-26	2.19194e-22
LCH cells vs monocytes/macrophages	Mono./mac.	LCH cells	TMEM176B	-1.52024	0	0
LCH cells vs monocytes/macrophages	Mono./mac.	LCH cells	VCAN	-1.53419	0	0
LCH cells vs monocytes/macrophages	Mono./mac.	LCH cells	CD14	-1.57385	1.60628e-181	3.02719e-177
LCH cells vs monocytes/macrophages	Mono./mac.	LCH cells	C1QB	-1.58893	1.00694e-70	1.89768e-66
LCH cells vs monocytes/macrophages	Mono./mac.	LCH cells	FTH1	-1.65098	1.08563e-103	2.04598e-99
LCH cells vs monocytes/macrophages	Mono./mac.	LCH cells	MT2A	-1.66907	2.26389e-50	4.26652e-46
LCH cells vs monocytes/macrophages	Mono./mac.	LCH cells	C1QA	-1.70437	1.73397e-66	3.26784e-62
LCH cells vs monocytes/macrophages	Mono./mac.	LCH cells	CCL4	-1.72375	2.49578e-35	4.70355e-31
LCH cells vs monocytes/macrophages	Mono./mac.	LCH cells	S100A12	-1.76918	0	0
LCH cells vs monocytes/macrophages	Mono./mac.	LCH cells	CCL3	-2.01219	2.62859e-94	4.95384e-90
LCH cells vs monocytes/macrophages	Mono./mac.	LCH cells	APOE	-2.14054	9.33095e-15	1.75851e-10
LCH cells vs monocytes/macrophages	Mono./mac.	LCH cells	SOD2	-2.23355	1.53795e-131	2.89842e-127
LCH cells vs monocytes/macrophages	Mono./mac.	LCH cells	FCN1	-2.46409	0	0
LCH cells vs monocytes/macrophages	Mono./mac.	LCH cells	S100A9	-2.85838	7.33559e-209	1.38247e-204
LCH cells vs monocytes/macrophages	Mono./mac.	LCH cells	LYZ	-3.0359	4.10512e-228	7.73651e-224
LCH cells vs monocytes/macrophages	Mono./mac.	LCH cells	S100A8	-3.32792	1.70227e-164	3.2081e-160
LCH cells vs T cells	LCH cells	T cells	CST3	1.63269	0	0
LCH cells vs T cells	LCH cells	T cells	HLA-DRA	1.57613	0	0
LCH cells vs T cells	LCH cells	T cells	CD1A	1.55306	2.45058e-253	4.61836e-249
LCH cells vs T cells	LCH cells	T cells	TACSTD2	1.54587	5.31473e-234	1.00161e-229
LCH cells vs T cells	LCH cells	T cells	FCER1A	1.52409	1.06909e-256	2.01481e-252
LCH cells vs T cells	LCH cells	T cells	MMP9	1.50011	3.21143e-204	6.05226e-200
LCH cells vs T cells	LCH cells	T cells	HLA-DPA1	1.49162	1.11711e-306	2.1053e-302
LCH cells vs T cells	LCH cells	T cells	TYROBP	1.48095	0	0
LCH cells vs T cells	LCH cells	T cells	S100B	1.47609	3.10071e-169	5.8436e-165
LCH cells vs T cells	LCH cells	T cells	HLA-DRB1	1.46936	0	0
LCH cells vs T cells	LCH cells	T cells	HLA-DPB1	1.46504	3.10129e-304	5.8447e-300
LCH cells vs T cells	LCH cells	T cells	HLA-DQA1	1.45627	1.197e-301	2.25587e-297
LCH cells vs T cells	LCH cells	T cells	GSN	1.44526	9.19532e-290	1.73295e-285
LCH cells vs T cells	LCH cells	T cells	FCER1G	1.43108	5.47182e-281	1.03122e-276
LCH cells vs T cells	LCH cells	T cells	CD74	1.42844	0	0
LCH cells vs T cells	LCH cells	T cells	PPM1N	1.41266	6.98598e-242	1.31658e-237
LCH cells vs T cells	LCH cells	T cells	LST1	1.3813	4.92423e-275	9.2802e-271
LCH cells vs T cells	LCH cells	T cells	HLA-DQB1	1.37343	2.61975e-282	4.93718e-278
LCH cells vs T cells	LCH cells	T cells	AIF1	1.36486	1.44866e-275	2.73014e-271
LCH cells vs T cells	LCH cells	T cells	HLA-DQB2	1.36095	2.59195e-172	4.88479e-168
LCH cells vs T cells	LCH cells	T cells	C15orf48	1.35525	6.69038e-206	1.26087e-201
LCH cells vs T cells	LCH cells	T cells	CPVL	1.32324	1.12167e-118	2.11391e-114
LCH cells vs T cells	LCH cells	T cells	SPI1	1.32256	2.43289e-283	4.58502e-279
LCH cells vs T cells	LCH cells	T cells	HLA-DQA2	1.31475	7.89538e-180	1.48796e-175
LCH cells vs T cells	LCH cells	T cells	CD1C	1.31129	1.11379e-204	2.09905e-200
LCH cells vs T cells	LCH cells	T cells	TIMP1	1.29454	1.04588e-256	1.97107e-252
LCH cells vs T cells	LCH cells	T cells	HPGDS	1.26244	3.09905e-216	5.84048e-212
LCH cells vs T cells	LCH cells	T cells	CD207	1.23782	3.92056e-91	7.38868e-87
LCH cells vs T cells	LCH cells	T cells	FCGBP	1.2347	7.99527e-178	1.50679e-173
LCH cells vs T cells	LCH cells	T cells	SPP1	1.23032	2.97842e-12	5.61313e-08
LCH cells vs T cells	LCH cells	T cells	CD1E	1.2163	4.70657e-197	8.87e-193
LCH cells vs T cells	LCH cells	T cells	CAPG	1.18521	6.37706e-254	1.20182e-249
LCH cells vs T cells	LCH cells	T cells	NDRG2	1.16957	2.31888e-213	4.37015e-209
LCH cells vs T cells	LCH cells	T cells	CA2	1.16531	1.90536e-191	3.59084e-187
LCH cells vs T cells	LCH cells	T cells	PKIB	1.14862	7.5583e-227	1.42444e-222
LCH cells vs T cells	LCH cells	T cells	HLA-DMA	1.13576	1.65288e-242	3.11502e-238
LCH cells vs T cells	LCH cells	T cells	CTSH	1.13047	1.15609e-231	2.17876e-227
LCH cells vs T cells	LCH cells	T cells	FCGRT	1.11828	2.9338e-237	5.52904e-233
LCH cells vs T cells	LCH cells	T cells	PLAUR	1.10647	7.93793e-162	1.49598e-157
LCH cells vs T cells	LCH cells	T cells	PLEK2	1.10458	1.3587e-179	2.56061e-175
LCH cells vs T cells	LCH cells	T cells	LMNA	1.09755	7.42285e-162	1.39891e-157
LCH cells vs T cells	LCH cells	T cells	MMP12	1.09554	2.76891e-29	5.21829e-25
LCH cells vs T cells	LCH cells	T cells	HLA-DMB	1.05211	1.12691e-195	2.12377e-191
LCH cells vs T cells	LCH cells	T cells	RNASE6	1.01719	1.06754e-162	2.01188e-158
LCH cells vs T cells	LCH cells	T cells	CD9	1.01241	2.55811e-97	4.82101e-93
LCH cells vs T cells	LCH cells	T cells	CLEC10A	0.973225	4.57124e-121	8.61497e-117
LCH cells vs T cells	LCH cells	T cells	IL22RA2	0.969333	5.66279e-76	1.06721e-71
LCH cells vs T cells	LCH cells	T cells	LGALS1	0.968776	1.96219e-114	3.69794e-110
LCH cells vs T cells	LCH cells	T cells	GRN	0.965841	2.79598e-181	5.2693e-177
LCH cells vs T cells	LCH cells	T cells	GPX1	0.961817	7.59887e-193	1.43208e-188
LCH cells vs T cells	LCH cells	T cells	IFITM3	0.950778	1.03953e-135	1.9591e-131
LCH cells vs T cells	LCH cells	T cells	CKLF	0.947284	1.33141e-193	2.50918e-189
LCH cells vs T cells	LCH cells	T cells	ALOX5AP	0.947085	1.08972e-83	2.05368e-79
LCH cells vs T cells	LCH cells	T cells	IGSF6	0.944029	1.22575e-137	2.31006e-133
LCH cells vs T cells	LCH cells	T cells	SPINK2	0.933204	4.24992e-15	8.00939e-11
LCH cells vs T cells	LCH cells	T cells	RNASET2	0.922788	1.03136e-78	1.94369e-74
LCH cells vs T cells	LCH cells	T cells	CD86	0.908184	1.08251e-171	2.0401e-167
LCH cells vs T cells	LCH cells	T cells	RGS16	0.886633	4.89519e-55	9.22548e-51
LCH cells vs T cells	LCH cells	T cells	RP11-404O13.5	0.884976	7.59558e-104	1.43146e-99
LCH cells vs T cells	LCH cells	T cells	TNF	0.882372	4.90266e-111	9.23955e-107
LCH cells vs T cells	LCH cells	T cells	CSF1R	0.879138	1.44385e-147	2.72108e-143
LCH cells vs T cells	LCH cells	T cells	CTNNBIP1	0.873679	9.54729e-82	1.79928e-77
LCH cells vs T cells	LCH cells	T cells	MS4A6A	0.859106	1.02133e-39	1.9248e-35
LCH cells vs T cells	LCH cells	T cells	IL1B	0.856402	9.59074e-49	1.80747e-44
LCH cells vs T cells	LCH cells	T cells	TMEM14C	0.833295	2.89005e-140	5.44659e-136
LCH cells vs T cells	LCH cells	T cells	ANXA5	0.812541	6.70743e-162	1.26408e-157
LCH cells vs T cells	LCH cells	T cells	PAK1	0.810217	6.52556e-146	1.22981e-141
LCH cells vs T cells	LCH cells	T cells	YWHAH	0.80862	1.70284e-83	3.20916e-79
LCH cells vs T cells	LCH cells	T cells	MNDA	0.8005	2.88653e-63	5.43995e-59
LCH cells vs T cells	LCH cells	T cells	CD63	0.798056	4.31584e-178	8.13362e-174
LCH cells vs T cells	LCH cells	T cells	G0S2	0.788521	1.68916e-10	3.18338e-06
LCH cells vs T cells	LCH cells	T cells	VIM	0.786444	1.40683e-148	2.65132e-144
LCH cells vs T cells	LCH cells	T cells	IFNGR1	0.781275	4.00632e-102	7.55032e-98
LCH cells vs T cells	LCH cells	T cells	CCND1	0.780325	6.13635e-95	1.15646e-90
LCH cells vs T cells	LCH cells	T cells	S100A11	0.775703	5.32662e-199	1.00386e-194
LCH cells vs T cells	LCH cells	T cells	S100A10	0.774227	2.41793e-67	4.55682e-63
LCH cells vs T cells	LCH cells	T cells	PYCARD	0.773874	1.52464e-139	2.87333e-135
LCH cells vs T cells	LCH cells	T cells	EMP1	0.773009	1.89794e-103	3.57687e-99
LCH cells vs T cells	LCH cells	T cells	DBI	0.763436	6.31436e-74	1.19e-69
LCH cells vs T cells	LCH cells	T cells	CST6	0.753079	1.78761e-43	3.36892e-39
LCH cells vs T cells	LCH cells	T cells	TPM2	0.743451	5.20203e-50	9.80374e-46
LCH cells vs T cells	LCH cells	T cells	RAB32	0.742143	9.7633e-111	1.83999e-106
LCH cells vs T cells	LCH cells	T cells	VASP	0.74198	8.42303e-143	1.5874e-138
LCH cells vs T cells	LCH cells	T cells	ANXA2	0.741402	7.88612e-124	1.48622e-119
LCH cells vs T cells	LCH cells	T cells	PTMS	0.740564	4.03474e-120	7.60387e-116
LCH cells vs T cells	LCH cells	T cells	SERPINF1	0.740259	1.69835e-57	3.20072e-53
LCH cells vs T cells	LCH cells	T cells	CD33	0.736227	2.39559e-100	4.51472e-96
LCH cells vs T cells	LCH cells	T cells	CLEC4A	0.733123	1.94453e-114	3.66466e-110
LCH cells vs T cells	LCH cells	T cells	S100A4	0.728363	1.13652e-79	2.14189e-75
LCH cells vs T cells	LCH cells	T cells	IL18	0.727705	1.44716e-105	2.72731e-101
LCH cells vs T cells	LCH cells	T cells	GPR84	0.725059	9.04581e-70	1.70477e-65
LCH cells vs T cells	LCH cells	T cells	SERPINA1	0.721205	3.99442e-39	7.52789e-35
LCH cells vs T cells	LCH cells	T cells	HCK	0.716714	4.24804e-107	8.00586e-103
LCH cells vs T cells	LCH cells	T cells	CD14	0.713039	2.25926e-25	4.25781e-21
LCH cells vs T cells	LCH cells	T cells	CYBB	0.709816	7.25027e-71	1.36639e-66
LCH cells vs T cells	LCH cells	T cells	RAC1	0.699097	1.23658e-156	2.33046e-152
LCH cells vs T cells	LCH cells	T cells	SLC16A3	0.697461	1.68732e-44	3.17993e-40
LCH cells vs T cells	LCH cells	T cells	PHLDA2	0.695803	4.67555e-68	8.81153e-64
LCH cells vs T cells	LCH cells	T cells	FOS	0.69106	1.34892e-40	2.54218e-36
LCH cells vs T cells	LCH cells	T cells	LY86	0.685832	9.13202e-102	1.72102e-97
LCH cells vs T cells	LCH cells	T cells	FGL2	0.679392	2.09697e-78	3.95196e-74
LCH cells vs T cells	LCH cells	T cells	PRDX1	0.671229	7.76241e-107	1.4629e-102
LCH cells vs T cells	LCH cells	T cells	AKR1A1	0.667015	2.23776e-114	4.21728e-110
LCH cells vs T cells	LCH cells	T cells	ALOX5	0.66527	1.91335e-96	3.6059e-92
LCH cells vs T cells	LCH cells	T cells	TRPM4	0.661473	1.83695e-54	3.46192e-50
LCH cells vs T cells	LCH cells	T cells	PPT1	0.660301	1.94865e-94	3.67243e-90
LCH cells vs T cells	LCH cells	T cells	AP1S2	0.660109	1.77287e-56	3.34114e-52
LCH cells vs T cells	LCH cells	T cells	S100A6	0.657569	6.17243e-88	1.16326e-83
LCH cells vs T cells	LCH cells	T cells	MEF2C	0.657208	8.74491e-62	1.64806e-57
LCH cells vs T cells	LCH cells	T cells	SMYD3	0.649741	7.06555e-32	1.33157e-27
LCH cells vs T cells	LCH cells	T cells	FAM26F	0.649093	6.64274e-101	1.25189e-96
LCH cells vs T cells	LCH cells	T cells	GHRL	0.64508	5.30941e-70	1.00061e-65
LCH cells vs T cells	LCH cells	T cells	ATP6AP2	0.644342	1.19909e-82	2.2598e-78
LCH cells vs T cells	LCH cells	T cells	C1orf162	0.642136	2.66837e-69	5.0288e-65
LCH cells vs T cells	LCH cells	T cells	JAML	0.630077	3.5444e-50	6.67977e-46
LCH cells vs T cells	LCH cells	T cells	RGS2	0.626593	1.32228e-62	2.49197e-58
LCH cells vs T cells	LCH cells	T cells	FILIP1L	0.619016	5.13177e-88	9.67133e-84
LCH cells vs T cells	LCH cells	T cells	GCA	0.618363	8.44579e-88	1.59169e-83
LCH cells vs T cells	LCH cells	T cells	ITM2B	0.615355	6.18995e-89	1.16656e-84
LCH cells vs T cells	LCH cells	T cells	LGALS2	0.604764	4.73314e-19	8.92007e-15
LCH cells vs T cells	LCH cells	T cells	CTSS	0.595697	1.45393e-78	2.74008e-74
LCH cells vs T cells	LCH cells	T cells	GPAT3	0.590695	1.39669e-73	2.6322e-69
LCH cells vs T cells	LCH cells	T cells	FTL	0.589837	4.14236e-40	7.80669e-36
LCH cells vs T cells	LCH cells	T cells	OGFRL1	0.586761	1.28907e-73	2.42938e-69
LCH cells vs T cells	LCH cells	T cells	IL1RN	0.584428	9.38774e-18	1.76921e-13
LCH cells vs T cells	LCH cells	T cells	CARD19	0.558415	1.48491e-69	2.79847e-65
LCH cells vs T cells	LCH cells	T cells	NGFRAP1	0.557432	7.75535e-26	1.46157e-21
LCH cells vs T cells	LCH cells	T cells	CDKN2A	0.5562	7.18684e-39	1.35443e-34
LCH cells vs T cells	LCH cells	T cells	SCPEP1	0.55551	1.56594e-54	2.95118e-50
LCH cells vs T cells	LCH cells	T cells	ATP6V0B	0.554205	5.50803e-93	1.03804e-88
LCH cells vs T cells	LCH cells	T cells	TNNT1	0.553354	1.65689e-35	3.12258e-31
LCH cells vs T cells	LCH cells	T cells	SNX3	0.553264	1.58662e-91	2.99014e-87
LCH cells vs T cells	LCH cells	T cells	CXCL16	0.552777	7.95276e-57	1.49878e-52
LCH cells vs T cells	LCH cells	T cells	PVRL2	0.543994	3.55702e-81	6.70355e-77
LCH cells vs T cells	LCH cells	T cells	FCGR2B	0.542826	3.85e-41	7.25571e-37
LCH cells vs T cells	LCH cells	T cells	RXRA	0.538699	6.3099e-53	1.18916e-48
LCH cells vs T cells	LCH cells	T cells	CAMK1	0.536393	9.54506e-39	1.79886e-34
LCH cells vs T cells	LCH cells	T cells	LY96	0.535916	1.10918e-57	2.09035e-53
LCH cells vs T cells	LCH cells	T cells	UBE2E2	0.534622	2.57078e-77	4.8449e-73
LCH cells vs T cells	LCH cells	T cells	TCEAL4	0.526983	8.33484e-82	1.57078e-77
LCH cells vs T cells	LCH cells	T cells	PARM1	0.525911	1.88227e-76	3.54733e-72
LCH cells vs T cells	LCH cells	T cells	36951	0.525148	4.8589e-57	9.15709e-53
LCH cells vs T cells	LCH cells	T cells	P2RY13	0.524956	4.02411e-51	7.58383e-47
LCH cells vs T cells	LCH cells	T cells	MGST2	0.524454	3.20132e-75	6.03321e-71
LCH cells vs T cells	LCH cells	T cells	TRIM13	0.520457	5.555e-40	1.0469e-35
LCH cells vs T cells	LCH cells	T cells	MAP2K1	0.517542	3.96212e-69	7.46701e-65
LCH cells vs T cells	LCH cells	T cells	PTGS1	0.516511	9.00284e-71	1.69668e-66
LCH cells vs T cells	LCH cells	T cells	ZNF385A	0.515296	3.02989e-76	5.71014e-72
LCH cells vs T cells	LCH cells	T cells	TEX30	0.514738	8.51598e-44	1.60492e-39
LCH cells vs T cells	LCH cells	T cells	TGFBI	0.51437	4.32999e-66	8.1603e-62
LCH cells vs T cells	LCH cells	T cells	IFNGR2	0.513811	3.27922e-68	6.18003e-64
LCH cells vs T cells	LCH cells	T cells	NCF1	0.510475	1.77743e-31	3.34975e-27
LCH cells vs T cells	LCH cells	T cells	FSCN1	0.509964	1.73748e-23	3.27446e-19
LCH cells vs T cells	LCH cells	T cells	RGS10	0.507001	1.73915e-72	3.27759e-68
LCH cells vs T cells	LCH cells	T cells	SMCO4	0.504787	1.18829e-62	2.23946e-58
LCH cells vs T cells	LCH cells	T cells	PON2	0.490234	3.82722e-64	7.21278e-60
LCH cells vs T cells	LCH cells	T cells	CCDC88A	0.490121	3.61504e-69	6.81291e-65
LCH cells vs T cells	LCH cells	T cells	H2AFY	0.486367	2.65291e-56	4.99967e-52
LCH cells vs T cells	LCH cells	T cells	VAMP8	0.48622	8.55845e-85	1.61292e-80
LCH cells vs T cells	LCH cells	T cells	CDKN1A	0.483894	2.11863e-43	3.99277e-39
LCH cells vs T cells	LCH cells	T cells	SH3BGRL3	0.483147	4.69057e-78	8.83985e-74
LCH cells vs T cells	LCH cells	T cells	PLAU	0.48228	1.41238e-29	2.66178e-25
LCH cells vs T cells	LCH cells	T cells	FGR	0.481239	4.87564e-59	9.18864e-55
LCH cells vs T cells	LCH cells	T cells	PTPN6	0.480438	1.34836e-51	2.54111e-47
LCH cells vs T cells	LCH cells	T cells	CTNND1	0.478293	1.16769e-49	2.20063e-45
LCH cells vs T cells	LCH cells	T cells	CD68	0.477314	6.49333e-46	1.22373e-41
LCH cells vs T cells	LCH cells	T cells	RPS19	0.476548	1.79274e-152	3.3786e-148
LCH cells vs T cells	LCH cells	T cells	NCF2	0.474095	2.73024e-56	5.14541e-52
LCH cells vs T cells	LCH cells	T cells	TNFAIP8L2	0.470802	1.57077e-59	2.96028e-55
LCH cells vs T cells	LCH cells	T cells	ADAM28	0.470156	1.21546e-59	2.29066e-55
LCH cells vs T cells	LCH cells	T cells	MFSD1	0.469281	2.41342e-54	4.54834e-50
LCH cells vs T cells	LCH cells	T cells	CD302	0.465628	5.38449e-60	1.01476e-55
LCH cells vs T cells	LCH cells	T cells	IL13RA1	0.463532	2.82534e-70	5.32463e-66
LCH cells vs T cells	LCH cells	T cells	CALM2	0.463109	8.73983e-29	1.64711e-24
LCH cells vs T cells	LCH cells	T cells	CTSZ	0.462841	4.48563e-61	8.45361e-57
LCH cells vs T cells	LCH cells	T cells	ZFP36L1	0.457952	2.01559e-52	3.79858e-48
LCH cells vs T cells	LCH cells	T cells	PDXK	0.457631	6.49013e-58	1.22313e-53
LCH cells vs T cells	LCH cells	T cells	GATM	0.453869	2.05368e-38	3.87037e-34
LCH cells vs T cells	LCH cells	T cells	GNA15	0.451715	1.08465e-62	2.04413e-58
LCH cells vs T cells	LCH cells	T cells	LAT2	0.450092	8.90025e-51	1.67734e-46
LCH cells vs T cells	LCH cells	T cells	CSF2RA	0.449806	1.23783e-51	2.33281e-47
LCH cells vs T cells	LCH cells	T cells	CLEC5A	0.449168	1.30039e-54	2.45072e-50
LCH cells vs T cells	LCH cells	T cells	RASGEF1B	0.448066	1.10152e-33	2.07592e-29
LCH cells vs T cells	LCH cells	T cells	CYSLTR1	0.447991	1.219e-54	2.29732e-50
LCH cells vs T cells	LCH cells	T cells	HNMT	0.44661	1.4036e-42	2.64523e-38
LCH cells vs T cells	LCH cells	T cells	ICAM1	0.44453	3.48217e-52	6.56249e-48
LCH cells vs T cells	LCH cells	T cells	SLAMF8	0.444259	1.53303e-57	2.88914e-53
LCH cells vs T cells	LCH cells	T cells	SDC2	0.442381	9.85331e-34	1.85695e-29
LCH cells vs T cells	LCH cells	T cells	SLC29A1	0.442337	4.46516e-23	8.41505e-19
LCH cells vs T cells	LCH cells	T cells	C1orf54	0.440792	1.03415e-26	1.94896e-22
LCH cells vs T cells	LCH cells	T cells	EPS8	0.440445	4.20389e-50	7.92265e-46
LCH cells vs T cells	LCH cells	T cells	RHEB	0.440296	1.09121e-64	2.05649e-60
LCH cells vs T cells	LCH cells	T cells	ASPH	0.439486	8.20619e-61	1.54654e-56
LCH cells vs T cells	LCH cells	T cells	PDLIM7	0.436959	5.63555e-39	1.06208e-34
LCH cells vs T cells	LCH cells	T cells	PGA5	0.434871	2.50644e-17	4.72364e-13
LCH cells vs T cells	LCH cells	T cells	ITGB2	0.433236	4.11749e-39	7.75983e-35
LCH cells vs T cells	LCH cells	T cells	COMT	0.429269	1.17213e-59	2.20899e-55
LCH cells vs T cells	LCH cells	T cells	ADAM8	0.42699	1.52637e-41	2.87659e-37
LCH cells vs T cells	LCH cells	T cells	TSPAN4	0.426239	5.88982e-50	1.11e-45
LCH cells vs T cells	LCH cells	T cells	LGALS12	0.424708	1.66445e-29	3.13683e-25
LCH cells vs T cells	LCH cells	T cells	CLECL1	0.420323	5.38275e-37	1.01443e-32
LCH cells vs T cells	LCH cells	T cells	RTN1	0.417892	8.97612e-49	1.69164e-44
LCH cells vs T cells	LCH cells	T cells	PEA15	0.417491	7.00594e-50	1.32034e-45
LCH cells vs T cells	LCH cells	T cells	SH3BGRL	0.412729	4.64947e-46	8.7624e-42
LCH cells vs T cells	LCH cells	T cells	TMEM8B	0.410215	1.88356e-39	3.54976e-35
LCH cells vs T cells	LCH cells	T cells	CD72	0.409863	2.17058e-30	4.09067e-26
LCH cells vs T cells	LCH cells	T cells	IVNS1ABP	0.408095	5.01275e-47	9.44703e-43
LCH cells vs T cells	LCH cells	T cells	GLRX	0.406052	1.7761e-42	3.34724e-38
LCH cells vs T cells	LCH cells	T cells	ENG	0.405736	2.98023e-46	5.61655e-42
LCH cells vs T cells	LCH cells	T cells	PRCP	0.403242	6.26593e-57	1.18088e-52
LCH cells vs T cells	LCH cells	T cells	CD58	0.403015	4.26603e-34	8.03976e-30
LCH cells vs T cells	LCH cells	T cells	TIGAR	0.396058	1.03807e-38	1.95635e-34
LCH cells vs T cells	LCH cells	T cells	RNF130	0.393697	4.04416e-40	7.62162e-36
LCH cells vs T cells	LCH cells	T cells	CFP	0.393557	2.12308e-17	4.00116e-13
LCH cells vs T cells	LCH cells	T cells	RPS27L	0.393482	6.20951e-22	1.17024e-17
LCH cells vs T cells	LCH cells	T cells	QPCT	0.391386	2.23341e-37	4.20908e-33
LCH cells vs T cells	LCH cells	T cells	ANXA1	0.390968	1.31105e-47	2.47081e-43
LCH cells vs T cells	LCH cells	T cells	CLEC7A	0.390409	7.56708e-46	1.42609e-41
LCH cells vs T cells	LCH cells	T cells	ATG3	0.388757	2.06216e-41	3.88635e-37
LCH cells vs T cells	LCH cells	T cells	KYNU	0.387944	1.80312e-39	3.39816e-35
LCH cells vs T cells	LCH cells	T cells	CD59	0.387616	1.14531e-37	2.15845e-33
LCH cells vs T cells	LCH cells	T cells	BASP1	0.386633	9.50245e-39	1.79083e-34
LCH cells vs T cells	LCH cells	T cells	PLD4	0.38583	2.60498e-32	4.90935e-28
LCH cells vs T cells	LCH cells	T cells	GLIPR1	0.384074	8.35802e-36	1.57515e-31
LCH cells vs T cells	LCH cells	T cells	TXN	0.383392	6.98225e-18	1.31588e-13
LCH cells vs T cells	LCH cells	T cells	SNX8	0.38151	2.93251e-49	5.52662e-45
LCH cells vs T cells	LCH cells	T cells	TSPO	0.381119	9.67624e-38	1.82358e-33
LCH cells vs T cells	LCH cells	T cells	SKAP2	0.381076	9.34689e-36	1.76152e-31
LCH cells vs T cells	LCH cells	T cells	LGALS9	0.379163	1.04187e-43	1.96351e-39
LCH cells vs T cells	LCH cells	T cells	PLEKHO1	0.377429	2.24154e-42	4.22441e-38
LCH cells vs T cells	LCH cells	T cells	MARCKS	0.375203	2.22803e-18	4.19895e-14
LCH cells vs T cells	LCH cells	T cells	LPCAT2	0.370883	3.0995e-36	5.84131e-32
LCH cells vs T cells	LCH cells	T cells	FAM109A	0.367892	1.61535e-39	3.04429e-35
LCH cells vs T cells	LCH cells	T cells	PRELID1	0.366599	3.05385e-25	5.75529e-21
LCH cells vs T cells	LCH cells	T cells	AP2S1	0.364278	2.83305e-46	5.33917e-42
LCH cells vs T cells	LCH cells	T cells	RBPJ	0.363844	1.18852e-37	2.23989e-33
LCH cells vs T cells	LCH cells	T cells	RAB31	0.363517	1.40841e-38	2.6543e-34
LCH cells vs T cells	LCH cells	T cells	HHEX	0.35658	4.47297e-36	8.42975e-32
LCH cells vs T cells	LCH cells	T cells	BTK	0.355334	1.0711e-47	2.01859e-43
LCH cells vs T cells	LCH cells	T cells	GAS2L1	0.35238	4.26899e-40	8.04533e-36
LCH cells vs T cells	LCH cells	T cells	SSR1	0.352082	2.0114e-25	3.79069e-21
LCH cells vs T cells	LCH cells	T cells	GAPT	0.351065	1.12693e-33	2.12381e-29
LCH cells vs T cells	LCH cells	T cells	RHOC	0.350007	9.48435e-40	1.78742e-35
LCH cells vs T cells	LCH cells	T cells	SLC8A1	0.347457	1.81771e-29	3.42566e-25
LCH cells vs T cells	LCH cells	T cells	FFAR4	0.345694	5.46832e-45	1.03056e-40
LCH cells vs T cells	LCH cells	T cells	ARF3	0.345155	1.15172e-35	2.17053e-31
LCH cells vs T cells	LCH cells	T cells	LAMTOR2	0.344757	1.43417e-34	2.70284e-30
LCH cells vs T cells	LCH cells	T cells	UPP1	0.342414	1.32833e-20	2.50337e-16
LCH cells vs T cells	LCH cells	T cells	BCAT1	0.341455	1.84057e-35	3.46875e-31
LCH cells vs T cells	LCH cells	T cells	SERPINB6	0.340385	7.94879e-50	1.49803e-45
LCH cells vs T cells	LCH cells	T cells	BAIAP2	0.33821	4.08556e-42	7.69964e-38
LCH cells vs T cells	LCH cells	T cells	BEX4	0.337865	4.72935e-39	8.91293e-35
LCH cells vs T cells	LCH cells	T cells	CORO1C	0.336755	1.4314e-44	2.69761e-40
LCH cells vs T cells	LCH cells	T cells	DAB2	0.336635	1.47577e-31	2.78123e-27
LCH cells vs T cells	LCH cells	T cells	SPINT2	0.331214	6.87573e-36	1.2958e-31
LCH cells vs T cells	LCH cells	T cells	LPAR6	0.330325	5.5283e-29	1.04186e-24
LCH cells vs T cells	LCH cells	T cells	IGKC	0.329733	3.3221e-17	6.26084e-13
LCH cells vs T cells	LCH cells	T cells	PDIA3	0.32928	7.50482e-27	1.41436e-22
LCH cells vs T cells	LCH cells	T cells	WDFY2	0.329245	6.67585e-30	1.25813e-25
LCH cells vs T cells	LCH cells	T cells	GNAI1	0.328571	4.46798e-45	8.42035e-41
LCH cells vs T cells	LCH cells	T cells	TBCA	0.328043	1.2504e-25	2.35651e-21
LCH cells vs T cells	LCH cells	T cells	BLVRB	0.323776	3.97386e-41	7.48913e-37
LCH cells vs T cells	LCH cells	T cells	DPYSL2	0.321872	9.04598e-38	1.70481e-33
LCH cells vs T cells	LCH cells	T cells	CPQ	0.31953	3.78717e-30	7.13731e-26
LCH cells vs T cells	LCH cells	T cells	UCHL3	0.31922	5.39192e-33	1.01616e-28
LCH cells vs T cells	LCH cells	T cells	SLC31A2	0.318822	1.87792e-39	3.53914e-35
LCH cells vs T cells	LCH cells	T cells	PLSCR1	0.315281	3.31838e-34	6.25383e-30
LCH cells vs T cells	LCH cells	T cells	MGST3	0.314971	2.27291e-39	4.28353e-35
LCH cells vs T cells	LCH cells	T cells	RASL10A	0.311887	4.79995e-28	9.04598e-24
LCH cells vs T cells	LCH cells	T cells	RAB13	0.310585	1.23066e-25	2.31931e-21
LCH cells vs T cells	LCH cells	T cells	HSBP1	0.307403	1.26871e-35	2.39101e-31
LCH cells vs T cells	LCH cells	T cells	BID	0.306934	5.14124e-33	9.68918e-29
LCH cells vs T cells	LCH cells	T cells	HLA-DOA	0.306158	1.00398e-33	1.8921e-29
LCH cells vs T cells	LCH cells	T cells	EIF4EBP1	0.304869	1.15207e-34	2.17119e-30
LCH cells vs T cells	LCH cells	T cells	DOK1	0.304246	7.11816e-29	1.34149e-24
LCH cells vs T cells	LCH cells	T cells	SLC39A13	0.304027	4.63337e-31	8.73204e-27
LCH cells vs T cells	LCH cells	T cells	NAGA	0.303384	7.21651e-33	1.36002e-28
LCH cells vs T cells	LCH cells	T cells	FAM129B	0.301558	2.78314e-31	5.24511e-27
LCH cells vs T cells	LCH cells	T cells	SPINT1	0.300092	2.17964e-35	4.10776e-31
LCH cells vs T cells	LCH cells	T cells	RNPEP	0.297731	2.40256e-38	4.52787e-34
LCH cells vs T cells	LCH cells	T cells	LYN	0.296799	2.10769e-36	3.97215e-32
LCH cells vs T cells	LCH cells	T cells	CBR3	0.296704	9.93879e-29	1.87306e-24
LCH cells vs T cells	LCH cells	T cells	FAM49A	0.294942	9.25926e-40	1.745e-35
LCH cells vs T cells	LCH cells	T cells	DOCK5	0.294248	1.15812e-28	2.1826e-24
LCH cells vs T cells	LCH cells	T cells	HSD17B12	0.29422	7.74262e-42	1.45917e-37
LCH cells vs T cells	LCH cells	T cells	RALB	0.294122	7.70945e-42	1.45292e-37
LCH cells vs T cells	LCH cells	T cells	CYSTM1	0.294091	6.41138e-34	1.20829e-29
LCH cells vs T cells	LCH cells	T cells	MYO6	0.292365	1.87159e-38	3.5272e-34
LCH cells vs T cells	LCH cells	T cells	EIF4E2	0.28944	8.29296e-33	1.56289e-28
LCH cells vs T cells	LCH cells	T cells	YWHAE	0.289375	1.29872e-28	2.44756e-24
LCH cells vs T cells	LCH cells	T cells	CD300A	0.288749	3.57136e-33	6.73058e-29
LCH cells vs T cells	LCH cells	T cells	MPEG1	0.285709	5.38409e-30	1.01469e-25
LCH cells vs T cells	LCH cells	T cells	VPS35	0.284454	3.44684e-27	6.49592e-23
LCH cells vs T cells	LCH cells	T cells	ALCAM	0.282741	5.99996e-28	1.13075e-23
LCH cells vs T cells	LCH cells	T cells	PPIP5K2	0.282448	2.00464e-24	3.77794e-20
LCH cells vs T cells	LCH cells	T cells	RGS19	0.281192	1.19905e-31	2.25972e-27
LCH cells vs T cells	LCH cells	T cells	EVI2B	0.281057	3.66629e-33	6.90949e-29
LCH cells vs T cells	LCH cells	T cells	MS4A7	0.278726	5.3627e-21	1.01065e-16
LCH cells vs T cells	LCH cells	T cells	P2RY6	0.278551	2.62952e-28	4.95559e-24
LCH cells vs T cells	LCH cells	T cells	FAM105A	0.269787	2.31463e-27	4.36215e-23
LCH cells vs T cells	LCH cells	T cells	NUDT14	0.268064	1.14923e-29	2.16584e-25
LCH cells vs T cells	LCH cells	T cells	LINC01420	0.266309	8.27989e-35	1.56043e-30
LCH cells vs T cells	LCH cells	T cells	MICAL1	0.263777	6.45706e-30	1.2169e-25
LCH cells vs T cells	LCH cells	T cells	APOBR	0.263564	2.4658e-27	4.64705e-23
LCH cells vs T cells	LCH cells	T cells	CAMTA1	0.262528	1.23564e-24	2.32869e-20
LCH cells vs T cells	LCH cells	T cells	RP11-350J20.12	0.261992	1.25054e-27	2.35677e-23
LCH cells vs T cells	LCH cells	T cells	ARPC3	0.260193	7.11322e-47	1.34056e-42
LCH cells vs T cells	LCH cells	T cells	HIP1	0.259659	1.14408e-25	2.15613e-21
LCH cells vs T cells	T cells	LCH cells	GADD45B	-0.0091685	2.32331e-10	4.37851e-06
LCH cells vs T cells	T cells	LCH cells	IGHA1	-0.0567179	1.19411e-11	2.25042e-07
LCH cells vs T cells	T cells	LCH cells	ARF1	-0.266736	1.13303e-09	2.13531e-05
LCH cells vs T cells	T cells	LCH cells	RBM39	-0.269694	4.92129e-14	9.27466e-10
LCH cells vs T cells	T cells	LCH cells	RPLP0	-0.274564	9.97532e-22	1.87995e-17
LCH cells vs T cells	T cells	LCH cells	MCM3	-0.274737	2.08841e-07	0.00393582
LCH cells vs T cells	T cells	LCH cells	TNIK	-0.280284	2.17031e-99	4.09017e-95
LCH cells vs T cells	T cells	LCH cells	NDUFB4	-0.280393	1.59106e-12	2.9985e-08
LCH cells vs T cells	T cells	LCH cells	SRPK2	-0.281015	3.91685e-08	0.000738169
LCH cells vs T cells	T cells	LCH cells	SYTL1	-0.286939	2.28978e-18	4.31532e-14
LCH cells vs T cells	T cells	LCH cells	ARHGAP25	-0.289299	3.64821e-11	6.87542e-07
LCH cells vs T cells	T cells	LCH cells	VCP	-0.293473	3.9295e-09	7.40553e-05
LCH cells vs T cells	T cells	LCH cells	ATP6V0E2	-0.297053	8.27103e-36	1.55876e-31
LCH cells vs T cells	T cells	LCH cells	ABHD17A	-0.298031	1.54957e-15	2.92033e-11
LCH cells vs T cells	T cells	LCH cells	SATB1	-0.298693	2.19199e-31	4.13102e-27
LCH cells vs T cells	T cells	LCH cells	CASP3	-0.299481	8.68534e-19	1.63684e-14
LCH cells vs T cells	T cells	LCH cells	STAT4	-0.299505	9.21998e-121	1.7376e-116
LCH cells vs T cells	T cells	LCH cells	SF3B2	-0.300644	2.92123e-09	5.50536e-05
LCH cells vs T cells	T cells	LCH cells	ACTN4	-0.303776	4.5706e-08	0.000861375
LCH cells vs T cells	T cells	LCH cells	GRK6	-0.306539	8.20106e-15	1.54557e-10
LCH cells vs T cells	T cells	LCH cells	ITGAL	-0.307048	3.72157e-78	7.01367e-74
LCH cells vs T cells	T cells	LCH cells	TSTD1	-0.307899	7.05657e-10	1.32988e-05
LCH cells vs T cells	T cells	LCH cells	GBP4	-0.308258	6.99801e-25	1.31884e-20
LCH cells vs T cells	T cells	LCH cells	OXNAD1	-0.308363	6.00105e-31	1.13096e-26
LCH cells vs T cells	T cells	LCH cells	HACD1	-0.310135	1.40705e-112	2.65173e-108
LCH cells vs T cells	T cells	LCH cells	SLA2	-0.311648	2.80035e-128	5.27755e-124
LCH cells vs T cells	T cells	LCH cells	NDUFB9	-0.311899	9.5127e-10	1.79276e-05
LCH cells vs T cells	T cells	LCH cells	SP140	-0.312417	4.2443e-17	7.99881e-13
LCH cells vs T cells	T cells	LCH cells	HNRNPR	-0.312802	1.70592e-09	3.21497e-05
LCH cells vs T cells	T cells	LCH cells	ARID5A	-0.313372	3.38332e-09	6.37621e-05
LCH cells vs T cells	T cells	LCH cells	SNRPB	-0.315313	4.29162e-13	8.08799e-09
LCH cells vs T cells	T cells	LCH cells	TMC6	-0.315616	2.61099e-07	0.00492067
LCH cells vs T cells	T cells	LCH cells	CYTH1	-0.319614	6.67225e-14	1.25745e-09
LCH cells vs T cells	T cells	LCH cells	ITGAE	-0.319888	2.14829e-09	4.04867e-05
LCH cells vs T cells	T cells	LCH cells	ODF2L	-0.325135	1.83994e-14	3.46756e-10
LCH cells vs T cells	T cells	LCH cells	RTF1	-0.325786	9.70527e-09	0.000182905
LCH cells vs T cells	T cells	LCH cells	AKTIP	-0.327011	2.34223e-28	4.41416e-24
LCH cells vs T cells	T cells	LCH cells	PRDM1	-0.328962	3.20167e-19	6.03386e-15
LCH cells vs T cells	T cells	LCH cells	PLEKHF1	-0.333667	1.07888e-73	2.03326e-69
LCH cells vs T cells	T cells	LCH cells	ANXA2R	-0.33497	8.22328e-52	1.54976e-47
LCH cells vs T cells	T cells	LCH cells	NDUFA4	-0.336905	1.0947e-23	2.06307e-19
LCH cells vs T cells	T cells	LCH cells	MAP4K1	-0.337367	2.32351e-18	4.37889e-14
LCH cells vs T cells	T cells	LCH cells	WDR1	-0.337572	1.07203e-08	0.000202035
LCH cells vs T cells	T cells	LCH cells	PSMA5	-0.337942	1.20728e-11	2.27525e-07
LCH cells vs T cells	T cells	LCH cells	CSK	-0.339415	6.86888e-13	1.29451e-08
LCH cells vs T cells	T cells	LCH cells	SERPINB9	-0.340508	4.10042e-15	7.72765e-11
LCH cells vs T cells	T cells	LCH cells	RASGRP2	-0.34104	4.32513e-54	8.15115e-50
LCH cells vs T cells	T cells	LCH cells	TC2N	-0.341489	1.96806e-100	3.70901e-96
LCH cells vs T cells	T cells	LCH cells	CAMK4	-0.343013	1.62923e-112	3.07044e-108
LCH cells vs T cells	T cells	LCH cells	CDC25B	-0.343026	1.64041e-48	3.09152e-44
LCH cells vs T cells	T cells	LCH cells	HSPA8	-0.345186	7.62638e-27	1.43727e-22
LCH cells vs T cells	T cells	LCH cells	MPG	-0.346101	1.11823e-15	2.10742e-11
LCH cells vs T cells	T cells	LCH cells	RNPS1	-0.346172	2.25455e-10	4.24893e-06
LCH cells vs T cells	T cells	LCH cells	MT1X	-0.346639	2.34283e-08	0.00044153
LCH cells vs T cells	T cells	LCH cells	ATPIF1	-0.346817	1.33438e-19	2.51478e-15
LCH cells vs T cells	T cells	LCH cells	FNBP1	-0.346967	2.81361e-09	5.30253e-05
LCH cells vs T cells	T cells	LCH cells	SDHA	-0.347552	3.19752e-08	0.000602605
LCH cells vs T cells	T cells	LCH cells	YPEL3	-0.350912	1.23637e-19	2.33006e-15
LCH cells vs T cells	T cells	LCH cells	MIEN1	-0.352136	7.94596e-16	1.4975e-11
LCH cells vs T cells	T cells	LCH cells	SSR2	-0.35265	6.14912e-24	1.15886e-19
LCH cells vs T cells	T cells	LCH cells	PPP1R18	-0.354103	5.35804e-08	0.00100978
LCH cells vs T cells	T cells	LCH cells	MAF	-0.355676	5.22162e-83	9.84067e-79
LCH cells vs T cells	T cells	LCH cells	SELPLG	-0.357875	3.06065e-20	5.76809e-16
LCH cells vs T cells	T cells	LCH cells	GSTK1	-0.3579	1.29194e-10	2.4348e-06
LCH cells vs T cells	T cells	LCH cells	ZNRD1	-0.359425	5.23035e-14	9.85711e-10
LCH cells vs T cells	T cells	LCH cells	PSMB8-AS1	-0.359505	7.80594e-11	1.47111e-06
LCH cells vs T cells	T cells	LCH cells	STK4	-0.3598	7.90092e-12	1.48901e-07
LCH cells vs T cells	T cells	LCH cells	MT1F	-0.360231	6.26584e-21	1.18086e-16
LCH cells vs T cells	T cells	LCH cells	AIP	-0.361728	2.31252e-15	4.35818e-11
LCH cells vs T cells	T cells	LCH cells	ANP32B	-0.362712	1.27184e-17	2.39692e-13
LCH cells vs T cells	T cells	LCH cells	RASAL3	-0.364208	8.48258e-15	1.59863e-10
LCH cells vs T cells	T cells	LCH cells	PIM1	-0.36464	2.57228e-10	4.84773e-06
LCH cells vs T cells	T cells	LCH cells	IKZF1	-0.364671	5.72307e-22	1.07857e-17
LCH cells vs T cells	T cells	LCH cells	TSPAN5	-0.364708	2.50174e-127	4.71479e-123
LCH cells vs T cells	T cells	LCH cells	MATK	-0.365021	5.6218e-46	1.05948e-41
LCH cells vs T cells	T cells	LCH cells	TYMS	-0.365094	1.92437e-09	3.62667e-05
LCH cells vs T cells	T cells	LCH cells	CD52	-0.365314	5.13704e-11	9.68126e-07
LCH cells vs T cells	T cells	LCH cells	39326	-0.368019	8.05109e-22	1.51731e-17
LCH cells vs T cells	T cells	LCH cells	AC092580.4	-0.370208	9.13768e-105	1.72209e-100
LCH cells vs T cells	T cells	LCH cells	CYFIP2	-0.371241	2.9684e-45	5.59425e-41
LCH cells vs T cells	T cells	LCH cells	NT5C3A	-0.37181	1.97332e-11	3.71891e-07
LCH cells vs T cells	T cells	LCH cells	OAS1	-0.372402	6.36724e-11	1.19997e-06
LCH cells vs T cells	T cells	LCH cells	RABAC1	-0.375092	1.93294e-10	3.64282e-06
LCH cells vs T cells	T cells	LCH cells	ARHGAP15	-0.376054	4.40488e-11	8.30144e-07
LCH cells vs T cells	T cells	LCH cells	CTSD	-0.377787	8.47993e-13	1.59813e-08
LCH cells vs T cells	T cells	LCH cells	PCSK7	-0.377899	1.07681e-15	2.02936e-11
LCH cells vs T cells	T cells	LCH cells	UBE2D2	-0.378283	1.31769e-13	2.48331e-09
LCH cells vs T cells	T cells	LCH cells	CCDC88C	-0.379002	6.6991e-102	1.26251e-97
LCH cells vs T cells	T cells	LCH cells	CENPM	-0.380281	1.23554e-34	2.3285e-30
LCH cells vs T cells	T cells	LCH cells	C9orf16	-0.383892	3.89582e-20	7.34207e-16
LCH cells vs T cells	T cells	LCH cells	RAD21	-0.384914	8.29003e-11	1.56234e-06
LCH cells vs T cells	T cells	LCH cells	AAK1	-0.385138	1.40849e-34	2.65444e-30
LCH cells vs T cells	T cells	LCH cells	TMEM173	-0.386862	7.74844e-08	0.00146027
LCH cells vs T cells	T cells	LCH cells	SAMD3	-0.387767	3.16977e-135	5.97375e-131
LCH cells vs T cells	T cells	LCH cells	FXYD5	-0.387994	2.66103e-08	0.000501498
LCH cells vs T cells	T cells	LCH cells	C5orf56	-0.389652	1.5023e-56	2.83123e-52
LCH cells vs T cells	T cells	LCH cells	GUK1	-0.392002	1.11923e-29	2.1093e-25
LCH cells vs T cells	T cells	LCH cells	FAM107B	-0.394535	2.97054e-19	5.59828e-15
LCH cells vs T cells	T cells	LCH cells	RASGRP1	-0.394971	3.77944e-140	7.12272e-136
LCH cells vs T cells	T cells	LCH cells	SOCS1	-0.395955	2.51021e-17	4.73074e-13
LCH cells vs T cells	T cells	LCH cells	SLAMF1	-0.396022	8.51921e-109	1.60553e-104
LCH cells vs T cells	T cells	LCH cells	UBB	-0.396268	3.35761e-33	6.32775e-29
LCH cells vs T cells	T cells	LCH cells	TPR	-0.396636	1.99189e-10	3.75392e-06
LCH cells vs T cells	T cells	LCH cells	RNASEH2B	-0.396866	6.29839e-14	1.187e-09
LCH cells vs T cells	T cells	LCH cells	HMGN2	-0.398698	9.06861e-10	1.70907e-05
LCH cells vs T cells	T cells	LCH cells	C9orf78	-0.401532	1.07467e-16	2.02532e-12
LCH cells vs T cells	T cells	LCH cells	LBR	-0.403741	1.78905e-19	3.37165e-15
LCH cells vs T cells	T cells	LCH cells	CUTA	-0.403942	1.09717e-23	2.06772e-19
LCH cells vs T cells	T cells	LCH cells	STAT1	-0.406094	3.097e-09	5.83661e-05
LCH cells vs T cells	T cells	LCH cells	ADD3	-0.408913	1.80191e-38	3.39587e-34
LCH cells vs T cells	T cells	LCH cells	IL16	-0.409618	3.10579e-10	5.85318e-06
LCH cells vs T cells	T cells	LCH cells	LINC00861	-0.409656	3.64717e-114	6.87346e-110
LCH cells vs T cells	T cells	LCH cells	UXS1	-0.410937	8.95422e-16	1.68751e-11
LCH cells vs T cells	T cells	LCH cells	CD320	-0.410965	9.43884e-41	1.77884e-36
LCH cells vs T cells	T cells	LCH cells	RAB33A	-0.411467	1.61471e-27	3.04309e-23
LCH cells vs T cells	T cells	LCH cells	MAGEH1	-0.413046	1.75492e-26	3.30732e-22
LCH cells vs T cells	T cells	LCH cells	ITGB1	-0.413373	1.68654e-07	0.00317846
LCH cells vs T cells	T cells	LCH cells	CLIC3	-0.413409	1.34124e-69	2.52771e-65
LCH cells vs T cells	T cells	LCH cells	AC017002.1	-0.413784	9.57794e-126	1.80506e-121
LCH cells vs T cells	T cells	LCH cells	ACAA2	-0.415357	1.49447e-29	2.81648e-25
LCH cells vs T cells	T cells	LCH cells	CARHSP1	-0.415833	1.76267e-12	3.32193e-08
LCH cells vs T cells	T cells	LCH cells	STAT3	-0.416857	1.09372e-09	2.06122e-05
LCH cells vs T cells	T cells	LCH cells	CDC42SE2	-0.418893	1.88586e-16	3.55409e-12
LCH cells vs T cells	T cells	LCH cells	CDKN1B	-0.418985	2.95273e-30	5.56471e-26
LCH cells vs T cells	T cells	LCH cells	GRAP2	-0.419917	8.37637e-166	1.57861e-161
LCH cells vs T cells	T cells	LCH cells	SARAF	-0.420034	3.4886e-14	6.57461e-10
LCH cells vs T cells	T cells	LCH cells	SH3KBP1	-0.420592	1.90625e-11	3.59251e-07
LCH cells vs T cells	T cells	LCH cells	RRM2	-0.421441	1.09621e-19	2.06591e-15
LCH cells vs T cells	T cells	LCH cells	IL7R	-0.422076	3.98911e-10	7.51788e-06
LCH cells vs T cells	T cells	LCH cells	SRGN	-0.423631	1.16024e-15	2.18658e-11
LCH cells vs T cells	T cells	LCH cells	IL12RB1	-0.423994	1.38065e-66	2.60197e-62
LCH cells vs T cells	T cells	LCH cells	UBE2L6	-0.4242	3.33125e-17	6.27807e-13
LCH cells vs T cells	T cells	LCH cells	PPP1CA	-0.424432	3.12121e-23	5.88223e-19
LCH cells vs T cells	T cells	LCH cells	PCED1B	-0.426048	1.2306e-107	2.3192e-103
LCH cells vs T cells	T cells	LCH cells	NCOR1	-0.426808	4.50519e-16	8.49048e-12
LCH cells vs T cells	T cells	LCH cells	LAYN	-0.427549	4.60212e-128	8.67316e-124
LCH cells vs T cells	T cells	LCH cells	SP100	-0.431667	1.92465e-15	3.6272e-11
LCH cells vs T cells	T cells	LCH cells	SMCHD1	-0.433675	1.13991e-23	2.14827e-19
LCH cells vs T cells	T cells	LCH cells	EPSTI1	-0.435315	2.01616e-15	3.79965e-11
LCH cells vs T cells	T cells	LCH cells	IQGAP2	-0.435377	5.6102e-83	1.0573e-78
LCH cells vs T cells	T cells	LCH cells	PPM1K	-0.435753	2.01091e-40	3.78975e-36
LCH cells vs T cells	T cells	LCH cells	TSC22D4	-0.436621	1.65677e-18	3.12234e-14
LCH cells vs T cells	T cells	LCH cells	BCL11B	-0.43676	2.69324e-160	5.07567e-156
LCH cells vs T cells	T cells	LCH cells	AQP3	-0.4399	8.26488e-133	1.5576e-128
LCH cells vs T cells	T cells	LCH cells	PARP1	-0.440228	1.4103e-11	2.65785e-07
LCH cells vs T cells	T cells	LCH cells	SASH3	-0.440816	2.3034e-49	4.34099e-45
LCH cells vs T cells	T cells	LCH cells	RNF19A	-0.441471	4.24674e-09	8.0034e-05
LCH cells vs T cells	T cells	LCH cells	PIK3R1	-0.444418	5.81353e-14	1.09562e-09
LCH cells vs T cells	T cells	LCH cells	IFI16	-0.444797	9.6759e-24	1.82352e-19
LCH cells vs T cells	T cells	LCH cells	HDAC1	-0.4465	3.7702e-19	7.10533e-15
LCH cells vs T cells	T cells	LCH cells	IFITM2	-0.448251	1.30466e-20	2.45876e-16
LCH cells vs T cells	T cells	LCH cells	EZR	-0.448299	1.84745e-15	3.48171e-11
LCH cells vs T cells	T cells	LCH cells	KIAA0101	-0.449581	1.9754e-12	3.72284e-08
LCH cells vs T cells	T cells	LCH cells	SIGIRR	-0.450968	3.6846e-39	6.944e-35
LCH cells vs T cells	T cells	LCH cells	RGL4	-0.451502	7.51156e-185	1.41563e-180
LCH cells vs T cells	T cells	LCH cells	WHSC1L1	-0.454367	2.92981e-22	5.52151e-18
LCH cells vs T cells	T cells	LCH cells	LYAR	-0.459807	3.17614e-12	5.98575e-08
LCH cells vs T cells	T cells	LCH cells	PSMB8	-0.463923	2.6746e-29	5.04054e-25
LCH cells vs T cells	T cells	LCH cells	FAM46C	-0.466747	2.01053e-179	3.78904e-175
LCH cells vs T cells	T cells	LCH cells	LEF1	-0.467128	3.40835e-87	6.42337e-83
LCH cells vs T cells	T cells	LCH cells	CALM3	-0.467261	8.38918e-31	1.58102e-26
LCH cells vs T cells	T cells	LCH cells	PMAIP1	-0.467606	1.22257e-16	2.30406e-12
LCH cells vs T cells	T cells	LCH cells	FCMR	-0.468082	1.59595e-124	3.00773e-120
LCH cells vs T cells	T cells	LCH cells	PAIP2	-0.468759	5.77928e-10	1.08916e-05
LCH cells vs T cells	T cells	LCH cells	MZT2B	-0.470703	7.46007e-30	1.40592e-25
LCH cells vs T cells	T cells	LCH cells	FOXP3	-0.471406	3.93478e-159	7.41549e-155
LCH cells vs T cells	T cells	LCH cells	YWHAZ	-0.471625	1.03954e-17	1.95912e-13
LCH cells vs T cells	T cells	LCH cells	RTKN2	-0.471777	9.96906e-120	1.87877e-115
LCH cells vs T cells	T cells	LCH cells	EML4	-0.472718	4.69228e-23	8.84307e-19
LCH cells vs T cells	T cells	LCH cells	IKZF3	-0.473059	9.27033e-166	1.74709e-161
LCH cells vs T cells	T cells	LCH cells	CD48	-0.473736	5.00769e-29	9.4375e-25
LCH cells vs T cells	T cells	LCH cells	OASL	-0.474475	1.76725e-42	3.33056e-38
LCH cells vs T cells	T cells	LCH cells	PPP2R5C	-0.475383	4.4085e-20	8.30827e-16
LCH cells vs T cells	T cells	LCH cells	TRAT1	-0.476176	1.26018e-189	2.37493e-185
LCH cells vs T cells	T cells	LCH cells	PPP1CC	-0.480301	6.30759e-29	1.18873e-24
LCH cells vs T cells	T cells	LCH cells	NAP1L4	-0.485176	3.42519e-28	6.45511e-24
LCH cells vs T cells	T cells	LCH cells	EMB	-0.486029	6.28628e-59	1.18471e-54
LCH cells vs T cells	T cells	LCH cells	MYO1G	-0.487162	3.33994e-30	6.29445e-26
LCH cells vs T cells	T cells	LCH cells	RCSD1	-0.487465	1.42883e-50	2.69278e-46
LCH cells vs T cells	T cells	LCH cells	ELF1	-0.489448	4.20917e-12	7.93261e-08
LCH cells vs T cells	T cells	LCH cells	BTN3A2	-0.49036	4.09989e-49	7.72665e-45
LCH cells vs T cells	T cells	LCH cells	PRKCH	-0.491364	2.49781e-23	4.70737e-19
LCH cells vs T cells	T cells	LCH cells	GPR171	-0.491418	1.53483e-41	2.89254e-37
LCH cells vs T cells	T cells	LCH cells	ARPC5L	-0.493081	6.91016e-22	1.30229e-17
LCH cells vs T cells	T cells	LCH cells	GIMAP1	-0.494436	4.41978e-56	8.32952e-52
LCH cells vs T cells	T cells	LCH cells	TERF2IP	-0.497484	6.82734e-23	1.28668e-18
LCH cells vs T cells	T cells	LCH cells	BIN2	-0.498285	8.64406e-15	1.62906e-10
LCH cells vs T cells	T cells	LCH cells	SKAP1	-0.498866	4.10187e-13	7.73039e-09
LCH cells vs T cells	T cells	LCH cells	CD79B	-0.499798	7.41287e-151	1.39703e-146
LCH cells vs T cells	T cells	LCH cells	TSC22D3	-0.500872	5.74147e-08	0.00108204
LCH cells vs T cells	T cells	LCH cells	PSME1	-0.501125	4.25779e-52	8.02424e-48
LCH cells vs T cells	T cells	LCH cells	TNFRSF25	-0.502797	2.11785e-229	3.9913e-225
LCH cells vs T cells	T cells	LCH cells	TNIP1	-0.504915	6.18751e-14	1.1661e-09
LCH cells vs T cells	T cells	LCH cells	PDCD4	-0.505076	9.97362e-22	1.87963e-17
LCH cells vs T cells	T cells	LCH cells	CD28	-0.50662	3.1486e-244	5.93385e-240
LCH cells vs T cells	T cells	LCH cells	CD38	-0.510003	1.1985e-119	2.25869e-115
LCH cells vs T cells	T cells	LCH cells	BUB3	-0.51209	1.3701e-25	2.58209e-21
LCH cells vs T cells	T cells	LCH cells	ARHGEF1	-0.520352	6.93612e-35	1.30718e-30
LCH cells vs T cells	T cells	LCH cells	GBP5	-0.521477	7.08276e-181	1.33482e-176
LCH cells vs T cells	T cells	LCH cells	RNF213	-0.521827	1.89281e-34	3.56719e-30
LCH cells vs T cells	T cells	LCH cells	ICAM2	-0.522519	2.86457e-88	5.39858e-84
LCH cells vs T cells	T cells	LCH cells	SLFN5	-0.525969	4.30027e-24	8.1043e-20
LCH cells vs T cells	T cells	LCH cells	LYST	-0.526958	7.66141e-16	1.44387e-11
LCH cells vs T cells	T cells	LCH cells	NOSIP	-0.532179	4.32994e-20	8.1602e-16
LCH cells vs T cells	T cells	LCH cells	DNPH1	-0.535616	4.59854e-22	8.66641e-18
LCH cells vs T cells	T cells	LCH cells	SYTL3	-0.537989	1.53667e-51	2.89602e-47
LCH cells vs T cells	T cells	LCH cells	CCND2	-0.539188	6.34691e-21	1.19614e-16
LCH cells vs T cells	T cells	LCH cells	VAMP2	-0.543294	1.33219e-36	2.51064e-32
LCH cells vs T cells	T cells	LCH cells	LY6E	-0.545324	5.63251e-47	1.0615e-42
LCH cells vs T cells	T cells	LCH cells	LDHB	-0.546637	9.53912e-52	1.79774e-47
LCH cells vs T cells	T cells	LCH cells	RHBDD2	-0.547436	2.07361e-07	0.00390792
LCH cells vs T cells	T cells	LCH cells	ARHGDIB	-0.549959	2.35239e-87	4.43332e-83
LCH cells vs T cells	T cells	LCH cells	CD99	-0.551864	1.87041e-40	3.52498e-36
LCH cells vs T cells	T cells	LCH cells	ACAP1	-0.567334	6.68111e-27	1.25912e-22
LCH cells vs T cells	T cells	LCH cells	APOBEC3C	-0.570918	1.40369e-18	2.64539e-14
LCH cells vs T cells	T cells	LCH cells	ACTG1	-0.571841	9.3605e-91	1.76408e-86
LCH cells vs T cells	T cells	LCH cells	CD5	-0.572776	1.26054e-242	2.37562e-238
LCH cells vs T cells	T cells	LCH cells	CYTIP	-0.57307	2.35614e-19	4.44039e-15
LCH cells vs T cells	T cells	LCH cells	ANAPC16	-0.575134	1.41997e-45	2.67608e-41
LCH cells vs T cells	T cells	LCH cells	CD8A	-0.576037	8.71178e-166	1.64182e-161
LCH cells vs T cells	T cells	LCH cells	IL27RA	-0.579159	4.61213e-96	8.69201e-92
LCH cells vs T cells	T cells	LCH cells	BIRC3	-0.580036	1.44032e-24	2.71442e-20
LCH cells vs T cells	T cells	LCH cells	CCDC167	-0.58158	1.52673e-36	2.87727e-32
LCH cells vs T cells	T cells	LCH cells	IRF1	-0.582243	1.58327e-40	2.98383e-36
LCH cells vs T cells	T cells	LCH cells	PSMB9	-0.595439	9.36075e-66	1.76413e-61
LCH cells vs T cells	T cells	LCH cells	HLA-F	-0.596747	5.91985e-50	1.11566e-45
LCH cells vs T cells	T cells	LCH cells	BTG1	-0.599547	8.54804e-30	1.61096e-25
LCH cells vs T cells	T cells	LCH cells	CD82	-0.606292	2.78104e-40	5.24115e-36
LCH cells vs T cells	T cells	LCH cells	PIK3IP1	-0.60788	6.36313e-89	1.19919e-84
LCH cells vs T cells	T cells	LCH cells	ISG15	-0.607955	1.66327e-42	3.13461e-38
LCH cells vs T cells	T cells	LCH cells	PTPN7	-0.60936	4.24189e-29	7.99426e-25
LCH cells vs T cells	T cells	LCH cells	CD6	-0.61178	6.19437e-243	1.16739e-238
LCH cells vs T cells	T cells	LCH cells	OCIAD2	-0.611811	8.80912e-52	1.66017e-47
LCH cells vs T cells	T cells	LCH cells	DENND2D	-0.615274	6.14147e-93	1.15742e-88
LCH cells vs T cells	T cells	LCH cells	40057	-0.615485	1.18324e-49	2.22993e-45
LCH cells vs T cells	T cells	LCH cells	OPTN	-0.617782	2.18186e-241	4.11194e-237
LCH cells vs T cells	T cells	LCH cells	ITM2C	-0.618728	3.65988e-110	6.89742e-106
LCH cells vs T cells	T cells	LCH cells	WIPF1	-0.620734	1.53131e-30	2.88591e-26
LCH cells vs T cells	T cells	LCH cells	PYHIN1	-0.622731	1.92068e-269	3.61971e-265
LCH cells vs T cells	T cells	LCH cells	CCR7	-0.624436	5.88838e-43	1.10972e-38
LCH cells vs T cells	T cells	LCH cells	MIR4435-2HG	-0.637098	2.24485e-22	4.23065e-18
LCH cells vs T cells	T cells	LCH cells	TAP1	-0.637313	5.1767e-46	9.75601e-42
LCH cells vs T cells	T cells	LCH cells	IL2RG	-0.640422	4.07663e-46	7.68281e-42
LCH cells vs T cells	T cells	LCH cells	SOX4	-0.640619	1.2585e-36	2.37178e-32
LCH cells vs T cells	T cells	LCH cells	SYNE2	-0.641169	5.38355e-187	1.01458e-182
LCH cells vs T cells	T cells	LCH cells	GMFG	-0.651826	1.56427e-83	2.94803e-79
LCH cells vs T cells	T cells	LCH cells	SOD1	-0.652206	8.31207e-43	1.56649e-38
LCH cells vs T cells	T cells	LCH cells	PTPRC	-0.655117	2.00473e-66	3.77812e-62
LCH cells vs T cells	T cells	LCH cells	HIST1H4C	-0.658682	1.16545e-08	0.000219641
LCH cells vs T cells	T cells	LCH cells	CHST12	-0.660456	5.44017e-103	1.02525e-98
LCH cells vs T cells	T cells	LCH cells	CST7	-0.660895	2.03906e-17	3.84282e-13
LCH cells vs T cells	T cells	LCH cells	SLC9A3R1	-0.66341	2.37503e-114	4.47598e-110
LCH cells vs T cells	T cells	LCH cells	38961	-0.666799	1.05901e-59	1.99582e-55
LCH cells vs T cells	T cells	LCH cells	CHI3L2	-0.66924	1.69999e-95	3.2038e-91
LCH cells vs T cells	T cells	LCH cells	ID3	-0.678941	4.09122e-52	7.7103e-48
LCH cells vs T cells	T cells	LCH cells	IL2RB	-0.684387	2.04263e-220	3.84954e-216
LCH cells vs T cells	T cells	LCH cells	ADA	-0.694215	1.39354e-138	2.62626e-134
LCH cells vs T cells	T cells	LCH cells	HMGB2	-0.695136	8.93201e-12	1.68333e-07
LCH cells vs T cells	T cells	LCH cells	SIRPG	-0.69698	1.85848e-283	3.50249e-279
LCH cells vs T cells	T cells	LCH cells	ETS1	-0.697736	1.071e-241	2.01841e-237
LCH cells vs T cells	T cells	LCH cells	ZAP70	-0.69871	1.63737e-245	3.08578e-241
LCH cells vs T cells	T cells	LCH cells	CD8B	-0.701352	2.51543e-153	4.74058e-149
LCH cells vs T cells	T cells	LCH cells	CORO1A	-0.701989	1.0135e-88	1.91004e-84
LCH cells vs T cells	T cells	LCH cells	CD96	-0.704605	0	0
LCH cells vs T cells	T cells	LCH cells	AES	-0.705994	1.30309e-43	2.4558e-39
LCH cells vs T cells	T cells	LCH cells	LEPROTL1	-0.714407	6.485e-20	1.22216e-15
LCH cells vs T cells	T cells	LCH cells	RORA	-0.731403	0	0
LCH cells vs T cells	T cells	LCH cells	CD69	-0.734612	3.36395e-36	6.33971e-32
LCH cells vs T cells	T cells	LCH cells	STK17A	-0.761857	2.24346e-62	4.22803e-58
LCH cells vs T cells	T cells	LCH cells	BIN1	-0.764564	7.21747e-111	1.36021e-106
LCH cells vs T cells	T cells	LCH cells	JAK1	-0.764803	7.18926e-68	1.35489e-63
LCH cells vs T cells	T cells	LCH cells	B2M	-0.766	4.79602e-148	9.03858e-144
LCH cells vs T cells	T cells	LCH cells	FYN	-0.769963	7.32083e-206	1.37968e-201
LCH cells vs T cells	T cells	LCH cells	VAMP5	-0.770875	3.99616e-122	7.53117e-118
LCH cells vs T cells	T cells	LCH cells	PBXIP1	-0.779496	2.12906e-123	4.01242e-119
LCH cells vs T cells	T cells	LCH cells	SH2D1A	-0.806026	0	0
LCH cells vs T cells	T cells	LCH cells	RARRES3	-0.825798	5.08695e-58	9.58687e-54
LCH cells vs T cells	T cells	LCH cells	KLRD1	-0.825892	6.68991e-154	1.26078e-149
LCH cells vs T cells	T cells	LCH cells	RAC2	-0.829517	4.69192e-77	8.84238e-73
LCH cells vs T cells	T cells	LCH cells	GZMM	-0.845937	0	0
LCH cells vs T cells	T cells	LCH cells	S1PR4	-0.847502	0	0
LCH cells vs T cells	T cells	LCH cells	FYB	-0.850819	1.61797e-82	3.04922e-78
LCH cells vs T cells	T cells	LCH cells	ARID5B	-0.853435	5.29863e-160	9.9858e-156
LCH cells vs T cells	T cells	LCH cells	PIM2	-0.858581	2.47923e-62	4.67235e-58
LCH cells vs T cells	T cells	LCH cells	LBH	-0.862948	2.49741e-211	4.70663e-207
LCH cells vs T cells	T cells	LCH cells	TUBA4A	-0.864884	1.29559e-249	2.44167e-245
LCH cells vs T cells	T cells	LCH cells	CXCR3	-0.874075	1.38513e-127	2.61041e-123
LCH cells vs T cells	T cells	LCH cells	RHOH	-0.888135	1.19863e-136	2.25894e-132
LCH cells vs T cells	T cells	LCH cells	AC133644.2	-0.901827	7.33134e-189	1.38166e-184
LCH cells vs T cells	T cells	LCH cells	TNFRSF1B	-0.926508	4.13346e-98	7.78992e-94
LCH cells vs T cells	T cells	LCH cells	HLA-C	-0.933886	3.3415e-160	6.29739e-156
LCH cells vs T cells	T cells	LCH cells	APOBEC3G	-0.934674	1.18281e-74	2.22912e-70
LCH cells vs T cells	T cells	LCH cells	ANXA6	-0.937851	1.36967e-88	2.58129e-84
LCH cells vs T cells	T cells	LCH cells	SH2D2A	-0.946303	0	0
LCH cells vs T cells	T cells	LCH cells	TBC1D10C	-0.949522	3.58475e-178	6.75581e-174
LCH cells vs T cells	T cells	LCH cells	GATA3	-0.964314	0	0
LCH cells vs T cells	T cells	LCH cells	CD247	-0.975868	0	0
LCH cells vs T cells	T cells	LCH cells	HCST	-0.984994	6.74676e-72	1.27149e-67
LCH cells vs T cells	T cells	LCH cells	KLRB1	-1.01465	2.82019e-110	5.31494e-106
LCH cells vs T cells	T cells	LCH cells	ZFP36L2	-1.02353	1.20867e-88	2.27786e-84
LCH cells vs T cells	T cells	LCH cells	EVL	-1.02955	6.96151e-109	1.31197e-104
LCH cells vs T cells	T cells	LCH cells	SIT1	-1.02983	0	0
LCH cells vs T cells	T cells	LCH cells	LAIR2	-1.03738	6.29035e-203	1.18548e-198
LCH cells vs T cells	T cells	LCH cells	GZMH	-1.03879	1.23469e-207	2.3269e-203
LCH cells vs T cells	T cells	LCH cells	CXCR6	-1.0531	0	0
LCH cells vs T cells	T cells	LCH cells	BATF	-1.05408	9.63096e-54	1.81505e-49
LCH cells vs T cells	T cells	LCH cells	MT2A	-1.06301	4.58916e-70	8.64873e-66
LCH cells vs T cells	T cells	LCH cells	PRDX2	-1.06887	1.21654e-186	2.29269e-182
LCH cells vs T cells	T cells	LCH cells	HLA-B	-1.07188	2.78197e-169	5.24291e-165
LCH cells vs T cells	T cells	LCH cells	LTB	-1.0769	2.27009e-53	4.27821e-49
LCH cells vs T cells	T cells	LCH cells	37135	-1.08491	1.12036e-207	2.11143e-203
LCH cells vs T cells	T cells	LCH cells	CREM	-1.09759	2.46753e-56	4.6503e-52
LCH cells vs T cells	T cells	LCH cells	LAG3	-1.12194	2.3374e-154	4.40507e-150
LCH cells vs T cells	T cells	LCH cells	TRAF3IP3	-1.12929	0	0
LCH cells vs T cells	T cells	LCH cells	SPOCK2	-1.13375	0	0
LCH cells vs T cells	T cells	LCH cells	GBP2	-1.13604	2.15264e-129	4.05687e-125
LCH cells vs T cells	T cells	LCH cells	HLA-E	-1.14492	4.27701e-166	8.06046e-162
LCH cells vs T cells	T cells	LCH cells	ICOS	-1.14851	0	0
LCH cells vs T cells	T cells	LCH cells	TIGIT	-1.15198	0	0
LCH cells vs T cells	T cells	LCH cells	CLEC2D	-1.15582	2.2521e-109	4.24431e-105
LCH cells vs T cells	T cells	LCH cells	GIMAP4	-1.16438	6.70027e-168	1.26273e-163
LCH cells vs T cells	T cells	LCH cells	CCL4	-1.17268	1.27356e-33	2.40016e-29
LCH cells vs T cells	T cells	LCH cells	CTLA4	-1.18803	0	0
LCH cells vs T cells	T cells	LCH cells	PRF1	-1.19067	0	0
LCH cells vs T cells	T cells	LCH cells	GYPC	-1.21119	0	0
LCH cells vs T cells	T cells	LCH cells	IL2RA	-1.21906	1.0954e-188	2.0644e-184
LCH cells vs T cells	T cells	LCH cells	LIMD2	-1.22207	2.76393e-182	5.2089e-178
LCH cells vs T cells	T cells	LCH cells	LAT	-1.24633	0	0
LCH cells vs T cells	T cells	LCH cells	CD3G	-1.25074	0	0
LCH cells vs T cells	T cells	LCH cells	ITM2A	-1.33461	0	0
LCH cells vs T cells	T cells	LCH cells	HLA-A	-1.34208	2.03326e-182	3.83188e-178
LCH cells vs T cells	T cells	LCH cells	DDIT4	-1.34592	4.18299e-278	7.88326e-274
LCH cells vs T cells	T cells	LCH cells	GIMAP7	-1.35515	0	0
LCH cells vs T cells	T cells	LCH cells	CXCR4	-1.43503	4.39889e-235	8.29015e-231
LCH cells vs T cells	T cells	LCH cells	TNFRSF18	-1.43595	1.58616e-60	2.98928e-56
LCH cells vs T cells	T cells	LCH cells	SELL	-1.46844	0	0
LCH cells vs T cells	T cells	LCH cells	CD3E	-1.59181	0	0
LCH cells vs T cells	T cells	LCH cells	ISG20	-1.61649	0	0
LCH cells vs T cells	T cells	LCH cells	CD2	-1.61948	1.31805e-193	2.484e-189
LCH cells vs T cells	T cells	LCH cells	CD27	-1.72762	0	0
LCH cells vs T cells	T cells	LCH cells	GZMK	-1.77058	0	0
LCH cells vs T cells	T cells	LCH cells	LCK	-1.78684	0	0
LCH cells vs T cells	T cells	LCH cells	GZMB	-1.8601	9.47956e-64	1.78652e-59
LCH cells vs T cells	T cells	LCH cells	CD7	-2.05982	0	0
LCH cells vs T cells	T cells	LCH cells	TNFRSF4	-2.08811	1.85243e-64	3.49109e-60
LCH cells vs T cells	T cells	LCH cells	NKG7	-2.1061	6.9195e-238	1.30405e-233
LCH cells vs T cells	T cells	LCH cells	TRBC1	-2.12326	0	0
LCH cells vs T cells	T cells	LCH cells	TRBC2	-2.22276	0	0
LCH cells vs T cells	T cells	LCH cells	GNLY	-2.22775	7.59234e-118	1.43085e-113
LCH cells vs T cells	T cells	LCH cells	GZMA	-2.23779	9.5953e-262	1.80833e-257
LCH cells vs T cells	T cells	LCH cells	CD3D	-2.43491	0	0
LCH cells vs T cells	T cells	LCH cells	CCL5	-2.49402	4.02905e-234	7.59314e-230
LCH cells vs T cells	T cells	LCH cells	TRAC	-2.87205	0	0
LCH cells vs T cells	T cells	LCH cells	IL32	-3.40225	0	0

## Sheet: LCH gene signature (Fig. 2)
Supplementary Table 2.b
LCH gene signature (overlap of marker lists in Supplementary Table 2.a)
gene	Average logFC	FDR-adjusted P-value
C15orf48	1.73476	0.00207809
TACSTD2	1.63757	1.43351e-62
CD1A	1.56013	1.81286e-70
HLA-DQB2	1.5162	1.20591e-52
PPM1N	1.38825	1.95565e-55
S100B	1.37379	4.04718e-27
FCER1A	1.37299	0.00380077
TIMP1	1.32504	0.00115004
CD207	1.30739	0.00250631
FCGBP	1.28644	9.41764e-56
HPGDS	1.24609	1.81792e-49
HLA-DQA2	1.22956	8.51286e-13
CD1C	1.20708	1.31989e-38
PLEK2	1.20287	1.14994e-51
MMP9	1.17542	1.61703e-29
LMNA	1.16001	9.64196e-06
CD1E	1.15521	0.00347185
NDRG2	1.14239	9.16835e-57
CA2	1.13177	2.13543e-43
CKLF	1.09648	7.51131e-74
S100A4	1.08957	5.70465e-05
RGS16	1.07209	1.44186e-13
GSN	1.03951	1.37828e-48
LGALS1	1.03275	0.00100277
PKIB	1.03144	1.82835e-55
HLA-DPA1	0.993884	5.75936e-48
HLA-DQA1	0.982214	9.06676e-41
SPINK2	0.972967	4.81608e-05
HLA-DPB1	0.96704	1.48093e-40
TNF	0.927136	2.3083e-36
IL22RA2	0.917203	1.35979e-09
S100A11	0.89306	0.000411678
HLA-DQB1	0.886846	2.14577e-33
CTNNBIP1	0.881015	2.15964e-36
PRDX1	0.878508	0.00335924
YWHAH	0.835628	3.55312e-23
VIM	0.831079	0.00321691
RP11-404O13.5	0.818219	2.88666e-16
DBI	0.80887	8.46319e-35
VASP	0.791388	3.31825e-42
CLEC10A	0.772689	5.05268e-08
CCND1	0.767879	5.1044e-19
TMEM14C	0.74373	7.1557e-41
PHLDA2	0.720465	4.54755e-21
PAK1	0.706651	1.076e-23
CSF1R	0.667696	7.71957e-11
RNASET2	0.655142	3.46609e-08
NGFRAP1	0.639499	7.33323e-10
RGS10	0.638029	8.17163e-51
PTMS	0.637864	4.67296e-14
TRPM4	0.628671	0.000459787
TEX30	0.628425	3.34789e-16
CD33	0.620807	1.62722e-09
GPR84	0.615126	1.61985e-08
FILIP1L	0.607066	2.79537e-16
CDKN2A	0.593671	7.56983e-16
GHRL	0.587723	1.73183e-08
CARD19	0.579031	6.37454e-16
TRIM13	0.560149	0.00193984
CD58	0.52958	1.67546e-18
CAMK1	0.525658	2.50836e-05
PTPN6	0.515277	2.81266e-17
RXRA	0.509304	9.35741e-09
GLRX	0.505084	1.01744e-12
MAP2K1	0.479159	2.59075e-13
PARM1	0.473913	3.09446e-11
RPS19	0.469447	3.0672e-46
LGALS12	0.456567	0.00333157
RPS27L	0.450979	4.25686e-09
PDLIM7	0.443301	4.58668e-10
RHOC	0.404596	2.64387e-05
PON2	0.40198	1.6035e-05
TIGAR	0.374648	1.1435e-05
FAM109A	0.358484	2.61467e-07
FFAR4	0.342811	2.83962e-06
RASL10A	0.306218	0.00101811
RP11-350J20.12	0.272376	7.08716e-06

## Sheet: LCH subset markers (Fig. 3)
Supplementary Table 2.c
LCH cell subset markers
LCH cell subset	Gene symbol	Average logFC	P-value	FDR-adjusted P-value
LCH-S1	HMGB2	1.49799	4.5427e-85	8.56118e-81
LCH-S1	UBE2C	1.44375	1.58434e-71	2.98585e-67
LCH-S1	CCNB1	1.35966	7.74546e-112	1.45971e-107
LCH-S1	CDC20	1.29353	2.90764e-135	5.47974e-131
LCH-S1	CENPF	1.27073	5.39598e-97	1.01693e-92
LCH-S1	KPNA2	1.2117	2.74491e-59	5.17305e-55
LCH-S1	STMN1	1.19387	1.69632e-72	3.19688e-68
LCH-S1	TUBA1B	1.19312	3.92985e-72	7.4062e-68
LCH-S1	PTTG1	1.17956	5.10214e-75	9.6155e-71
LCH-S1	CCNB2	1.13347	5.16315e-112	9.73048e-108
LCH-S1	NUSAP1	1.11899	4.08188e-81	7.6927e-77
LCH-S1	TOP2A	1.1177	1.9499e-83	3.67478e-79
LCH-S1	MKI67	1.09995	3.67429e-78	6.92456e-74
LCH-S1	CDK1	1.05547	3.79637e-50	7.15464e-46
LCH-S1	HMMR	1.04376	1.48387e-139	2.79651e-135
LCH-S1	TUBB4B	0.997	2.17838e-41	4.10538e-37
LCH-S1	HMGN2	0.986942	2.17942e-64	4.10734e-60
LCH-S1	PLK1	0.973306	1.86229e-123	3.50967e-119
LCH-S1	BIRC5	0.967646	1.72742e-96	3.2555e-92
LCH-S1	CKS1B	0.957654	4.74585e-67	8.94403e-63
LCH-S1	CDKN3	0.938573	2.05792e-98	3.87836e-94
LCH-S1	ARL6IP1	0.925059	3.65441e-44	6.88711e-40
LCH-S1	TUBB	0.891961	1.28873e-42	2.42875e-38
LCH-S1	CKS2	0.850755	2.69716e-32	5.08308e-28
LCH-S1	H2AFZ	0.838065	8.79321e-52	1.65717e-47
LCH-S1	HMGB1	0.834413	3.62721e-68	6.83584e-64
LCH-S1	ASPM	0.822177	2.0381e-89	3.841e-85
LCH-S1	HIST1H4C	0.795214	6.92329e-23	1.30476e-18
LCH-S1	TPX2	0.791663	1.78198e-95	3.35831e-91
LCH-S1	UBE2S	0.787879	3.37183e-51	6.35455e-47
LCH-S1	MAD2L1	0.740357	6.28623e-70	1.1847e-65
LCH-S1	HN1	0.73602	3.13439e-32	5.90707e-28
LCH-S1	H2AFV	0.734257	2.75229e-45	5.18697e-41
LCH-S1	NUF2	0.722792	3.79816e-92	7.15801e-88
LCH-S1	DLGAP5	0.714738	3.35714e-160	6.32686e-156
LCH-S1	HMGB3	0.714491	1.73527e-61	3.27029e-57
LCH-S1	CENPE	0.712617	9.6791e-88	1.82412e-83
LCH-S1	SMC4	0.704763	3.2358e-43	6.0982e-39
LCH-S1	AURKB	0.687915	2.29279e-76	4.321e-72
LCH-S1	CDCA3	0.683032	5.9413e-81	1.1197e-76
LCH-S1	AURKA	0.680658	1.41737e-54	2.67117e-50
LCH-S1	PRC1	0.677029	1.63455e-60	3.08047e-56
LCH-S1	CENPA	0.673252	2.38393e-111	4.49276e-107
LCH-S1	NUCKS1	0.671419	1.82692e-39	3.44301e-35
LCH-S1	TROAP	0.640068	8.86931e-142	1.67151e-137
LCH-S1	GTSE1	0.609281	7.84491e-70	1.47845e-65
LCH-S1	RAD21	0.604943	5.92271e-35	1.11619e-30
LCH-S1	CALM2	0.601242	2.66891e-37	5.02983e-33
LCH-S1	CCNA2	0.588	5.3781e-72	1.01356e-67
LCH-S1	DDX39A	0.586873	1.82966e-32	3.44818e-28
LCH-S1	SGOL2	0.584996	1.2522e-62	2.3599e-58
LCH-S1	HNRNPA2B1	0.581931	8.09327e-46	1.52526e-41
LCH-S1	IL22RA2	0.569216	5.34899e-13	1.00807e-08
LCH-S1	DTYMK	0.561367	1.2325e-51	2.32277e-47
LCH-S1	ANP32E	0.560002	4.57418e-29	8.6205e-25
LCH-S1	TUBA1C	0.558603	1.98984e-21	3.75005e-17
LCH-S1	CORO1A	0.538683	2.68797e-26	5.06575e-22
LCH-S1	SKA2	0.538072	8.86653e-35	1.67099e-30
LCH-S1	LSM5	0.52919	4.09539e-34	7.71817e-30
LCH-S1	MS4A4A	0.519014	7.96442e-36	1.50097e-31
LCH-S1	CENPW	0.517442	1.25708e-33	2.3691e-29
LCH-S1	LGALS1	0.517009	6.34863e-21	1.19646e-16
LCH-S1	KIF20B	0.510639	4.37388e-36	8.24301e-32
LCH-S1	SMC2	0.503573	1.27491e-28	2.4027e-24
LCH-S1	BUB3	0.500605	3.97295e-21	7.48743e-17
LCH-S1	CKAP2	0.489515	1.00598e-42	1.89587e-38
LCH-S1	RAN	0.476163	2.06277e-30	3.88749e-26
LCH-S1	TACC3	0.469359	9.24966e-35	1.74319e-30
LCH-S1	KIF23	0.464177	2.90623e-49	5.47708e-45
LCH-S1	KIF22	0.461561	7.6601e-31	1.44362e-26
LCH-S1	TACSTD2	0.460618	1.43034e-16	2.69561e-12
LCH-S1	CEP55	0.456164	6.00688e-49	1.13206e-44
LCH-S1	TNF	0.454928	5.21708e-11	9.83211e-07
LCH-S1	NDC80	0.45415	3.26901e-46	6.16077e-42
LCH-S1	LMNB1	0.453109	1.22023e-29	2.29965e-25
LCH-S1	KNSTRN	0.451738	1.22282e-61	2.30453e-57
LCH-S1	PIF1	0.447529	1.69323e-100	3.19107e-96
LCH-S1	TMPO	0.44541	4.07674e-32	7.68303e-28
LCH-S1	SPTSSB	0.44258	2.85392e-16	5.3785e-12
LCH-S1	HSP90B1	0.437532	8.46766e-14	1.59581e-09
LCH-S1	MZT1	0.437077	1.0481e-22	1.97525e-18
LCH-S1	CALM3	0.432265	6.67773e-25	1.25848e-20
LCH-S1	CASC5	0.428823	2.65614e-68	5.00576e-64
LCH-S1	KIF2C	0.424535	1.13316e-65	2.13556e-61
LCH-S1	CCT5	0.422577	1.12923e-15	2.12814e-11
LCH-S1	KIAA0101	0.421133	3.24282e-22	6.11142e-18
LCH-S1	LBR	0.42023	9.99861e-24	1.88434e-19
LCH-S1	DCXR	0.414688	3.24082e-16	6.10765e-12
LCH-S1	NUDT1	0.407525	1.35768e-20	2.55868e-16
LCH-S1	PPP1CA	0.406508	1.8863e-19	3.55492e-15
LCH-S1	ZWINT	0.40519	2.94559e-24	5.55126e-20
LCH-S1	COX8A	0.403829	1.10022e-27	2.07347e-23
LCH-S1	TXNDC12	0.400194	1.11612e-24	2.10344e-20
LCH-S1	PTMS	0.398192	6.69788e-13	1.26228e-08
LCH-S1	MZT2B	0.39748	2.9176e-20	5.49851e-16
LCH-S1	CDK2AP2	0.396168	6.9383e-13	1.30759e-08
LCH-S1	MRPS18C	0.394549	5.51169e-17	1.03873e-12
LCH-S1	ILF2	0.392355	1.38481e-14	2.60982e-10
LCH-S1	DEPDC1	0.392225	2.8996e-57	5.46459e-53
LCH-S1	KIFC1	0.389038	1.3202e-35	2.48805e-31
LCH-S1	CAPG	0.387223	7.53623e-28	1.42028e-23
LCH-S1	LDHA	0.386898	1.67288e-09	3.15271e-05
LCH-S1	HP1BP3	0.38631	3.77872e-21	7.12138e-17
LCH-S1	GGH	0.384708	5.31331e-24	1.00135e-19
LCH-S1	NCAPG	0.381727	6.17258e-32	1.16328e-27
LCH-S1	ANP32B	0.380187	1.74036e-18	3.27988e-14
LCH-S1	CBR3	0.378134	8.55726e-17	1.6127e-12
LCH-S1	CD1A	0.377602	1.35169e-12	2.54739e-08
LCH-S1	SGOL1	0.377437	3.4887e-28	6.5748e-24
LCH-S1	LGALS12	0.377404	9.79117e-26	1.84524e-21
LCH-S1	PLEK2	0.376984	2.02075e-11	3.8083e-07
LCH-S1	RAC2	0.376095	6.76565e-16	1.27505e-11
LCH-S1	UBE2T	0.375972	4.76547e-26	8.981e-22
LCH-S1	DCTN3	0.375619	8.55278e-15	1.61186e-10
LCH-S1	LSM4	0.374964	9.29488e-16	1.75171e-11
LCH-S1	EMP1	0.368727	1.53708e-10	2.89679e-06
LCH-S1	CKAP2L	0.367782	3.69602e-39	6.96552e-35
LCH-S1	GPSM2	0.367177	6.66873e-43	1.25679e-38
LCH-S1	HMG20B	0.364783	4.4572e-19	8.40004e-15
LCH-S1	SFPQ	0.364546	3.5e-11	6.59609e-07
LCH-S1	HNRNPA1	0.350891	1.28798e-26	2.42732e-22
LCH-S1	KIF14	0.350531	5.65073e-58	1.06494e-53
LCH-S1	RACGAP1	0.350376	5.29021e-42	9.96993e-38
LCH-S1	BUB1	0.348197	9.57215e-41	1.80397e-36
LCH-S1	CALR	0.347317	4.12702e-09	7.77779e-05
LCH-S1	MRPL51	0.34701	6.04979e-15	1.14014e-10
LCH-S1	EMC9	0.345013	3.34933e-36	6.31216e-32
LCH-S1	CNIH4	0.343076	1.84905e-18	3.48471e-14
LCH-S1	CDC25B	0.342433	1.30002e-49	2.45001e-45
LCH-S1	CALM1	0.337124	8.52616e-13	1.60684e-08
LCH-S1	RBMX	0.33559	2.79681e-13	5.27087e-09
LCH-S1	PSMA4	0.33202	5.45026e-20	1.02716e-15
LCH-S1	NEK2	0.331404	1.74564e-54	3.28983e-50
LCH-S1	RPA3	0.331357	2.37933e-13	4.48408e-09
LCH-S1	2007-09-01	0.331282	3.07904e-16	5.80276e-12
LCH-S1	ANAPC11	0.329886	2.97711e-12	5.61066e-08
LCH-S1	S100A4	0.329839	3.0608e-12	5.76839e-08
LCH-S1	DCK	0.328142	1.26815e-15	2.38996e-11
LCH-S1	CLIC1	0.3278	1.02704e-14	1.93556e-10
LCH-S1	PRR11	0.327359	1.98892e-33	3.74831e-29
LCH-S1	SNRPB	0.326993	1.00637e-09	1.89661e-05
LCH-S1	RBM8A	0.326264	6.93503e-15	1.30698e-10
LCH-S1	MANF	0.32507	8.44256e-09	0.000159108
LCH-S1	CKAP5	0.323675	1.46792e-37	2.76644e-33
LCH-S1	PDIA6	0.315628	2.05782e-11	3.87816e-07
LCH-S1	HADHA	0.314295	7.54538e-15	1.422e-10
LCH-S1	H2AFX	0.314001	9.80202e-17	1.84729e-12
LCH-S1	GTF2A2	0.311982	1.86875e-10	3.52184e-06
LCH-S1	GTF3C5	0.311273	2.64319e-13	4.98135e-09
LCH-S1	PTGES3	0.311126	2.02745e-14	3.82092e-10
LCH-S1	HSD17B11	0.309152	1.8489e-12	3.48443e-08
LCH-S1	CAP1	0.308852	1.12613e-14	2.12231e-10
LCH-S1	VDAC3	0.308679	1.64181e-09	3.09416e-05
LCH-S1	FAM64A	0.30844	1.53841e-68	2.89929e-64
LCH-S1	PLIN3	0.306154	8.70414e-11	1.64038e-06
LCH-S1	PDLIM2	0.30467	3.13222e-09	5.90299e-05
LCH-S1	TMEM71	0.304342	5.83221e-36	1.09914e-31
LCH-S1	PSMB8	0.303908	5.71076e-09	0.000107625
LCH-S1	TYMS	0.303687	2.16961e-19	4.08884e-15
LCH-S1	BANF1	0.303686	3.9056e-13	7.36048e-09
LCH-S1	MAGOH	0.30345	2.17703e-13	4.10283e-09
LCH-S1	SPC25	0.302813	1.66269e-24	3.13351e-20
LCH-S1	SHCBP1	0.302086	9.56046e-31	1.80176e-26
LCH-S1	SRP9	0.301419	1.77237e-10	3.3402e-06
LCH-S1	COX17	0.29865	6.74113e-11	1.27043e-06
LCH-S1	NUP37	0.298303	1.0146e-12	1.91212e-08
LCH-S1	NAA38	0.296404	2.14422e-10	4.041e-06
LCH-S1	KRT10	0.295613	1.07104e-09	2.01848e-05
LCH-S1	REEP4	0.295018	3.94069e-17	7.42662e-13
LCH-S1	PHF19	0.294673	1.19556e-23	2.25315e-19
LCH-S1	HJURP	0.292698	1.71041e-33	3.22344e-29
LCH-S1	CDCA8	0.292581	5.751e-32	1.08383e-27
LCH-S1	PSMC3	0.292015	1.68491e-09	3.17538e-05
LCH-S1	CDCA2	0.291968	4.29091e-32	8.08665e-28
LCH-S1	VPS26A	0.290653	4.372e-09	8.23947e-05
LCH-S1	ARPC2	0.289964	2.2035e-19	4.15271e-15
LCH-S1	TMED9	0.289431	3.4934e-12	6.58366e-08
LCH-S1	TUBA1A	0.288757	8.49334e-09	0.000160066
LCH-S1	RGS19	0.288488	5.46133e-13	1.02924e-08
LCH-S1	CENPN	0.28787	7.71466e-27	1.45391e-22
LCH-S1	NCAPH	0.28735	1.78282e-34	3.35991e-30
LCH-S1	DEK	0.287038	1.08976e-10	2.05376e-06
LCH-S1	MZT2A	0.286913	1.07477e-11	2.02552e-07
LCH-S1	LSM3	0.285015	5.46295e-14	1.02955e-09
LCH-S1	KIF11	0.284942	1.87313e-26	3.5301e-22
LCH-S1	MND1	0.28217	2.51034e-26	4.73098e-22
LCH-S1	VAMP8	0.282148	5.64078e-18	1.06306e-13
LCH-S1	IDH2	0.281864	2.68612e-09	5.06226e-05
LCH-S1	HAX1	0.281702	3.25982e-13	6.14345e-09
LCH-S1	EXOSC8	0.279934	6.02551e-12	1.13557e-07
LCH-S1	HMGN1	0.278781	8.46397e-15	1.59512e-10
LCH-S1	CDKN2C	0.278217	4.12806e-16	7.77974e-12
LCH-S1	NUCB2	0.277926	2.88922e-13	5.44502e-09
LCH-S1	OIP5	0.277745	1.13863e-27	2.14586e-23
LCH-S1	PSMB6	0.275247	1.46979e-11	2.76997e-07
LCH-S1	HNRNPA3	0.273661	3.8428e-10	7.24215e-06
LCH-S1	PDLIM7	0.271782	2.9727e-09	5.60234e-05
LCH-S1	CNTRL	0.271049	3.16678e-15	5.96812e-11
LCH-S1	MXD3	0.270097	1.17192e-28	2.20861e-24
LCH-S1	STIP1	0.270019	3.79711e-09	7.15604e-05
LCH-S1	CENPK	0.265898	1.26774e-15	2.38917e-11
LCH-S1	XRCC5	0.264848	4.16264e-10	7.84491e-06
LCH-S1	VRK1	0.26224	5.37765e-13	1.01347e-08
LCH-S1	HNRNPK	0.261226	3.09646e-10	5.83559e-06
LCH-S1	ANP32A	0.257805	3.67062e-08	0.000691766
LCH-S1	BLOC1S1	0.255834	6.24741e-12	1.17739e-07
LCH-S11	CCR7	1.55446	6.00237e-49	1.13121e-44
LCH-S11	BIRC3	1.48419	3.33364e-72	6.28258e-68
LCH-S11	MARCKSL1	1.30943	1.99605e-65	3.76176e-61
LCH-S11	G0S2	1.15313	5.1485e-22	9.70286e-18
LCH-S11	CD83	1.14845	1.38193e-83	2.60438e-79
LCH-S11	CCL22	1.09294	7.04136e-40	1.32702e-35
LCH-S11	FSCN1	1.08204	8.79642e-60	1.65777e-55
LCH-S11	LAMP3	0.848759	1.15934e-54	2.1849e-50
LCH-S11	NFKBIA	0.823781	2.10784e-64	3.97244e-60
LCH-S11	TNFAIP2	0.806803	3.60554e-59	6.79501e-55
LCH-S11	TXN	0.793552	2.36945e-21	4.46547e-17
LCH-S11	MARCKS	0.763347	3.42042e-63	6.44612e-59
LCH-S11	CFP	0.762631	1.61408e-34	3.04189e-30
LCH-S11	IL4I1	0.733448	4.50813e-49	8.49602e-45
LCH-S11	CXCR4	0.721048	3.94803e-30	7.44045e-26
LCH-S11	GPR183	0.720089	4.54597e-29	8.56734e-25
LCH-S11	ALDH2	0.68658	9.03591e-35	1.70291e-30
LCH-S11	TMEM176B	0.681693	4.47516e-26	8.43389e-22
LCH-S11	AOC1	0.677404	3.27114e-25	6.16479e-21
LCH-S11	BCL2A1	0.668646	1.41612e-19	2.66882e-15
LCH-S11	BTG1	0.666848	4.18549e-41	7.88798e-37
LCH-S11	PNRC1	0.66073	2.17147e-44	4.09234e-40
LCH-S11	TMEM176A	0.652179	4.02792e-25	7.59102e-21
LCH-S11	CSF2RA	0.650162	4.12827e-33	7.78015e-29
LCH-S11	RGS1	0.629862	8.19618e-30	1.54465e-25
LCH-S11	CDKN1A	0.623841	4.27728e-20	8.06095e-16
LCH-S11	IL1RN	0.600607	2.70797e-23	5.10343e-19
LCH-S11	CST7	0.593281	9.69706e-28	1.82751e-23
LCH-S11	IL7R	0.590984	7.87731e-17	1.48456e-12
LCH-S11	FTH1	0.5887	2.3554e-37	4.43899e-33
LCH-S11	TRAF1	0.577128	6.40496e-55	1.20708e-50
LCH-S11	DUSP5	0.569761	3.01742e-80	5.68664e-76
LCH-S11	TBC1D4	0.564564	2.85079e-13	5.37259e-09
LCH-S11	LAD1	0.558204	4.27152e-67	8.05011e-63
LCH-S11	RAB9A	0.550615	1.07074e-15	2.01791e-11
LCH-S11	SYNGR2	0.544046	3.29911e-37	6.21751e-33
LCH-S11	SAMSN1	0.52974	1.59497e-07	0.00300588
LCH-S11	GPR157	0.523961	2.36131e-85	4.45013e-81
LCH-S11	HLA-DQB2	0.51908	7.29131e-08	0.00137412
LCH-S11	IER3	0.516671	1.12685e-32	2.12365e-28
LCH-S11	HLA-DQA2	0.498836	3.05652e-11	5.76033e-07
LCH-S11	REL	0.498489	1.21414e-14	2.28817e-10
LCH-S11	EBI3	0.494667	2.24704e-10	4.23478e-06
LCH-S11	CLPTM1	0.49348	3.80926e-19	7.17894e-15
LCH-S11	SOCS1	0.488812	9.29671e-44	1.75206e-39
LCH-S11	CXCL14	0.487583	3.50016e-08	0.00065964
LCH-S11	NINJ1	0.485357	8.44162e-26	1.59091e-21
LCH-S11	NUB1	0.48495	8.0094e-12	1.50945e-07
LCH-S11	SERPINF1	0.479825	2.33369e-27	4.39808e-23
LCH-S11	PIM3	0.479049	5.59784e-22	1.05497e-17
LCH-S11	GSTP1	0.477627	4.5479e-10	8.57097e-06
LCH-S11	GADD45B	0.475594	1.93973e-26	3.65561e-22
LCH-S11	RASSF4	0.471293	6.17043e-14	1.16288e-09
LCH-S11	RELB	0.458846	1.35375e-29	2.55127e-25
LCH-S11	KYNU	0.441569	6.74699e-12	1.27154e-07
LCH-S11	CD40	0.433722	2.48009e-24	4.67398e-20
LCH-S11	PLEK	0.423077	1.575e-11	2.96825e-07
LCH-S11	GPX4	0.416136	1.58509e-23	2.98726e-19
LCH-S11	DAPP1	0.411872	1.79966e-16	3.39164e-12
LCH-S11	DUSP2	0.404676	1.7308e-19	3.26186e-15
LCH-S11	NABP1	0.399634	1.72393e-19	3.24891e-15
LCH-S11	SERPINB9	0.390662	2.1829e-09	4.11389e-05
LCH-S11	LSP1	0.381589	2.41486e-13	4.55104e-09
LCH-S11	GPR137B	0.381307	1.36679e-08	0.000257586
LCH-S11	JUNB	0.381209	4.64382e-30	8.75174e-26
LCH-S11	SQSTM1	0.378133	5.40839e-08	0.00101926
LCH-S11	POGLUT1	0.372907	1.58065e-30	2.97889e-26
LCH-S11	ETV3	0.371141	4.65485e-46	8.77254e-42
LCH-S11	ZFP36L1	0.369327	5.19663e-11	9.79357e-07
LCH-S11	ASMTL	0.357477	4.68454e-23	8.82848e-19
LCH-S11	HLA-DPB1	0.357173	7.08254e-27	1.33478e-22
LCH-S11	ZFAS1	0.356333	3.72416e-14	7.01855e-10
LCH-S11	ZFAND5	0.352801	1.15023e-10	2.16772e-06
LCH-S11	IFI30	0.351864	6.30835e-28	1.18887e-23
LCH-S11	RPL35A	0.35077	1.93378e-51	3.64439e-47
LCH-S11	EEF1A1	0.349777	4.05785e-59	7.64742e-55
LCH-S11	IL10RA	0.335833	2.65881e-21	5.0108e-17
LCH-S11	SPIB	0.331009	1.59421e-25	3.00444e-21
LCH-S11	CFLAR	0.330559	6.42091e-20	1.21009e-15
LCH-S11	KDM2B	0.312034	7.8666e-17	1.48254e-12
LCH-S11	GNG11	0.309358	1.97539e-20	3.72281e-16
LCH-S11	EIF1	0.306467	4.29075e-34	8.08635e-30
LCH-S11	MYO1G	0.304401	2.89763e-13	5.46088e-09
LCH-S11	FAM49A	0.299883	3.28843e-12	6.19738e-08
LCH-S11	SOCS3	0.295532	2.31817e-17	4.36883e-13
LCH-S11	RPL10	0.282199	3.00951e-57	5.67173e-53
LCH-S11	PPP1R15A	0.279771	5.04604e-08	0.000950976
LCH-S12	DNASE1L3	1.55746	1.62648e-33	3.06527e-29
LCH-S12	IRF8	1.52292	5.7011e-18	1.07443e-13
LCH-S12	CLEC9A	1.42018	1.35897e-185	2.56111e-181
LCH-S12	BATF3	0.957168	5.16525e-51	9.73444e-47
LCH-S12	CADM1	0.913798	8.1669e-54	1.53913e-49
LCH-S12	WDFY4	0.826506	9.46902e-25	1.78453e-20
LCH-S12	RGCC	0.809521	7.87945e-11	1.48496e-06
LCH-S12	RP11-1143G9.4	0.772896	1.11195e-17	2.09558e-13
LCH-S12	SNX3	0.768872	1.31446e-09	2.47724e-05
LCH-S12	TMSB4X	0.691914	1.38665e-10	2.61329e-06
LCH-S12	RAB7B	0.68958	4.93665e-19	9.30361e-15
LCH-S12	CLNK	0.635629	6.57298e-12	1.23874e-07
LCH-S12	XCR1	0.560562	5.5108e-127	1.03856e-122
LCH-S12	SLAMF7	0.520459	5.32889e-33	1.00428e-28
LCH-S12	ENPP1	0.498065	3.1431e-27	5.92348e-23
LCH-S12	LSP1	0.430587	2.89928e-13	5.46399e-09
LCH-S12	GYPC	0.422345	3.07698e-21	5.79888e-17
LCH-S12	LGMN	0.39049	1.04247e-07	0.00196463
LCH-S12	FGD2	0.389889	1.9019e-08	0.000358433
LCH-S12	THBD	0.387421	2.96796e-15	5.59342e-11
LCH-S12	IGFBP7	0.381203	1.66302e-27	3.13413e-23
LCH-S12	CD38	0.274708	1.16372e-26	2.19315e-22
LCH-S13	ISG15	1.05744	3.90838e-17	7.36574e-13
LCH-S13	IFIT1	0.799622	4.54234e-17	8.56049e-13
LCH-S13	MX1	0.763849	3.19192e-17	6.01549e-13
LCH-S13	IFI6	0.753309	6.43373e-23	1.2125e-18
LCH-S13	LY6E	0.74641	6.38055e-26	1.20248e-21
LCH-S13	MT2A	0.670827	8.75559e-10	1.65008e-05
LCH-S13	IFIT3	0.665024	4.67807e-18	8.81629e-14
LCH-S13	CD14	0.652662	9.53285e-11	1.79656e-06
LCH-S13	IFITM3	0.649878	1.01237e-30	1.90791e-26
LCH-S13	HLA-DRB5	0.630539	1.84326e-10	3.47382e-06
LCH-S13	FCGR2B	0.607677	1.14043e-29	2.14925e-25
LCH-S13	MMP12	0.601976	3.55534e-08	0.000670039
LCH-S13	IFI44L	0.587931	9.16454e-25	1.72715e-20
LCH-S13	IFIT2	0.565253	1.97711e-20	3.72607e-16
LCH-S13	MS4A6A	0.555067	1.60027e-09	3.01586e-05
LCH-S13	FCER1G	0.533467	9.92983e-31	1.87138e-26
LCH-S13	NCF1	0.530115	2.27784e-15	4.29281e-11
LCH-S13	TNFSF10	0.514842	4.4419e-13	8.3712e-09
LCH-S13	BST2	0.484285	2.11494e-16	3.98582e-12
LCH-S13	MNDA	0.464978	3.21233e-08	0.000605396
LCH-S13	CARD16	0.424374	7.47526e-14	1.40879e-09
LCH-S13	STAT1	0.419247	2.29388e-09	4.32305e-05
LCH-S13	UBE2L6	0.41547	3.1863e-14	6.00489e-10
LCH-S13	IFITM2	0.411301	3.15561e-19	5.94707e-15
LCH-S13	OAS1	0.410591	2.75786e-19	5.19746e-15
LCH-S13	CASP1	0.404974	1.29378e-25	2.43826e-21
LCH-S13	TYMP	0.398883	9.94115e-11	1.87351e-06
LCH-S13	CD1E	0.38794	1.38349e-11	2.60733e-07
LCH-S13	TXNIP	0.382566	4.79087e-13	9.02888e-09
LCH-S13	IFI44	0.377298	1.08965e-10	2.05356e-06
LCH-S13	TYROBP	0.365839	2.84773e-37	5.36682e-33
LCH-S13	RNASET2	0.361077	2.58256e-10	4.8671e-06
LCH-S13	CTSS	0.353145	9.64918e-14	1.81849e-09
LCH-S13	PLSCR1	0.352819	7.86015e-11	1.48132e-06
LCH-S13	IFI35	0.350983	1.64888e-07	0.00310749
LCH-S13	EPSTI1	0.343875	8.92264e-10	1.68156e-05
LCH-S13	HERC5	0.343868	3.72383e-17	7.01794e-13
LCH-S13	ITM2B	0.331009	3.5914e-18	6.76836e-14
LCH-S13	GBP1	0.323681	2.39588e-11	4.51527e-07
LCH-S13	OASL	0.320408	7.69734e-24	1.45064e-19
LCH-S13	PKIB	0.274417	1.73019e-10	3.26071e-06
LCH-S13	HLA-DMB	0.2667	4.56064e-11	8.59498e-07
LCH-S14	ACP5	2.87426	3.93478e-23	7.41548e-19
LCH-S14	CTSK	2.59214	3.9432e-14	7.43135e-10
LCH-S14	CKB	2.18557	9.35086e-17	1.76226e-12
LCH-S14	APOE	2.13895	1.71141e-07	0.00322532
LCH-S14	MMP9	1.77676	1.51327e-22	2.8519e-18
LCH-S14	CSTB	1.35896	2.14851e-09	4.04907e-05
LCH-S14	APOC1	1.35659	1.20211e-11	2.2655e-07
LCH-S14	RAB13	1.23434	4.40008e-26	8.29239e-22
LCH-S14	NPC2	1.13447	1.59116e-14	2.99869e-10
LCH-S14	COL6A1	1.10387	5.0086e-39	9.43921e-35
LCH-S14	TCIRG1	1.05797	4.44566e-14	8.3783e-10
LCH-S14	COL6A2	1.03945	1.70361e-45	3.21063e-41
LCH-S14	CD68	1.02032	1.51511e-09	2.85537e-05
LCH-S14	ANPEP	0.966098	5.87478e-14	1.10716e-09
LCH-S14	PLTP	0.96229	3.36324e-43	6.33836e-39
LCH-S14	CTSD	0.921227	7.18096e-09	0.000135332
LCH-S14	SLC9B2	0.890764	3.1062e-16	5.85395e-12
LCH-S14	SIGLEC15	0.883061	3.59606e-91	6.77713e-87
LCH-S14	MRPS6	0.880714	1.95185e-07	0.00367845
LCH-S14	NEAT1	0.865636	3.30267e-08	0.000622421
LCH-S14	TSC22D1	0.858745	5.04008e-12	9.49853e-08
LCH-S14	LGALS3	0.770008	1.1371e-07	0.00214299
LCH-S14	S100A3	0.752106	2.65584e-44	5.00521e-40
LCH-S14	ATP6V1F	0.746081	2.81199e-09	5.29947e-05
LCH-S14	NFATC1	0.736364	2.36807e-20	4.46287e-16
LCH-S14	MATK	0.680809	1.29481e-79	2.4402e-75
LCH-S14	NRP2	0.675297	2.23892e-17	4.21947e-13
LCH-S14	PRKCDBP	0.672711	1.09131e-08	0.000205668
LCH-S14	SLC5A3	0.656434	7.28318e-14	1.37259e-09
LCH-S14	CD63	0.647602	4.07462e-15	7.67903e-11
LCH-S14	GPX1	0.617223	3.6164e-13	6.81546e-09
LCH-S14	MAP4K4	0.580158	1.58931e-18	2.99522e-14
LCH-S14	HEXB	0.572764	4.9063e-10	9.24641e-06
LCH-S14	PDLIM4	0.570146	2.66621e-14	5.02473e-10
LCH-S14	CD9	0.563798	2.13764e-09	4.02859e-05
LCH-S14	RCAN1	0.561836	8.57631e-30	1.61629e-25
LCH-S14	PHLDA1	0.560687	2.15974e-07	0.00407025
LCH-S14	FAM195A	0.556298	5.5079e-22	1.03802e-17
LCH-S14	GPNMB	0.553886	3.8782e-41	7.30885e-37
LCH-S14	SLC39A8	0.545528	3.91763e-08	0.000738317
LCH-S14	FBP1	0.544593	1.75685e-07	0.00331096
LCH-S14	SQSTM1	0.529632	2.58684e-07	0.00487516
LCH-S14	FOSL2	0.501416	2.40064e-13	4.52424e-09
LCH-S14	JDP2	0.49985	1.39898e-29	2.63652e-25
LCH-S14	TIMP2	0.481168	3.64356e-19	6.86666e-15
LCH-S14	ACTN1	0.480321	9.86373e-10	1.85892e-05
LCH-S14	HPCAL1	0.475133	1.7611e-09	3.31897e-05
LCH-S14	SLCO4A1	0.45968	9.42034e-08	0.00177536
LCH-S14	MTSS1	0.454632	9.87791e-10	1.86159e-05
LCH-S14	ADSS	0.441631	7.06775e-08	0.00133199
LCH-S14	ATP6V0D2	0.42037	1.70115e-29	3.20599e-25
LCH-S14	STEAP1	0.416296	1.9353e-28	3.64726e-24
LCH-S14	ABHD2	0.413084	4.98343e-14	9.39177e-10
LCH-S14	SOX4	0.411644	3.70234e-21	6.97743e-17
LCH-S14	MITF	0.408986	1.04355e-39	1.96667e-35
LCH-S14	A2M	0.403407	3.9346e-13	7.41515e-09
LCH-S14	APP	0.395599	3.55794e-18	6.70529e-14
LCH-S14	HIST1H2AC	0.376636	3.92022e-11	7.38805e-07
LCH-S14	GBP2	0.373033	1.69908e-08	0.000320208
LCH-S14	MAP2K3	0.369231	1.09154e-07	0.00205711
LCH-S14	PRDM1	0.359397	4.6425e-09	8.74926e-05
LCH-S14	CD109	0.347371	7.55731e-08	0.00142425
LCH-S14	DUSP14	0.346695	2.64301e-19	4.98101e-15
LCH-S14	CTSL	0.322177	1.31696e-22	2.48194e-18
LCH-S14	HYAL2	0.288245	3.52085e-08	0.000663539
LCH-S14	VNN1	0.287063	3.34381e-14	6.30174e-10
LCH-S2	HIST1H4C	1.14163	1.55072e-41	2.92248e-37
LCH-S2	KIAA0101	1.11701	3.9757e-124	7.4926e-120
LCH-S2	PCNA	1.06602	3.79443e-115	7.15098e-111
LCH-S2	TK1	1.02166	3.87893e-119	7.31024e-115
LCH-S2	TYMS	0.96591	4.03878e-117	7.61149e-113
LCH-S2	DUT	0.961217	1.27278e-96	2.39867e-92
LCH-S2	TUBB	0.884802	9.01554e-61	1.69907e-56
LCH-S2	STMN1	0.870344	2.32891e-72	4.38906e-68
LCH-S2	H2AFZ	0.854843	1.50121e-68	2.82918e-64
LCH-S2	MCM7	0.841	1.68043e-98	3.16693e-94
LCH-S2	RRM2	0.776752	8.20406e-102	1.54614e-97
LCH-S2	ZWINT	0.731108	1.70376e-90	3.21091e-86
LCH-S2	CDK1	0.708129	7.0783e-67	1.33398e-62
LCH-S2	FEN1	0.695454	4.37919e-89	8.25303e-85
LCH-S2	TUBA1B	0.68747	4.15862e-58	7.83733e-54
LCH-S2	RANBP1	0.678759	7.40005e-64	1.39461e-59
LCH-S2	RPA3	0.634303	3.98487e-65	7.50988e-61
LCH-S2	CKS1B	0.633667	7.41152e-65	1.39678e-60
LCH-S2	HMGB2	0.624559	8.24372e-47	1.55361e-42
LCH-S2	CENPM	0.619743	5.83894e-108	1.10041e-103
LCH-S2	MCM3	0.609192	6.62291e-71	1.24815e-66
LCH-S2	HELLS	0.598591	1.76219e-107	3.32103e-103
LCH-S2	HMGB1	0.598256	3.54945e-60	6.68929e-56
LCH-S2	CENPU	0.595532	3.56418e-84	6.71706e-80
LCH-S2	DHFR	0.595311	3.20324e-86	6.03683e-82
LCH-S2	CARHSP1	0.592669	2.43592e-56	4.59073e-52
LCH-S2	CLSPN	0.591425	2.96005e-94	5.57851e-90
LCH-S2	MCM5	0.575388	7.296e-37	1.375e-32
LCH-S2	IDH2	0.556143	1.01444e-46	1.91182e-42
LCH-S2	TEX30	0.551729	8.55309e-38	1.61192e-33
LCH-S2	PLEK2	0.544545	2.38754e-52	4.49956e-48
LCH-S2	SPINK2	0.534012	5.85897e-09	0.000110418
LCH-S2	MKI67	0.532987	1.37116e-44	2.58408e-40
LCH-S2	TMEM106C	0.524869	2.92856e-75	5.51917e-71
LCH-S2	LDHB	0.524818	1.14189e-52	2.152e-48
LCH-S2	SLBP	0.521707	1.07718e-40	2.03005e-36
LCH-S2	NASP	0.513436	7.03173e-43	1.3252e-38
LCH-S2	SVIP	0.512079	6.3559e-47	1.19783e-42
LCH-S2	TACSTD2	0.511815	4.27125e-46	8.0496e-42
LCH-S2	GINS2	0.509158	3.05586e-69	5.75907e-65
LCH-S2	C12orf75	0.509076	2.67444e-25	5.04025e-21
LCH-S2	SIVA1	0.498931	4.29427e-50	8.09299e-46
LCH-S2	RAD51AP1	0.485436	2.14237e-69	4.03751e-65
LCH-S2	FAM111A	0.483474	1.15036e-47	2.16796e-43
LCH-S2	DNMT1	0.483473	5.32763e-43	1.00405e-38
LCH-S2	GGH	0.476232	1.45377e-57	2.73978e-53
LCH-S2	SPC25	0.463737	9.91849e-64	1.86924e-59
LCH-S2	SMC2	0.463421	5.90936e-44	1.11368e-39
LCH-S2	SNRNP25	0.461729	4.76278e-34	8.97593e-30
LCH-S2	ESCO2	0.457002	2.05084e-63	3.86501e-59
LCH-S2	PSIP1	0.455948	1.71832e-42	3.23834e-38
LCH-S2	UBE2T	0.454558	3.93858e-59	7.42264e-55
LCH-S2	HMGN2	0.454042	3.72227e-34	7.01499e-30
LCH-S2	PA2G4	0.447707	3.80601e-34	7.1728e-30
LCH-S2	NUSAP1	0.444315	5.36623e-42	1.01132e-37
LCH-S2	RRM1	0.443986	1.13484e-56	2.13873e-52
LCH-S2	TPM2	0.443874	8.70677e-13	1.64088e-08
LCH-S2	DBI	0.440441	2.56338e-19	4.83095e-15
LCH-S2	SMC4	0.440225	9.89766e-35	1.86531e-30
LCH-S2	HAT1	0.43939	1.99969e-39	3.76862e-35
LCH-S2	DNAJC9	0.438862	1.02726e-51	1.93598e-47
LCH-S2	SNRPD1	0.429344	9.95887e-36	1.87685e-31
LCH-S2	CTSW	0.427575	1.00443e-24	1.89295e-20
LCH-S2	PSMC3	0.427444	4.59351e-35	8.65693e-31
LCH-S2	ASF1B	0.422741	1.17356e-62	2.21169e-58
LCH-S2	GMNN	0.419599	5.56662e-57	1.04908e-52
LCH-S2	DEK	0.41897	4.84853e-24	9.13754e-20
LCH-S2	RNASEH2A	0.4189	4.22344e-38	7.9595e-34
LCH-S2	FAM111B	0.415973	2.72215e-74	5.13017e-70
LCH-S2	PRIM1	0.41433	2.19929e-49	4.14478e-45
LCH-S2	STRA13	0.414183	6.15872e-36	1.16067e-31
LCH-S2	WDR34	0.413713	3.02107e-57	5.69351e-53
LCH-S2	SLC25A5	0.413182	2.1796e-38	4.10767e-34
LCH-S2	SNRPB	0.412624	1.10571e-34	2.08383e-30
LCH-S2	TPI1	0.405536	4.54621e-52	8.56779e-48
LCH-S2	SLC29A1	0.405273	3.47565e-27	6.55021e-23
LCH-S2	LSM4	0.403743	1.02657e-40	1.93468e-36
LCH-S2	MAD2L1	0.400946	1.15923e-41	2.18468e-37
LCH-S2	LDHA	0.399019	2.06572e-21	3.89305e-17
LCH-S2	RAN	0.39283	3.05032e-32	5.74863e-28
LCH-S2	RFC4	0.391535	6.44211e-47	1.21408e-42
LCH-S2	CENPK	0.391447	1.75818e-51	3.31347e-47
LCH-S2	CAMK1	0.388644	2.86251e-34	5.39469e-30
LCH-S2	PAICS	0.38856	6.0663e-37	1.14326e-32
LCH-S2	CENPW	0.385795	1.04992e-33	1.97868e-29
LCH-S2	MCM6	0.383127	2.00636e-46	3.78119e-42
LCH-S2	SNRPG	0.382338	5.16747e-31	9.73862e-27
LCH-S2	ATAD2	0.382076	2.60739e-47	4.91389e-43
LCH-S2	EBP	0.381276	3.32194e-32	6.26053e-28
LCH-S2	S100A4	0.380981	1.30188e-28	2.45352e-24
LCH-S2	CDK4	0.380476	1.24802e-30	2.35202e-26
LCH-S2	RFC2	0.379925	1.24892e-45	2.35372e-41
LCH-S2	GAPDH	0.379707	1.66041e-42	3.12921e-38
LCH-S2	LMNB1	0.377486	6.33552e-35	1.19399e-30
LCH-S2	CHCHD2	0.377266	3.21751e-43	6.06372e-39
LCH-S2	EIF4EBP1	0.374175	3.37792e-34	6.36603e-30
LCH-S2	CORO1A	0.372988	1.63765e-19	3.08632e-15
LCH-S2	SMC3	0.369513	4.23453e-25	7.98039e-21
LCH-S2	CACYBP	0.368548	1.20456e-28	2.27011e-24
LCH-S2	HNRNPF	0.365164	5.46909e-17	1.0307e-12
LCH-S2	HIST1H1D	0.362379	3.98733e-40	7.51452e-36
LCH-S2	SMC1A	0.359898	7.89037e-39	1.48702e-34
LCH-S2	DTYMK	0.35743	4.16453e-25	7.84847e-21
LCH-S2	HSP90AA1	0.354757	3.10105e-29	5.84424e-25
LCH-S2	NME1	0.354224	1.44249e-27	2.71851e-23
LCH-S2	MND1	0.353886	8.52763e-42	1.60712e-37
LCH-S2	RBBP7	0.353327	3.56204e-23	6.71302e-19
LCH-S2	CD1A	0.352147	8.4607e-29	1.5945e-24
LCH-S2	AURKB	0.35127	9.37161e-31	1.76617e-26
LCH-S2	MAGOHB	0.350557	4.81888e-23	9.08166e-19
LCH-S2	LIG1	0.350081	3.22633e-64	6.08033e-60
LCH-S2	USP1	0.350071	1.24654e-27	2.34923e-23
LCH-S2	XRCC5	0.349567	2.25886e-19	4.25705e-15
LCH-S2	UHRF1	0.347899	8.58675e-50	1.61826e-45
LCH-S2	SNRPE	0.34382	4.73976e-28	8.93255e-24
LCH-S2	DCTPP1	0.343282	2.08656e-25	3.93233e-21
LCH-S2	POLE4	0.341774	3.43094e-22	6.46595e-18
LCH-S2	MZT2A	0.341482	2.34319e-14	4.41598e-10
LCH-S2	ANAPC11	0.337894	2.37469e-22	4.47533e-18
LCH-S2	MCM4	0.336571	5.55778e-51	1.04742e-46
LCH-S2	SSRP1	0.335173	3.74998e-24	7.06721e-20
LCH-S2	SRSF7	0.332763	6.58691e-17	1.24137e-12
LCH-S2	ITGB3BP	0.332439	3.10037e-37	5.84296e-33
LCH-S2	NUDT5	0.3318	1.00692e-16	1.89764e-12
LCH-S2	ANP32B	0.33157	1.99275e-20	3.75554e-16
LCH-S2	LSM3	0.330645	3.12938e-23	5.89763e-19
LCH-S2	TCF19	0.328059	1.56212e-59	2.94398e-55
LCH-S2	NME4	0.326564	2.0446e-17	3.85326e-13
LCH-S2	CENPH	0.321463	4.29264e-33	8.0899e-29
LCH-S2	RNASEH2C	0.320504	5.60087e-20	1.05554e-15
LCH-S2	CA2	0.320464	1.41851e-22	2.67333e-18
LCH-S2	KIF22	0.319211	2.439e-21	4.59655e-17
LCH-S2	CDC45	0.317338	2.95014e-56	5.55984e-52
LCH-S2	CDC6	0.317094	1.33821e-64	2.522e-60
LCH-S2	POLD2	0.316966	8.55192e-24	1.61169e-19
LCH-S2	PPM1G	0.316337	1.42205e-21	2.67999e-17
LCH-S2	ORC6	0.314748	8.13256e-37	1.53266e-32
LCH-S2	HAUS1	0.313971	5.34583e-32	1.00748e-27
LCH-S2	TFDP1	0.310939	9.49909e-29	1.7902e-24
LCH-S2	SMYD3	0.310098	1.52303e-18	2.8703e-14
LCH-S2	SRSF3	0.308898	1.09019e-18	2.05457e-14
LCH-S2	SDF2L1	0.308714	2.72374e-09	5.13316e-05
LCH-S2	CARD19	0.308491	3.84979e-18	7.25532e-14
LCH-S2	H2AFV	0.308259	7.63149e-19	1.43823e-14
LCH-S2	LSM2	0.308113	1.05557e-18	1.98932e-14
LCH-S2	HMGN1	0.307764	7.64572e-31	1.44091e-26
LCH-S2	RAD51C	0.3068	1.14082e-29	2.14999e-25
LCH-S2	ENO1	0.306476	3.19477e-28	6.02086e-24
LCH-S2	CD300A	0.30548	1.09672e-22	2.06687e-18
LCH-S2	GCHFR	0.304834	1.52294e-23	2.87014e-19
LCH-S2	NUDT1	0.303511	1.9135e-21	3.60618e-17
LCH-S2	HSPE1	0.301441	1.19768e-22	2.25714e-18
LCH-S2	FDPS	0.298666	5.08825e-21	9.58932e-17
LCH-S2	C19orf48	0.297593	8.78189e-27	1.65503e-22
LCH-S2	HPRT1	0.297376	1.85135e-20	3.48906e-16
LCH-S2	TUBG1	0.294141	2.8729e-31	5.41426e-27
LCH-S2	COPS3	0.293043	4.53096e-21	8.53905e-17
LCH-S2	HIRIP3	0.291503	1.92551e-31	3.62881e-27
LCH-S2	MZT2B	0.290921	2.30442e-17	4.3429e-13
LCH-S2	COMMD4	0.289455	2.80546e-18	5.28717e-14
LCH-S2	IMPDH2	0.287994	4.6219e-24	8.71043e-20
LCH-S2	PTGES3	0.287514	6.52759e-21	1.23019e-16
LCH-S2	ZDHHC12	0.286833	2.60582e-18	4.91093e-14
LCH-S2	MYBL2	0.285273	1.00425e-43	1.89261e-39
LCH-S2	EXOSC8	0.283853	8.26131e-19	1.55693e-14
LCH-S2	CBX3	0.283398	1.62062e-18	3.05422e-14
LCH-S2	RPL39L	0.282094	1.48635e-26	2.80118e-22
LCH-S2	AP2S1	0.281517	5.16593e-30	9.73572e-26
LCH-S2	PKMYT1	0.280767	3.57598e-55	6.73929e-51
LCH-S2	GGCT	0.278951	9.09045e-19	1.71319e-14
LCH-S2	AKR1B1	0.278599	2.31247e-16	4.35808e-12
LCH-S2	LGALS12	0.277737	3.46188e-20	6.52426e-16
LCH-S2	HNRNPD	0.275391	9.25582e-22	1.74435e-17
LCH-S2	CCT8	0.274583	8.85052e-19	1.66797e-14
LCH-S2	GLO1	0.274223	5.66995e-23	1.06856e-18
LCH-S2	UQCRQ	0.273698	1.62005e-23	3.05315e-19
LCH-S2	PDXK	0.272201	1.29153e-19	2.43402e-15
LCH-S2	VDAC3	0.271862	8.93368e-20	1.68364e-15
LCH-S2	HPGDS	0.271578	3.1023e-17	5.84659e-13
LCH-S2	NUCB2	0.26998	1.37461e-22	2.59059e-18
LCH-S2	HSPD1	0.269313	6.25209e-14	1.17827e-09
LCH-S2	UQCC2	0.268552	1.20891e-17	2.27831e-13
LCH-S2	CCND3	0.26732	7.89201e-17	1.48733e-12
LCH-S2	OCIAD2	0.265053	6.99029e-19	1.31739e-14
LCH-S2	SLC3A2	0.260129	1.3753e-12	2.5919e-08
LCH-S2	MTHFD1	0.257641	6.20771e-22	1.1699e-17
LCH-S2	PHB	0.256572	1.45028e-14	2.73319e-10
LCH-S2	MCM2	0.256236	6.20732e-41	1.16983e-36

## Sheet: Region modules (Fig. 5)
Supplementary Table 2.d
Regulatory region modules
Region ID	Chromosome	Start	End	Region module
r10054	chr13	75310022	75310605	a1
r10068	chr13	75541227	75541642	a1
r10096	chr13	77345361	77345847	a1
r10211	chr13	95271282	95271861	a1
r10348	chr13	104984262	104984906	a1
r10447	chr14	20179327	20179719	a1
r10761	chr14	49193527	49194167	a1
r10949	chr14	59849425	59850125	a1
r11021	chr14	64654297	64654742	a1
r11327	chr14	84129024	84129615	a1
r11359	chr14	89276363	89276920	a1
r11730	chr15	33151056	33151381	a1
r12493	chr15	81269211	81269621	a1
r12521	chr15	82832556	82833305	a1
r12699	chr15	91861233	91861584	a1
r1276	chr1	83761133	83761550	a1
r1300	chr1	84991239	84991909	a1
r1349	chr1	87902819	87903169	a1
r13817	chr16	78893211	78893616	a1
r15760	chr18	22282416	22282850	a1
r15921	chr18	37956860	37957343	a1
r15980	chr18	46009405	46009841	a1
r16104	chr18	55878231	55878571	a1
r16113	chr18	56569113	56569651	a1
r17893	chr2	16630582	16630820	a1
r18134	chr2	30611608	30611961	a1
r18434	chr2	51510310	51510704	a1
r19339	chr2	121596577	121597028	a1
r19517	chr2	143217572	143218133	a1
r19914	chr2	171523262	171523859	a1
r19992	chr2	175373131	175373679	a1
r19993	chr2	175552915	175553487	a1
r20037	chr2	177753734	177754262	a1
r20253	chr2	193907491	193907934	a1
r20320	chr2	197627979	197628502	a1
r20499	chr2	207983616	207984003	a1
r20524	chr2	209380315	209380838	a1
r20745	chr2	224945110	224945555	a1
r20747	chr2	224948899	224949162	a1
r20938	chr2	236871408	236872028	a1
r21939	chr21	16194142	16194610	a1
r22160	chr21	37435119	37435508	a1
r22819	chr3	5423127	5423793	a1
r23305	chr3	39279903	39280421	a1
r23760	chr3	64972779	64973184	a1
r24232	chr3	117722934	117723176	a1
r24726	chr3	150385361	150385725	a1
r24937	chr3	168024551	168025001	a1
r24941	chr3	168156494	168156938	a1
r2498	chr1	174023541	174023884	a1
r25253	chr3	187777323	187777923	a1
r25326	chr3	190566375	190566837	a1
r25395	chr3	194586792	194587200	a1
r25612	chr4	10640517	10640962	a1
r25638	chr4	14856308	14856805	a1
r25665	chr4	16270625	16270981	a1
r25714	chr4	22413468	22413862	a1
r25761	chr4	26088490	26088945	a1
r25794	chr4	33184725	33185181	a1
r26070	chr4	66949380	66949884	a1
r26111	chr4	71338805	71339552	a1
r26121	chr4	73222830	73223400	a1
r26128	chr4	73735264	73735527	a1
r26422	chr4	94548635	94548947	a1
r26476	chr4	100981647	100982136	a1
r26654	chr4	113355551	113356205	a1
r26720	chr4	121185937	121186394	a1
r26752	chr4	122710540	122711018	a1
r2687	chr1	185420548	185421105	a1
r26920	chr4	141353021	141353431	a1
r26995	chr4	145808378	145808739	a1
r27209	chr4	161650790	161651318	a1
r27222	chr4	163591717	163592059	a1
r27277	chr4	168881232	168881714	a1
r27342	chr4	174522093	174522813	a1
r27345	chr4	174613998	174614443	a1
r27391	chr4	182809093	182809512	a1
r28207	chr5	67187352	67187714	a1
r28246	chr5	71782707	71783145	a1
r28688	chr5	107389612	107390109	a1
r28857	chr5	120388305	120388852	a1
r29459	chr5	157248942	157249391	a1
r29495	chr5	159179026	159179358	a1
r29526	chr5	160799144	160799538	a1
r29541	chr5	163696378	163696707	a1
r29558	chr5	167785117	167785586	a1
r29581	chr5	169027525	169028139	a1
r29687	chr5	175691094	175691357	a1
r30129	chr6	16824971	16825711	a1
r3028	chr1	209657125	209657507	a1
r3030	chr1	209673089	209673622	a1
r3043	chr1	209884739	209885069	a1
r30842	chr6	51533881	51534288	a1
r30985	chr6	69881763	69882161	a1
r31727	chr6	132130901	132131246	a1
r32011	chr6	146596014	146596364	a1
r32017	chr6	146876440	146877051	a1
r32407	chr6	167091087	167091478	a1
r32812	chr7	22569886	22570222	a1
r33071	chr7	39589720	39590183	a1
r33160	chr7	47225790	47226176	a1
r33466	chr7	84248292	84248672	a1
r34056	chr7	127594426	127594807	a1
r34190	chr7	135650759	135651365	a1
r34223	chr7	137961282	137961630	a1
r34284	chr7	141960728	141961429	a1
r34306	chr7	142583463	142583775	a1
r35099	chr8	47600630	47601015	a1
r35164	chr8	54858177	54858742	a1
r35417	chr8	76580861	76581234	a1
r35418	chr8	76581804	76582167	a1
r35420	chr8	76672717	76673081	a1
r35472	chr8	80864687	80865114	a1
r3552	chr1	241603667	241604296	a1
r35839	chr8	113437588	113438080	a1
r35955	chr8	120803365	120804066	a1
r35970	chr8	121530423	121530784	a1
r36391	chr9	5438250	5438553	a1
r36571	chr9	21481501	21481997	a1
r36987	chr9	81113289	81113779	a1
r37070	chr9	87614380	87614822	a1
r37309	chr9	105245426	105245778	a1
r37889	chrX	11341904	11342229	a1
r38004	chrX	20362588	20363263	a1
r38037	chrX	24733157	24733576	a1
r38057	chrX	35699654	35700018	a1
r38585	chrX	106802472	106802823	a1
r38652	chrX	115311481	115311934	a1
r3917	chr10	14185538	14186021	a1
r3990	chr10	19974157	19974565	a1
r4188	chr10	33509177	33509550	a1
r4484	chr10	62620631	62621017	a1
r4889	chr10	90847315	90847749	a1
r5027	chr10	99685478	99686026	a1
r5274	chr10	113094105	113094522	a1
r5330	chr10	117237345	117237678	a1
r5911	chr11	16779461	16779829	a1
r7081	chr11	112163964	112164258	a1
r7387	chr11	126345849	126346245	a1
r7401	chr11	127252316	127252868	a1
r7459	chr11	130163828	130164196	a1
r7587	chr12	4472097	4472530	a1
r8832	chr12	91871816	91872144	a1
r911	chr1	50976934	50977539	a1
r9205	chr12	113135706	113136056	a1
r9528	chr13	23384117	23384483	a1
r10008	chr13	69687182	69687363	i12
r10017	chr13	72580180	72580446	i12
r1011	chr1	58784947	58785059	i12
r1013	chr1	58816282	58816673	i12
r10164	chr13	90574743	90574912	i12
r10165	chr13	90710276	90710646	i12
r10212	chr13	95288992	95289250	i12
r10402	chr13	111201644	111201856	i12
r10525	chr14	22853080	22853410	i12
r10547	chr14	23095749	23095882	i12
r10836	chr14	52538704	52538931	i12
r10889	chr14	55373920	55374094	i12
r11359	chr14	89276363	89276920	i12
r11388	chr14	90402156	90402336	i12
r11458	chr14	94346147	94346278	i12
r11613	chr14	105201824	105202072	i12
r11735	chr15	33494405	33494651	i12
r11884	chr15	42495513	42495764	i12
r11891	chr15	42920208	42920340	i12
r1270	chr1	82733726	82733997	i12
r12709	chr15	92071387	92071492	i12
r12787	chr15	98952685	98952842	i12
r13162	chr16	21645532	21645724	i12
r13208	chr16	25585611	25585904	i12
r13611	chr16	67399546	67399649	i12
r13892	chr16	83926764	83926883	i12
r13980	chr16	87974259	87974501	i12
r1464	chr1	94302523	94302872	i12
r1497	chr1	97506431	97506691	i12
r1501	chr1	97828008	97828166	i12
r15126	chr17	64780346	64780605	i12
r1514	chr1	98763884	98764071	i12
r15310	chr17	75270680	75270864	i12
r15835	chr18	29249838	29250191	i12
r15921	chr18	37956860	37957343	i12
r15927	chr18	39384121	39384334	i12
r16104	chr18	55878231	55878571	i12
r16364	chr18	76802073	76802291	i12
r16530	chr19	4067266	4067424	i12
r17569	chr19	53537519	53537716	i12
r1776	chr1	116373551	116373748	i12
r17770	chr2	8334877	8335412	i12
r17883	chr2	15449633	15449912	i12
r1791	chr1	116769763	116769957	i12
r18392	chr2	47783866	47784023	i12
r18430	chr2	50753206	50753588	i12
r18434	chr2	51510310	51510704	i12
r18438	chr2	53022025	53022491	i12
r18798	chr2	74516276	74516640	i12
r18849	chr2	84458662	84458765	i12
r19120	chr2	102619129	102619287	i12
r19142	chr2	105383543	105383790	i12
r19330	chr2	121284560	121284791	i12
r19504	chr2	142724287	142724530	i12
r19517	chr2	143217572	143218133	i12
r19518	chr2	143422756	143422934	i12
r19526	chr2	143937356	143937645	i12
r19527	chr2	143942549	143942814	i12
r19562	chr2	145687659	145688041	i12
r19709	chr2	158730582	158730843	i12
r19917	chr2	171655667	171655944	i12
r19952	chr2	173354584	173355055	i12
r19962	chr2	174247976	174248088	i12
r19985	chr2	175036703	175036893	i12
r19993	chr2	175552915	175553487	i12
r20241	chr2	191887390	191887532	i12
r20290	chr2	196413783	196413989	i12
r20320	chr2	197627979	197628502	i12
r20322	chr2	197711236	197711458	i12
r20434	chr2	204743685	204743869	i12
r20442	chr2	205540169	205540354	i12
r20522	chr2	209268890	209269328	i12
r20678	chr2	219552383	219552839	i12
r20690	chr2	221386186	221386596	i12
r20781	chr2	227462539	227462810	i12
r20866	chr2	232524020	232524190	i12
r20912	chr2	234496364	234496573	i12
r20966	chr2	238027693	238027919	i12
r20969	chr2	238100290	238100621	i12
r20985	chr2	239247912	239248108	i12
r21069	chr20	1741801	1741944	i12
r2109	chr1	155062786	155062889	i12
r21258	chr20	16572985	16573107	i12
r21359	chr20	23009718	23009936	i12
r21479	chr20	33994416	33994561	i12
r21887	chr20	64120472	64120667	i12
r21936	chr21	15742009	15742480	i12
r2341	chr1	166576195	166576337	i12
r239	chr1	12004691	12004961	i12
r23940	chr3	97613265	97613546	i12
r23962	chr3	98732688	98732975	i12
r2404	chr1	169105677	169105959	i12
r24059	chr3	105829868	105830182	i12
r24081	chr3	107524884	107525039	i12
r24105	chr3	108100056	108100276	i12
r24208	chr3	115165286	115165570	i12
r24363	chr3	125766354	125766672	i12
r2441	chr1	172343702	172344090	i12
r24475	chr3	132034998	132035230	i12
r24541	chr3	135924995	135925394	i12
r24822	chr3	156579415	156579641	i12
r24907	chr3	161939938	161940261	i12
r24959	chr3	169769337	169769613	i12
r2498	chr1	174023541	174023884	i12
r25036	chr3	174202657	174202854	i12
r25236	chr3	187104956	187105273	i12
r25320	chr3	190402043	190402386	i12
r25613	chr4	10643744	10643937	i12
r25654	chr4	15841170	15841486	i12
r25705	chr4	20685187	20685426	i12
r25761	chr4	26088490	26088945	i12
r26028	chr4	56468118	56468221	i12
r26218	chr4	78634043	78634340	i12
r26284	chr4	82640193	82640383	i12
r26287	chr4	82984432	82984768	i12
r26422	chr4	94548635	94548947	i12
r26434	chr4	95551607	95551735	i12
r26440	chr4	96581616	96582090	i12
r26690	chr4	118904950	118905195	i12
r26712	chr4	121072299	121072565	i12
r26720	chr4	121185937	121186394	i12
r26733	chr4	121822807	121823004	i12
r273	chr1	15075968	15076241	i12
r27321	chr4	173371928	173372095	i12
r27345	chr4	174613998	174614443	i12
r27353	chr4	175805559	175805961	i12
r27391	chr4	182809093	182809512	i12
r27484	chr4	189583052	189583461	i12
r27573	chr5	10562328	10562437	i12
r27668	chr5	19619666	19619840	i12
r27810	chr5	38582752	38582907	i12
r27869	chr5	40834525	40834636	i12
r27985	chr5	54438649	54439068	i12
r28009	chr5	55233648	55233797	i12
r28324	chr5	76716190	76716378	i12
r28502	chr5	90810325	90810499	i12
r28777	chr5	113444409	113444628	i12
r28904	chr5	124629058	124629445	i12
r29146	chr5	139649553	139649664	i12
r29276	chr5	144275380	144275687	i12
r29291	chr5	146313074	146313384	i12
r29369	chr5	149853012	149853289	i12
r29374	chr5	150052767	150052999	i12
r29479	chr5	157744060	157744232	i12
r29558	chr5	167785117	167785586	i12
r29581	chr5	169027525	169028139	i12
r29650	chr5	172958549	172958906	i12
r3003	chr1	208243320	208243429	i12
r30128	chr6	16771064	16771419	i12
r30169	chr6	20181048	20181305	i12
r30201	chr6	24229729	24229951	i12
r30204	chr6	24504768	24505063	i12
r30357	chr6	28251772	28252043	i12
r30376	chr6	29564905	29565133	i12
r3042	chr1	209866301	209866572	i12
r30652	chr6	39336180	39336398	i12
r30884	chr6	53065858	53066006	i12
r30949	chr6	57673391	57673632	i12
r31028	chr6	73028290	73028560	i12
r31048	chr6	73697429	73697560	i12
r31203	chr6	89197052	89197550	i12
r3137	chr1	216929926	216930247	i12
r3139	chr1	217027316	217027782	i12
r31468	chr6	113597294	113597487	i12
r31491	chr6	116352492	116352804	i12
r31511	chr6	117143782	117143964	i12
r31563	chr6	119709070	119709344	i12
r31576	chr6	121724965	121725207	i12
r3158	chr1	218345930	218346033	i12
r31711	chr6	131183050	131183341	i12
r31743	chr6	132798317	132798869	i12
r32021	chr6	147194932	147195171	i12
r32143	chr6	152587576	152587700	i12
r32316	chr6	160992082	160992471	i12
r32445	chr6	169768084	169768391	i12
r32535	chr7	2941332	2941538	i12
r32730	chr7	17690180	17690421	i12
r32740	chr7	18225162	18225353	i12
r32814	chr7	22587513	22587663	i12
r32987	chr7	35036838	35036959	i12
r33210	chr7	50340011	50340117	i12
r33220	chr7	50645250	50645555	i12
r33461	chr7	83162558	83163181	i12
r33542	chr7	91013276	91013523	i12
r33566	chr7	92527701	92527912	i12
r33573	chr7	92639510	92639711	i12
r33911	chr7	112159312	112159654	i12
r33995	chr7	120548261	120548488	i12
r34032	chr7	124457803	124458199	i12
r34274	chr7	141015363	141015474	i12
r34626	chr8	11421846	11421978	i12
r34955	chr8	36502932	36503216	i12
r34990	chr8	38386941	38387095	i12
r35074	chr8	43145793	43146103	i12
r3539	chr1	240087054	240087274	i12
r35472	chr8	80864687	80865114	i12
r35510	chr8	86034014	86034388	i12
r35790	chr8	107495114	107495386	i12
r35842	chr8	113740349	113740692	i12
r35895	chr8	117161650	117162021	i12
r35970	chr8	121530423	121530784	i12
r36153	chr8	133060336	133060499	i12
r36248	chr8	142727417	142727709	i12
r36362	chr9	3875119	3875366	i12
r36729	chr9	37036965	37037181	i12
r36838	chr9	70861499	70861796	i12
r36853	chr9	71710338	71710559	i12
r37001	chr9	83006454	83006690	i12
r37077	chr9	88007097	88007547	i12
r37082	chr9	88923767	88923973	i12
r37128	chr9	91162872	91163124	i12
r37149	chr9	92669468	92669734	i12
r37329	chr9	106625393	106625709	i12
r37349	chr9	107589546	107589724	i12
r3748	chr10	5449818	5450040	i12
r38240	chrX	51743327	51743662	i12
r38643	chrX	112840780	112841236	i12
r38861	chrX	136251030	136251169	i12
r38959	chrX	153726336	153726524	i12
r3902	chr10	13440460	13440725	i12
r3907	chr10	13658396	13658551	i12
r3990	chr10	19974157	19974565	i12
r4110	chr10	29486507	29486669	i12
r4353	chr10	50343987	50344210	i12
r4389	chr10	53638212	53638495	i12
r4400	chr10	58267416	58267555	i12
r4434	chr10	60572414	60572718	i12
r4748	chr10	80144436	80144630	i12
r4778	chr10	81057614	81057803	i12
r4831	chr10	87094089	87094335	i12
r5422	chr10	123526780	123526961	i12
r5705	chr11	6225957	6226143	i12
r5831	chr11	10973569	10973911	i12
r6023	chr11	30585805	30586070	i12
r625	chr1	35031189	35031292	i12
r6268	chr11	57335377	57335573	i12
r6933	chr11	101583125	101583613	i12
r7047	chr11	111186591	111186889	i12
r7382	chr11	126293735	126294010	i12
r7394	chr11	126468087	126468703	i12
r7915	chr12	23683976	23684431	i12
r8179	chr12	48940227	48940517	i12
r8264	chr12	52050767	52050912	i12
r8276	chr12	52907851	52908095	i12
r8629	chr12	71780332	71780563	i12
r8697	chr12	78735377	78735764	i12
r8768	chr12	89040280	89040462	i12
r8770	chr12	89155966	89156187	i12
r9139	chr12	109461115	109461412	i12
r9205	chr12	113135706	113136056	i12
r9226	chr12	115960970	115961475	i12
r9286	chr12	120225950	120226220	i12
r9394	chr12	124567040	124567143	i12
r9430	chr12	130953820	130954107	i12
r9528	chr13	23384117	23384483	i12
r9602	chr13	27953728	27954193	i12
r10064	chr13	75481661	75481964	a11
r1013	chr1	58816282	58816673	a11
r10219	chr13	95644516	95644824	a11
r10424	chr13	113153232	113153362	a11
r10547	chr14	23095749	23095882	a11
r10568	chr14	24036830	24036959	a11
r10573	chr14	24081369	24081705	a11
r10707	chr14	36942297	36942496	a11
r10713	chr14	38256020	38256198	a11
r10794	chr14	50560300	50560685	a11
r11112	chr14	69191714	69191849	a11
r11244	chr14	76352915	76353128	a11
r11367	chr14	89430612	89431181	a11
r11419	chr14	92323438	92323664	a11
r11705	chr15	31347372	31347651	a11
r11709	chr15	31365882	31366120	a11
r11838	chr15	40471104	40471375	a11
r11847	chr15	40754542	40754705	a11
r11889	chr15	42581273	42581711	a11
r11891	chr15	42920208	42920340	a11
r12126	chr15	59997227	59997348	a11
r12168	chr15	63381684	63381850	a11
r12183	chr15	63834311	63834432	a11
r12214	chr15	64894739	64894955	a11
r12268	chr15	68631753	68631889	a11
r12415	chr15	76336665	76336786	a11
r12791	chr15	99090500	99090611	a11
r12851	chr16	84964	85085	a11
r12879	chr16	1534077	1534198	a11
r12890	chr16	1971852	1972202	a11
r12940	chr16	3305254	3305775	a11
r13040	chr16	11742323	11742650	a11
r13171	chr16	22190053	22190239	a11
r13260	chr16	28984852	28985041	a11
r13269	chr16	29790418	29790917	a11
r1330	chr1	87045865	87046026	a11
r13336	chr16	31202157	31202431	a11
r13482	chr16	56191519	56191705	a11
r13599	chr16	67014218	67014361	a11
r13670	chr16	69565728	69566338	a11
r13771	chr16	75111100	75111218	a11
r13930	chr16	85027463	85027929	a11
r14002	chr16	88856896	88857200	a11
r14032	chr16	89860945	89861171	a11
r14045	chr17	143991	144102	a11
r14055	chr17	782048	782526	a11
r14072	chr17	1455483	1455965	a11
r14083	chr17	1628401	1628565	a11
r14132	chr17	4498678	4498982	a11
r1414	chr1	91404221	91404757	a11
r14195	chr17	7329347	7329859	a11
r14225	chr17	7843633	7843846	a11
r1428	chr1	92476479	92476590	a11
r14366	chr17	18038902	18039023	a11
r14374	chr17	18260426	18260675	a11
r1450	chr1	93681168	93681315	a11
r14618	chr17	36603086	36603197	a11
r14667	chr17	39623428	39623569	a11
r14670	chr17	39730256	39730696	a11
r14671	chr17	39754134	39754847	a11
r14699	chr17	40443440	40443652	a11
r14736	chr17	42412067	42412201	a11
r14741	chr17	42609138	42609800	a11
r14765	chr17	43368799	43369105	a11
r14771	chr17	43720717	43720965	a11
r14786	chr17	44218554	44218896	a11
r14799	chr17	44774955	44775066	a11
r14810	chr17	45197828	45198143	a11
r14849	chr17	47831450	47831766	a11
r14910	chr17	49968535	49968675	a11
r14995	chr17	57988682	57988811	a11
r15044	chr17	60421285	60421856	a11
r15101	chr17	63998315	63998466	a11
r15246	chr17	73192405	73192788	a11
r15258	chr17	74213908	74214019	a11
r15348	chr17	76481251	76481465	a11
r15366	chr17	77088552	77088856	a11
r15374	chr17	77400684	77400876	a11
r15393	chr17	78252313	78252510	a11
r15400	chr17	78343829	78344078	a11
r15403	chr17	78378494	78378834	a11
r15423	chr17	80101281	80101783	a11
r1552	chr1	101247926	101248135	a11
r15597	chr18	7231695	7231867	a11
r15930	chr18	39841557	39841834	a11
r16036	chr18	49491904	49492023	a11
r16456	chr19	1266561	1266715	a11
r16464	chr19	1508145	1508263	a11
r16465	chr19	1652794	1653274	a11
r16467	chr19	1826115	1826240	a11
r16478	chr19	2085410	2085616	a11
r16487	chr19	2328474	2328701	a11
r16518	chr19	3359006	3359127	a11
r16530	chr19	4067266	4067424	a11
r16618	chr19	8592558	8592765	a11
r16627	chr19	9793143	9793258	a11
r16628	chr19	9827704	9828019	a11
r16636	chr19	10231119	10231337	a11
r16662	chr19	10701364	10701551	a11
r16699	chr19	11887710	11888103	a11
r16718	chr19	12484692	12485031	a11
r16782	chr19	14431986	14432108	a11
r16799	chr19	15432680	15433005	a11
r16814	chr19	16259944	16260154	a11
r16817	chr19	16371553	16371914	a11
r16821	chr19	16542282	16542813	a11
r16841	chr19	17391086	17391320	a11
r16843	chr19	17419744	17420152	a11
r16851	chr19	17605977	17606099	a11
r16856	chr19	17847741	17848130	a11
r16888	chr19	18571540	18571912	a11
r16894	chr19	18701002	18701259	a11
r16900	chr19	19160763	19160884	a11
r17043	chr19	35124583	35124807	a11
r17082	chr19	35959193	35959366	a11
r17087	chr19	36114831	36115881	a11
r17093	chr19	36418380	36418910	a11
r17147	chr19	38618796	38619310	a11
r17154	chr19	38849318	38849601	a11
r17161	chr19	39031374	39031498	a11
r17337	chr19	45439697	45439924	a11
r17353	chr19	45769391	45769733	a11
r17447	chr19	49333903	49334093	a11
r17449	chr19	49443425	49443949	a11
r17488	chr19	50358512	50358623	a11
r17544	chr19	52397689	52397870	a11
r17569	chr19	53537519	53537716	a11
r17612	chr19	55179190	55179594	a11
r17624	chr19	55516927	55517302	a11
r17631	chr19	55675010	55675348	a11
r17638	chr19	56478054	56478222	a11
r17642	chr19	56671654	56671935	a11
r17772	chr2	8457271	8457392	a11
r17792	chr2	9207718	9207829	a11
r17887	chr2	15730594	15730787	a11
r17967	chr2	21043003	21043129	a11
r18005	chr2	25216036	25216259	a11
r18116	chr2	30231099	30231220	a11
r18118	chr2	30231670	30231884	a11
r1822	chr1	118251227	118251395	a11
r18299	chr2	43134185	43134310	a11
r18387	chr2	47521082	47521583	a11
r18628	chr2	65301184	65301426	a11
r1899	chr1	144104444	144104696	a11
r19120	chr2	102619129	102619287	a11
r19219	chr2	112482421	112482539	a11
r19285	chr2	118310500	118310627	a11
r19324	chr2	120735990	120736118	a11
r1935	chr1	147599160	147599294	a11
r19351	chr2	126656368	126656501	a11
r19402	chr2	131522554	131522665	a11
r19463	chr2	136119206	136119412	a11
r19895	chr2	170180333	170180474	a11
r20415	chr2	203706476	203706677	a11
r20614	chr2	217756617	217756796	a11
r20622	chr2	218034063	218034263	a11
r20651	chr2	218880086	218880566	a11
r20669	chr2	219294740	219295107	a11
r20700	chr2	222671611	222671853	a11
r2077	chr1	154221384	154221500	a11
r20822	chr2	230873740	230873883	a11
r20849	chr2	231662073	231662659	a11
r20860	chr2	231925335	231925496	a11
r20934	chr2	236551641	236551808	a11
r2106	chr1	155050543	155050771	a11
r21086	chr20	2652261	2652805	a11
r21096	chr20	3173123	3173384	a11
r21109	chr20	3811714	3811960	a11
r2113	chr1	155091543	155091759	a11
r2122	chr1	155194822	155195013	a11
r21273	chr20	17610658	17610769	a11
r2145	chr1	156053471	156053582	a11
r21479	chr20	33994416	33994561	a11
r21495	chr20	35147092	35147436	a11
r21507	chr20	35741617	35741760	a11
r21523	chr20	36574814	36574951	a11
r21559	chr20	38805553	38805817	a11
r21603	chr20	43657392	43657754	a11
r21646	chr20	45833598	45833768	a11
r21683	chr20	49046596	49046906	a11
r21713	chr20	50795430	50795598	a11
r2172	chr1	156582044	156582219	a11
r21886	chr20	64077908	64078029	a11
r21887	chr20	64120472	64120667	a11
r21890	chr21	5128410	5128576	a11
r21946	chr21	17512787	17513115	a11
r22094	chr21	33479459	33479639	a11
r22183	chr21	39313758	39314005	a11
r22217	chr21	42738145	42738402	a11
r22225	chr21	43346054	43346282	a11
r22300	chr22	18001227	18001354	a11
r22377	chr22	23145343	23145538	a11
r22494	chr22	31662018	31662430	a11
r22584	chr22	38700847	38701233	a11
r22587	chr22	38755935	38756213	a11
r22619	chr22	40819280	40819614	a11
r22620	chr22	40856535	40857290	a11
r22630	chr22	41446740	41447045	a11
r22656	chr22	42519699	42519973	a11
r22672	chr22	43152279	43152482	a11
r22734	chr22	46674457	46674766	a11
r22754	chr22	50030325	50030512	a11
r22801	chr3	4984186	4984425	a11
r23010	chr3	16512470	16512827	a11
r23016	chr3	16897622	16897743	a11
r23430	chr3	45972617	45972861	a11
r23470	chr3	47421056	47421392	a11
r23538	chr3	50260475	50260650	a11
r23716	chr3	59575423	59575544	a11
r23846	chr3	71422041	71422220	a11
r23939	chr3	96813902	96814188	a11
r24137	chr3	111610195	111610426	a11
r24185	chr3	113745574	113745753	a11
r24363	chr3	125766354	125766672	a11
r24410	chr3	128698603	128698862	a11
r24419	chr3	128993954	128994265	a11
r24954	chr3	169662554	169662713	a11
r25179	chr3	185152737	185152963	a11
r25488	chr4	1552494	1552686	a11
r25559	chr4	6938058	6938232	a11
r25579	chr4	8242313	8242439	a11
r25850	chr4	39353818	39354111	a11
r2595	chr1	181089833	181090000	a11
r25987	chr4	53855567	53855748	a11
r26002	chr4	54539741	54539925	a11
r26524	chr4	104491614	104491774	a11
r26905	chr4	140427359	140427873	a11
r27065	chr4	151325262	151325463	a11
r27102	chr4	153345207	153345328	a11
r27523	chr5	1594448	1594638	a11
r27572	chr5	10537671	10537792	a11
r28340	chr5	77844746	77844942	a11
r285	chr1	15584656	15584777	a11
r2876	chr1	203273236	203273655	a11
r28965	chr5	128537507	128537701	a11
r29134	chr5	139392932	139393058	a11
r292	chr1	15835788	15836209	a11
r29479	chr5	157744060	157744232	a11
r29675	chr5	174419336	174419530	a11
r29870	chr6	3157481	3157839	a11
r30059	chr6	13428222	13428468	a11
r30263	chr6	26087343	26087639	a11
r30466	chr6	31729739	31730022	a11
r30536	chr6	33277053	33277520	a11
r30552	chr6	33593158	33593378	a11
r30562	chr6	34235747	34235974	a11
r30663	chr6	40587548	40587885	a11
r30717	chr6	42771095	42771549	a11
r30794	chr6	46011599	46011770	a11
r30804	chr6	46491449	46491700	a11
r3136	chr1	216601043	216601390	a11
r31411	chr6	110179141	110179273	a11
r31694	chr6	130020699	130020822	a11
r32024	chr6	147204242	147204397	a11
r32436	chr6	169396585	169396705	a11
r32527	chr7	2709658	2709957	a11
r32541	chr7	3956500	3956745	a11
r32792	chr7	20895807	20895977	a11
r3287	chr1	225897197	225897469	a11
r32882	chr7	27096357	27096501	a11
r32987	chr7	35036838	35036959	a11
r33157	chr7	45811901	45812070	a11
r33245	chr7	55572767	55572928	a11
r33333	chr7	73624319	73624644	a11
r33505	chr7	87628808	87629009	a11
r33509	chr7	87933854	87934578	a11
r33521	chr7	88759359	88759470	a11
r33738	chr7	100966299	100966514	a11
r33758	chr7	101815618	101815729	a11
r33824	chr7	105387844	105388328	a11
r34081	chr7	128935045	128935156	a11
r34230	chr7	138752560	138752799	a11
r34257	chr7	140231474	140231596	a11
r3427	chr1	232950308	232950806	a11
r34463	chr7	156156036	156156170	a11
r34481	chr7	157568952	157569107	a11
r34531	chr8	5852309	5852426	a11
r34574	chr8	8737025	8737171	a11
r34678	chr8	17026915	17027127	a11
r34884	chr8	28338541	28338652	a11
r34888	chr8	28411882	28412288	a11
r34993	chr8	38468189	38468339	a11
r35037	chr8	41653746	41654104	a11
r35086	chr8	47198284	47198467	a11
r35428	chr8	78515896	78516648	a11
r35717	chr8	102412043	102412466	a11
r35830	chr8	109644669	109645159	a11
r3617	chr1	246395734	246395873	a11
r36191	chr8	138936224	138936427	a11
r36259	chr8	143335015	143335196	a11
r36462	chr9	15135234	15135485	a11
r36729	chr9	37036965	37037181	a11
r36794	chr9	68705008	68705458	a11
r37082	chr9	88923767	88923973	a11
r37150	chr9	92716619	92716855	a11
r37227	chr9	98315681	98315951	a11
r37343	chr9	107465637	107465840	a11
r37344	chr9	107465956	107466093	a11
r37487	chr9	116549388	116549578	a11
r37666	chr9	130579721	130579881	a11
r37677	chr9	131503114	131503406	a11
r37679	chr9	131531140	131531308	a11
r37687	chr9	131668809	131668970	a11
r3776	chr10	6348123	6348491	a11
r38001	chrX	20265433	20265561	a11
r38238	chrX	51395997	51396118	a11
r38489	chrX	86148248	86148509	a11
r38748	chrX	129843555	129843761	a11
r38860	chrX	136250871	136250986	a11
r3946	chr10	16663642	16663818	a11
r396	chr1	23343692	23343954	a11
r3969	chr10	17453417	17453658	a11
r3983	chr10	19629184	19629361	a11
r4233	chr10	41912441	41912575	a11
r4271	chr10	43689684	43689895	a11
r4325	chr10	48671570	48671825	a11
r4326	chr10	48671969	48672109	a11
r4368	chr10	51074593	51074848	a11
r437	chr1	25338248	25338719	a11
r445	chr1	25875305	25875735	a11
r4470	chr10	62080353	62080516	a11
r4596	chr10	70888219	70888533	a11
r461	chr1	26289854	26290143	a11
r492	chr1	27234219	27234871	a11
r4964	chr10	95656230	95656957	a11
r5350	chr10	118832237	118832404	a11
r5365	chr10	119502458	119502582	a11
r5443	chr10	124530112	124530409	a11
r5553	chr10	132331758	132332356	a11
r5571	chr10	133261408	133261566	a11
r5601	chr11	728115	728226	a11
r5624	chr11	1832584	1832695	a11
r57	chr1	2391482	2391980	a11
r5807	chr11	10450572	10450765	a11
r5808	chr11	10451018	10451275	a11
r5815	chr11	10540679	10541428	a11
r5898	chr11	15114425	15114546	a11
r5931	chr11	17504033	17504186	a11
r5959	chr11	18721663	18721823	a11
r6023	chr11	30585805	30586070	a11
r6037	chr11	32333367	32333806	a11
r6185	chr11	45899804	45899977	a11
r6332	chr11	61129771	61130033	a11
r6398	chr11	63670856	63671084	a11
r6415	chr11	64230302	64230837	a11
r6423	chr11	64317952	64318399	a11
r6432	chr11	64723152	64723351	a11
r6463	chr11	65334104	65334252	a11
r6475	chr11	65552064	65552291	a11
r6489	chr11	65818204	65818443	a11
r6512	chr11	66371618	66372002	a11
r6514	chr11	66408962	66409076	a11
r6541	chr11	67403857	67403980	a11
r6563	chr11	68843987	68844181	a11
r6564	chr11	68903776	68904114	a11
r6575	chr11	69675069	69675564	a11
r6655	chr11	74988646	74989149	a11
r67	chr1	2642473	2642774	a11
r6911	chr11	96341774	96341895	a11
r7041	chr11	110712810	110713013	a11
r7119	chr11	115504375	115504724	a11
r7369	chr11	125569679	125569910	a11
r7428	chr11	128624315	128624470	a11
r7576	chr12	4142846	4143222	a11
r759	chr1	41241348	41241561	a11
r7698	chr12	8698488	8698606	a11
r7735	chr12	10723260	10723591	a11
r7766	chr12	12475084	12475301	a11
r81	chr1	3624322	3624502	a11
r8218	chr12	49827831	49827952	a11
r8244	chr12	51324017	51324310	a11
r827	chr1	44843159	44843393	a11
r8314	chr12	54217029	54217166	a11
r8870	chr12	93570964	93571359	a11
r92	chr1	4027669	4027847	a11
r9239	chr12	116444006	116444117	a11
r9330	chr12	121773332	121773504	a11
r9442	chr12	132237173	132237294	a11
r9515	chr13	21670827	21671164	a11
r9542	chr13	24224069	24224229	a11
r9583	chr13	26930334	26930590	a11
r9786	chr13	42272297	42272448	a11
r9922	chr13	50594487	50594761	a11
r10123	chr13	79227557	79227690	a12
r10229	chr13	97028798	97028920	a12
r10247	chr13	97460089	97460261	a12
r1025	chr1	59560977	59561133	a12
r10255	chr13	98411811	98411926	a12
r10388	chr13	110531818	110531978	a12
r10409	chr13	111304136	111304362	a12
r10513	chr14	22570241	22570719	a12
r10537	chr14	22996386	22996489	a12
r10544	chr14	23078822	23078925	a12
r10550	chr14	23161328	23161460	a12
r10563	chr14	23572804	23573122	a12
r10630	chr14	29858423	29858528	a12
r10669	chr14	34013374	34013697	a12
r10690	chr14	35375792	35375954	a12
r10710	chr14	37232940	37233156	a12
r10748	chr14	45089990	45090093	a12
r10755	chr14	46769317	46769603	a12
r1081	chr1	63893094	63893336	a12
r10811	chr14	51139224	51139574	a12
r10828	chr14	52175958	52176246	a12
r10857	chr14	54627606	54627783	a12
r10859	chr14	54650520	54650654	a12
r10927	chr14	58749375	58749528	a12
r10928	chr14	58752907	58753161	a12
r1094	chr1	64933276	64933559	a12
r10964	chr14	61103759	61103983	a12
r10985	chr14	61662548	61662898	a12
r10994	chr14	63436013	63436116	a12
r11007	chr14	63933161	63933460	a12
r11037	chr14	65156829	65156954	a12
r11083	chr14	68210815	68211332	a12
r11096	chr14	68578011	68578114	a12
r11114	chr14	69354493	69354685	a12
r11137	chr14	70803492	70803597	a12
r11217	chr14	75247704	75247899	a12
r11235	chr14	75654246	75654373	a12
r11252	chr14	76864150	76864356	a12
r1126	chr1	66350136	66350440	a12
r11407	chr14	91316021	91316193	a12
r11432	chr14	92775411	92775644	a12
r11466	chr14	95185527	95185700	a12
r11467	chr14	95265569	95265765	a12
r11468	chr14	95313898	95314094	a12
r11560	chr14	102869240	102869368	a12
r11776	chr15	36810886	36810991	a12
r11868	chr15	41696104	41696297	a12
r11882	chr15	42279544	42279649	a12
r11999	chr15	50885413	50885578	a12
r1200	chr1	72281315	72281420	a12
r12021	chr15	51981635	51981769	a12
r12050	chr15	55031846	55031991	a12
r1207	chr1	74811473	74811835	a12
r12080	chr15	57337928	57338078	a12
r12081	chr15	57395311	57395579	a12
r124	chr1	6475662	6475860	a12
r1246	chr1	78061313	78061476	a12
r12566	chr15	85545347	85545486	a12
r12602	chr15	89105136	89105252	a12
r12641	chr15	90158216	90158417	a12
r1271	chr1	82923854	82924015	a12
r1273	chr1	83508474	83508658	a12
r13081	chr16	15607903	15608098	a12
r1322	chr1	86429915	86430244	a12
r13223	chr16	27326943	27327130	a12
r13231	chr16	27470730	27471269	a12
r13257	chr16	28945617	28945822	a12
r1327	chr1	86774337	86774645	a12
r13356	chr16	34571962	34572107	a12
r13357	chr16	34574183	34574365	a12
r13358	chr16	34581202	34581835	a12
r13360	chr16	34583600	34583769	a12
r13435	chr16	51569700	51569803	a12
r13438	chr16	53022440	53022678	a12
r13462	chr16	54193712	54193817	a12
r13517	chr16	57167026	57167142	a12
r13574	chr16	66408637	66408754	a12
r13695	chr16	70785022	70785193	a12
r13765	chr16	74903821	74903934	a12
r13834	chr16	79440029	79440138	a12
r140	chr1	6962569	6962698	a12
r14048	chr17	331594	331761	a12
r14098	chr17	2266227	2266330	a12
r1419	chr1	91683039	91683154	a12
r1420	chr1	91804750	91804916	a12
r14274	chr17	9880642	9880758	a12
r14321	chr17	15257445	15257588	a12
r14326	chr17	15651694	15652048	a12
r14436	chr17	27239183	27239321	a12
r14437	chr17	27244940	27245202	a12
r14504	chr17	30104616	30105012	a12
r1452	chr1	93707999	93708137	a12
r14553	chr17	33964511	33964713	a12
r14565	chr17	34503901	34504097	a12
r14682	chr17	40096045	40096434	a12
r14806	chr17	45147789	45147913	a12
r15062	chr17	61904442	61904547	a12
r15070	chr17	62611772	62612056	a12
r15119	chr17	64456376	64456489	a12
r15168	chr17	67390852	67390957	a12
r15358	chr17	76579410	76579513	a12
r15376	chr17	77460167	77460326	a12
r15410	chr17	78748826	78749035	a12
r15520	chr18	1303786	1303889	a12
r15537	chr18	2960229	2960513	a12
r15550	chr18	3478710	3478813	a12
r15580	chr18	5466329	5466542	a12
r15586	chr18	5575004	5575107	a12
r15684	chr18	11857425	11857741	a12
r15737	chr18	13893584	13893691	a12
r15789	chr18	24004111	24004335	a12
r1582	chr1	107524479	107524597	a12
r15853	chr18	31736757	31736928	a12
r15864	chr18	32258661	32258764	a12
r15867	chr18	32714379	32714484	a12
r15984	chr18	46052077	46052290	a12
r16106	chr18	55997285	55997425	a12
r16139	chr18	57649883	57649988	a12
r16140	chr18	57666927	57667100	a12
r16146	chr18	58015167	58015358	a12
r16221	chr18	62436735	62436984	a12
r16360	chr18	76565890	76566059	a12
r16387	chr18	77140871	77140989	a12
r16397	chr18	79210100	79210302	a12
r16509	chr19	2951072	2951201	a12
r16580	chr19	7183356	7183515	a12
r16608	chr19	8362144	8362249	a12
r16692	chr19	11694912	11695126	a12
r16753	chr19	13104415	13104738	a12
r16849	chr19	17523146	17523628	a12
r16885	chr19	18496289	18496399	a12
r17041	chr19	35067243	35067346	a12
r17402	chr19	48333814	48334212	a12
r17435	chr19	49017767	49017886	a12
r1750	chr1	114126817	114127043	a12
r17520	chr19	51607122	51607227	a12
r17819	chr2	10400543	10400683	a12
r17858	chr2	12169093	12169298	a12
r17888	chr2	15732323	15732497	a12
r17895	chr2	16653813	16654080	a12
r17899	chr2	16729353	16729456	a12
r17911	chr2	17643298	17643430	a12
r17959	chr2	20618027	20618399	a12
r17960	chr2	20618531	20618634	a12
r17965	chr2	20699096	20699292	a12
r18012	chr2	25295006	25295113	a12
r18068	chr2	27703874	27703984	a12
r18070	chr2	27771587	27771800	a12
r18157	chr2	32265657	32265869	a12
r18236	chr2	38997869	38998031	a12
r18269	chr2	41476060	41476315	a12
r1827	chr1	119323778	119323968	a12
r18312	chr2	43269107	43269229	a12
r18357	chr2	46547515	46547625	a12
r18369	chr2	46985151	46985280	a12
r1837	chr1	120142985	120143211	a12
r18407	chr2	48265736	48265881	a12
r18448	chr2	54048776	54048927	a12
r18493	chr2	57720935	57721116	a12
r18567	chr2	62406609	62407151	a12
r18619	chr2	64938015	64938189	a12
r1865	chr1	124158957	124159092	a12
r1868	chr1	124302189	124302314	a12
r1872	chr1	125181324	125181427	a12
r1874	chr1	125183116	125183219	a12
r1876	chr1	143195460	143195563	a12
r18769	chr2	73877470	73877725	a12
r1879	chr1	143216209	143216312	a12
r18809	chr2	74602877	74603188	a12
r1881	chr1	143238419	143238550	a12
r1883	chr1	143246885	143247170	a12
r1885	chr1	143263382	143263516	a12
r18956	chr2	89851385	89851488	a12
r19044	chr2	98508808	98508913	a12
r19048	chr2	98749083	98749479	a12
r19077	chr2	100854194	100854468	a12
r19093	chr2	101972962	101973196	a12
r19137	chr2	105141301	105141404	a12
r19296	chr2	119284042	119284321	a12
r19320	chr2	120339123	120339228	a12
r19365	chr2	127505383	127505707	a12
r19420	chr2	133886797	133886939	a12
r19456	chr2	135840684	135840961	a12
r19462	chr2	136019352	136019657	a12
r19646	chr2	152499874	152500156	a12
r19659	chr2	155702674	155702832	a12
r19665	chr2	156405681	156405898	a12
r19715	chr2	159101859	159101964	a12
r19770	chr2	161605045	161605150	a12
r19943	chr2	172836365	172836653	a12
r20026	chr2	177383977	177384214	a12
r20056	chr2	178530623	178530972	a12
r20057	chr2	178531253	178531427	a12
r20160	chr2	188655152	188655282	a12
r20170	chr2	189581096	189581216	a12
r20197	chr2	190678954	190679057	a12
r20211	chr2	191114536	191114855	a12
r20256	chr2	194102671	194102803	a12
r20279	chr2	196233048	196233286	a12
r20351	chr2	200348097	200348233	a12
r20352	chr2	200374204	200374415	a12
r20362	chr2	200635326	200635431	a12
r20396	chr2	202609800	202610000	a12
r20416	chr2	203741083	203741304	a12
r20463	chr2	206713862	206714068	a12
r20469	chr2	207073888	207073993	a12
r20509	chr2	208182840	208183234	a12
r20595	chr2	216206061	216206308	a12
r20611	chr2	217653542	217653645	a12
r20638	chr2	218382229	218382402	a12
r20709	chr2	222912128	222912568	a12
r20757	chr2	225494226	225494393	a12
r208	chr1	10251824	10252012	a12
r20807	chr2	230225485	230225865	a12
r20881	chr2	233202665	233202899	a12
r20932	chr2	236545268	236545411	a12
r21082	chr20	2211173	2211367	a12
r21204	chr20	10596896	10597044	a12
r21254	chr20	16491545	16491809	a12
r21257	chr20	16552215	16552320	a12
r21317	chr20	20303802	20303905	a12
r21368	chr20	23152469	23152665	a12
r21409	chr20	25309905	25310087	a12
r21422	chr20	29262660	29262885	a12
r21439	chr20	31666706	31666886	a12
r21443	chr20	31696361	31696493	a12
r2154	chr1	156148410	156148518	a12
r21548	chr20	38152450	38152589	a12
r21549	chr20	38152681	38152938	a12
r21566	chr20	39358149	39358562	a12
r21619	chr20	44586360	44586655	a12
r2167	chr1	156492699	156492875	a12
r21787	chr20	57432972	57433237	a12
r21916	chr21	14864389	14864562	a12
r21930	chr21	15222017	15222330	a12
r21970	chr21	24423088	24423210	a12
r22205	chr21	42081324	42081465	a12
r22373	chr22	22901799	22901958	a12
r22378	chr22	23174039	23174185	a12
r22463	chr22	30270954	30271146	a12
r22514	chr22	35377100	35377318	a12
r22653	chr22	42376839	42377065	a12
r22654	chr22	42419611	42419718	a12
r22707	chr22	45743004	45743168	a12
r22736	chr22	46739247	46739473	a12
r22741	chr22	46935851	46936027	a12
r22762	chr22	50469892	50470193	a12
r22775	chr3	291085	291334	a12
r22812	chr3	5139626	5139955	a12
r22882	chr3	10220800	10220996	a12
r22885	chr3	10249382	10249540	a12
r22999	chr3	16286267	16286420	a12
r23053	chr3	20054633	20055079	a12
r23059	chr3	20813643	20813776	a12
r23088	chr3	23857493	23857802	a12
r23093	chr3	24220982	24221087	a12
r23480	chr3	48268506	48268646	a12
r23509	chr3	49248845	49249093	a12
r2361	chr1	167563590	167563863	a12
r23696	chr3	58335333	58335453	a12
r23708	chr3	58998599	58998735	a12
r23743	chr3	63480928	63481099	a12
r23755	chr3	64399416	64399604	a12
r23758	chr3	64505500	64505638	a12
r23834	chr3	71102435	71102554	a12
r23840	chr3	71220354	71220470	a12
r23858	chr3	71978189	71978333	a12
r23885	chr3	76321772	76321940	a12
r24031	chr3	102130386	102130508	a12
r24041	chr3	104596705	104596809	a12
r24092	chr3	107911079	107911262	a12
r24121	chr3	108669631	108669781	a12
r24148	chr3	112111869	112112135	a12
r24180	chr3	113614628	113614773	a12
r24225	chr3	116809229	116809504	a12
r24268	chr3	120408125	120408244	a12
r24276	chr3	120678390	120678686	a12
r24278	chr3	120688212	120688408	a12
r24393	chr3	127736320	127736423	a12
r24404	chr3	128316524	128316659	a12
r24435	chr3	129485978	129486106	a12
r24438	chr3	129576850	129577116	a12
r24500	chr3	133396360	133396529	a12
r24517	chr3	134057945	134058097	a12
r24574	chr3	138382070	138382264	a12
r24590	chr3	139434832	139434980	a12
r24812	chr3	156060091	156060202	a12
r24884	chr3	160413712	160413914	a12
r24911	chr3	165206837	165207069	a12
r24999	chr3	171967175	171967398	a12
r25023	chr3	172643931	172644157	a12
r25039	chr3	175486314	175486593	a12
r25080	chr3	178969177	178969315	a12
r25110	chr3	182092657	182092889	a12
r25232	chr3	187041886	187042030	a12
r25258	chr3	187999940	188000112	a12
r25286	chr3	188656711	188656814	a12
r25293	chr3	188914789	188914933	a12
r25306	chr3	189393699	189393843	a12
r25353	chr3	192699769	192699923	a12
r25368	chr3	193461756	193461920	a12
r25385	chr3	194089461	194089918	a12
r25448	chr3	197023353	197023491	a12
r25552	chr4	6807461	6807600	a12
r25562	chr4	6942236	6942557	a12
r25586	chr4	8819666	8819807	a12
r25599	chr4	10023824	10024072	a12
r25631	chr4	13656667	13656772	a12
r2568	chr1	180080525	180080668	a12
r25713	chr4	22389375	22389567	a12
r25754	chr4	25938917	25939117	a12
r25764	chr4	26142021	26142245	a12
r25828	chr4	38132335	38132526	a12
r25830	chr4	38174882	38175045	a12
r25881	chr4	40763331	40763570	a12
r25884	chr4	40887769	40887923	a12
r26018	chr4	55920481	55920586	a12
r26057	chr4	58560711	58561156	a12
r26091	chr4	69910522	69910672	a12
r2612	chr1	182144302	182144510	a12
r26206	chr4	77586941	77587277	a12
r26213	chr4	78129523	78129626	a12
r26293	chr4	83320644	83320877	a12
r26303	chr4	84317637	84317803	a12
r26343	chr4	86957308	86957511	a12
r26406	chr4	91756980	91757083	a12
r265	chr1	13703016	13703127	a12
r26618	chr4	110519047	110519152	a12
r26656	chr4	113468217	113468722	a12
r26725	chr4	121256476	121256677	a12
r26807	chr4	128454335	128454493	a12
r26833	chr4	138114557	138114786	a12
r26913	chr4	140829969	140830079	a12
r27020	chr4	147118730	147118852	a12
r27122	chr4	153656111	153656216	a12
r27214	chr4	163280970	163281095	a12
r27228	chr4	163622058	163622210	a12
r27308	chr4	171880611	171880753	a12
r27322	chr4	173415299	173415402	a12
r27363	chr4	177108580	177108685	a12
r27425	chr4	184345712	184345821	a12
r27483	chr4	189489160	189489265	a12
r27515	chr5	1477405	1477657	a12
r27517	chr5	1502067	1502320	a12
r27520	chr5	1517946	1518074	a12
r27531	chr5	2443009	2443112	a12
r2763	chr1	197481146	197481367	a12
r27641	chr5	16455808	16456007	a12
r27675	chr5	21701374	21701541	a12
r27722	chr5	32532144	32532346	a12
r27742	chr5	33701295	33701400	a12
r27777	chr5	36680133	36680267	a12
r27876	chr5	41277949	41278095	a12
r27932	chr5	46952794	46952954	a12
r27934	chr5	49600472	49600622	a12
r27936	chr5	50036362	50036513	a12
r27963	chr5	52725492	52725661	a12
r27971	chr5	53422706	53422840	a12
r28018	chr5	55636829	55637008	a12
r28028	chr5	56159717	56159829	a12
r28034	chr5	56481557	56481693	a12
r28088	chr5	59799538	59799715	a12
r28096	chr5	60207140	60207386	a12
r28124	chr5	61319489	61319715	a12
r28137	chr5	61665984	61666087	a12
r28153	chr5	62690169	62690317	a12
r28459	chr5	88761416	88761568	a12
r28503	chr5	90871440	90871603	a12
r28504	chr5	90871657	90871945	a12
r28586	chr5	96638811	96638956	a12
r28602	chr5	97049221	97049493	a12
r28747	chr5	112147044	112147195	a12
r28767	chr5	113194798	113194964	a12
r28799	chr5	115475856	115476048	a12
r28873	chr5	122723566	122723931	a12
r28879	chr5	122916239	122916344	a12
r28914	chr5	124858734	124859323	a12
r28934	chr5	126503724	126503999	a12
r28949	chr5	127040834	127041031	a12
r29012	chr5	132456469	132456583	a12
r29095	chr5	136031294	136031401	a12
r29098	chr5	136358022	136358148	a12
r29121	chr5	138369309	138369471	a12
r29222	chr5	142053587	142053752	a12
r29226	chr5	142185154	142185272	a12
r2925	chr1	205504436	205504573	a12
r29265	chr5	143605791	143605971	a12
r29271	chr5	144142417	144142574	a12
r29289	chr5	145976836	145976951	a12
r29318	chr5	147590741	147591071	a12
r29352	chr5	149215819	149216076	a12
r2939	chr1	206030770	206030959	a12
r29396	chr5	151059079	151059253	a12
r29408	chr5	151483178	151483428	a12
r29424	chr5	152514963	152515066	a12
r29523	chr5	160630216	160630321	a12
r29616	chr5	171418666	171418919	a12
r29645	chr5	172887128	172887263	a12
r2965	chr1	206739535	206739839	a12
r29665	chr5	173782185	173782381	a12
r29706	chr5	177071783	177072049	a12
r29787	chr5	180820921	180821233	a12
r2986	chr1	207822764	207822899	a12
r29875	chr6	3324524	3324737	a12
r2994	chr1	207890503	207890712	a12
r30127	chr6	16769176	16769383	a12
r3014	chr1	209411569	209411850	a12
r30176	chr6	20877407	20877906	a12
r30408	chr6	30496603	30496937	a12
r30490	chr6	32439685	32440034	a12
r30558	chr6	33840135	33840322	a12
r30588	chr6	35494082	35494232	a12
r30629	chr6	37516595	37516823	a12
r30676	chr6	41272020	41272303	a12
r30681	chr6	41531983	41532112	a12
r30707	chr6	42395059	42395252	a12
r30785	chr6	45445863	45446040	a12
r30825	chr6	47247519	47247738	a12
r30847	chr6	51996429	51996666	a12
r30879	chr6	52938573	52938722	a12
r30890	chr6	53432712	53432983	a12
r31025	chr6	72977192	72977408	a12
r31119	chr6	83055565	83055684	a12
r31125	chr6	83505494	83505674	a12
r31137	chr6	84050562	84050753	a12
r31273	chr6	97460507	97460704	a12
r3134	chr1	216006006	216006159	a12
r31376	chr6	107811904	107812019	a12
r31386	chr6	108348770	108348959	a12
r31433	chr6	111575612	111575793	a12
r31446	chr6	111845072	111845197	a12
r3150	chr1	217673292	217673700	a12
r31523	chr6	117955791	117955926	a12
r31602	chr6	122790831	122791133	a12
r31717	chr6	131660371	131660484	a12
r31730	chr6	132279649	132280006	a12
r31939	chr6	142784396	142784673	a12
r31948	chr6	142913362	142913824	a12
r31952	chr6	143027194	143027299	a12
r31961	chr6	143567013	143567235	a12
r32034	chr6	148520332	148520519	a12
r32039	chr6	148624026	148624205	a12
r32111	chr6	151040951	151041145	a12
r32131	chr6	151822422	151822781	a12
r32192	chr6	155224137	155224320	a12
r32215	chr6	156963834	156964201	a12
r32225	chr6	157527515	157527641	a12
r32249	chr6	158514671	158514795	a12
r32269	chr6	158938840	158939039	a12
r32325	chr6	161229292	161229409	a12
r32385	chr6	166488158	166488397	a12
r32396	chr6	166950417	166950643	a12
r3243	chr1	222817682	222817804	a12
r32451	chr6	169990163	169990445	a12
r3248	chr1	223556967	223557086	a12
r3268	chr1	224378879	224379143	a12
r32696	chr7	16606800	16607009	a12
r32761	chr7	18866723	18866905	a12
r3284	chr1	225879063	225879264	a12
r32847	chr7	24878046	24878265	a12
r32868	chr7	26291701	26291825	a12
r32893	chr7	27901088	27901352	a12
r32907	chr7	29033703	29033908	a12
r32932	chr7	30237364	30237657	a12
r33008	chr7	36207986	36208250	a12
r33044	chr7	37832361	37832503	a12
r33173	chr7	47941593	47941746	a12
r33223	chr7	51086439	51086596	a12
r33281	chr7	66148640	66148746	a12
r33287	chr7	66642354	66642475	a12
r33314	chr7	70736620	70736826	a12
r33320	chr7	72403787	72403970	a12
r33453	chr7	81810620	81811069	a12
r33499	chr7	87427318	87427548	a12
r3360	chr1	229024675	229024972	a12
r33680	chr7	99380869	99381234	a12
r33681	chr7	99393068	99393376	a12
r33779	chr7	102431922	102432038	a12
r3379	chr1	230154109	230154221	a12
r3382	chr1	230212460	230212593	a12
r33830	chr7	105691154	105691259	a12
r33916	chr7	112462395	112462639	a12
r33944	chr7	115060497	115060753	a12
r33975	chr7	117139093	117139196	a12
r34031	chr7	123784308	123784470	a12
r34267	chr7	140494971	140495112	a12
r34323	chr7	143085269	143085374	a12
r34517	chr8	1755388	1756009	a12
r34566	chr8	8310619	8310722	a12
r34576	chr8	8753067	8753366	a12
r34588	chr8	9324726	9324831	a12
r34631	chr8	11492083	11492266	a12
r34661	chr8	13041473	13041578	a12
r34863	chr8	27351893	27352139	a12
r34910	chr8	29637630	29637789	a12
r34931	chr8	32275074	32275184	a12
r35064	chr8	42346960	42347086	a12
r3507	chr1	236206622	236206893	a12
r35100	chr8	47610351	47610498	a12
r35105	chr8	47899944	47900165	a12
r35115	chr8	48949598	48949822	a12
r35151	chr8	53844409	53844514	a12
r35316	chr8	66540103	66540292	a12
r35348	chr8	69834965	69835139	a12
r35355	chr8	70172769	70172966	a12
r35365	chr8	71230409	71230512	a12
r35415	chr8	76410147	76410250	a12
r35487	chr8	81364564	81364895	a12
r35526	chr8	87918103	87918290	a12
r35560	chr8	92668612	92668786	a12
r35619	chr8	96164435	96164583	a12
r3564	chr1	242711463	242711613	a12
r35758	chr8	104440970	104441171	a12
r35805	chr8	108294508	108294614	a12
r35806	chr8	108337378	108337483	a12
r35851	chr8	115100578	115100904	a12
r35920	chr8	118328974	118329268	a12
r3599	chr1	244409719	244409969	a12
r36029	chr8	124772271	124772418	a12
r36053	chr8	125601988	125602289	a12
r36092	chr8	128973445	128973577	a12
r36098	chr8	129489395	129489510	a12
r36155	chr8	133076327	133076528	a12
r36157	chr8	133081701	133081870	a12
r36173	chr8	134034038	134034200	a12
r36194	chr8	139170655	139170758	a12
r3624	chr1	246609024	246609256	a12
r36353	chr9	3361139	3361244	a12
r36414	chr9	6566525	6566735	a12
r3642	chr1	247347679	247347816	a12
r36431	chr9	7368606	7368878	a12
r3646	chr1	247457177	247457371	a12
r36501	chr9	17415170	17415300	a12
r36543	chr9	21028562	21028722	a12
r36606	chr9	26980282	26980403	a12
r36657	chr9	33159181	33159484	a12
r36667	chr9	33447989	33448102	a12
r36814	chr9	69822378	69822600	a12
r36849	chr9	71638745	71639041	a12
r36887	chr9	72978165	72978319	a12
r36903	chr9	74557690	74557853	a12
r37007	chr9	83433281	83433414	a12
r37071	chr9	87713476	87713885	a12
r37095	chr9	89464053	89464188	a12
r37100	chr9	89624151	89624314	a12
r37158	chr9	93116102	93116205	a12
r37248	chr9	99356754	99356927	a12
r37375	chr9	110051157	110051315	a12
r37383	chr9	110153056	110153169	a12
r37404	chr9	111958101	111958314	a12
r37405	chr9	111959698	111959883	a12
r37409	chr9	112059286	112059440	a12
r3745	chr10	5025603	5025813	a12
r3746	chr10	5284445	5284624	a12
r37489	chr9	116695652	116695822	a12
r37504	chr9	120653074	120653212	a12
r37512	chr9	120935410	120935603	a12
r37534	chr9	122223008	122223137	a12
r37936	chrX	14946742	14946847	a12
r3796	chr10	7186774	7186938	a12
r37987	chrX	19566563	19566920	a12
r38116	chrX	41381867	41381997	a12
r38123	chrX	41706063	41706326	a12
r3848	chr10	11192443	11192564	a12
r38510	chrX	100650116	100650248	a12
r38632	chrX	111041336	111041441	a12
r38835	chrX	134641451	134641639	a12
r38852	chrX	135489693	135489796	a12
r38971	chrX	153981823	153981959	a12
r38990	chrX	154799340	154799451	a12
r393	chr1	22653167	22653272	a12
r3979	chr10	17961633	17961761	a12
r4023	chr10	22630554	22630970	a12
r4058	chr10	25821031	25821134	a12
r4071	chr10	26556141	26556301	a12
r4114	chr10	29563769	29563919	a12
r4130	chr10	30427322	30427514	a12
r4178	chr10	33139227	33139421	a12
r4221	chr10	38355973	38356262	a12
r4235	chr10	42073639	42073748	a12
r4236	chr10	42073833	42074007	a12
r4240	chr10	42083675	42083814	a12
r4242	chr10	42367935	42368158	a12
r433	chr1	25101505	25101756	a12
r4377	chr10	52463906	52464037	a12
r441	chr1	25642790	25642980	a12
r4458	chr10	61903744	61903847	a12
r4577	chr10	69573459	69573613	a12
r4693	chr10	76303879	76304025	a12
r4699	chr10	77024940	77025045	a12
r4724	chr10	79155521	79155684	a12
r4960	chr10	95295208	95295466	a12
r4977	chr10	96271391	96271753	a12
r5180	chr10	105797378	105797481	a12
r5184	chr10	106625074	106625188	a12
r5205	chr10	108359006	108359192	a12
r5268	chr10	112844906	112845040	a12
r5284	chr10	113554337	113554454	a12
r5355	chr10	119271493	119271634	a12
r5385	chr10	119976538	119976711	a12
r5402	chr10	122328784	122328937	a12
r5432	chr10	124124329	124124489	a12
r5434	chr10	124145232	124145474	a12
r5437	chr10	124341156	124341389	a12
r5454	chr10	124687173	124687369	a12
r5463	chr10	124733375	124733478	a12
r5494	chr10	127054006	127054235	a12
r5501	chr10	127878572	127878700	a12
r5512	chr10	128050948	128051051	a12
r5544	chr10	131981369	131981530	a12
r5575	chr10	133293879	133294045	a12
r5587	chr11	327059	327463	a12
r5615	chr11	914973	915078	a12
r5758	chr11	8206857	8207013	a12
r5781	chr11	9601131	9601236	a12
r5817	chr11	10606658	10606764	a12
r5827	chr11	10900442	10900589	a12
r5890	chr11	14765212	14765442	a12
r5899	chr11	15145631	15145880	a12
r5963	chr11	18768561	18768806	a12
r6064	chr11	34244197	34244395	a12
r6085	chr11	35047376	35047536	a12
r6263	chr11	57072777	57072899	a12
r6336	chr11	61336349	61336458	a12
r6342	chr11	61688902	61689143	a12
r6396	chr11	63537045	63537241	a12
r6650	chr11	74462176	74462283	a12
r6659	chr11	75181659	75181907	a12
r6673	chr11	75639855	75640109	a12
r6723	chr11	78828776	78828939	a12
r6726	chr11	79304930	79305036	a12
r6739	chr11	82059342	82059460	a12
r6772	chr11	85948030	85948178	a12
r6798	chr11	86743467	86743609	a12
r6800	chr11	86818607	86818728	a12
r6812	chr11	88294146	88294298	a12
r688	chr1	38475343	38475544	a12
r699	chr1	39192188	39192448	a12
r7028	chr11	109707498	109707666	a12
r7089	chr11	112588283	112588420	a12
r7111	chr11	114159984	114160391	a12
r7154	chr11	117519196	117519322	a12
r7165	chr11	118088545	118088819	a12
r7223	chr11	119618307	119618464	a12
r7309	chr11	123590680	123590875	a12
r7502	chr11	133947403	133947532	a12
r7808	chr12	13611349	13611522	a12
r7858	chr12	15788763	15788887	a12
r7875	chr12	19967589	19967834	a12
r7946	chr12	25615180	25615337	a12
r8021	chr12	32485824	32486014	a12
r8031	chr12	32877811	32878004	a12
r807	chr1	44217775	44217948	a12
r8089	chr12	43795879	43796043	a12
r8091	chr12	43957884	43958082	a12
r8486	chr12	63021191	63021515	a12
r8514	chr12	64800647	64800875	a12
r8522	chr12	65450777	65450955	a12
r8548	chr12	66662285	66662488	a12
r8550	chr12	66901227	66901405	a12
r8579	chr12	68406293	68406414	a12
r8602	chr12	69534509	69534748	a12
r8669	chr12	76192449	76192733	a12
r8795	chr12	89493786	89493975	a12
r8811	chr12	89935968	89936173	a12
r8830	chr12	91778575	91778782	a12
r8831	chr12	91778963	91779247	a12
r8839	chr12	92071203	92071362	a12
r8902	chr12	94689325	94689535	a12
r8953	chr12	98424800	98425099	a12
r8970	chr12	99049917	99050076	a12
r8977	chr12	100185396	100185694	a12
r8992	chr12	101491473	101491674	a12
r9274	chr12	119375726	119375870	a12
r9279	chr12	119836796	119837141	a12
r9307	chr12	120944684	120944829	a12
r9340	chr12	121992226	121992419	a12
r9361	chr12	123043540	123043715	a12
r9399	chr12	124626307	124626502	a12
r9417	chr12	125346351	125346634	a12
r9425	chr12	128807467	128807641	a12
r9453	chr12	132598815	132598955	a12
r9468	chr13	16252681	16252796	a12
r9499	chr13	20495226	20495408	a12
r9545	chr13	24254190	24254530	a12
r9589	chr13	27353293	27353458	a12
r9616	chr13	28531102	28531289	a12
r9701	chr13	33123774	33123889	a12
r9805	chr13	43484997	43485100	a12
r9844	chr13	46295811	46296071	a12
r9857	chr13	46598593	46598799	a12
r9919	chr13	50208928	50209180	a12
r10039	chr13	73874032	73874208	i11
r10046	chr13	74299643	74300189	i11
r10180	chr13	91375200	91375409	i11
r10229	chr13	97028798	97028920	i11
r10281	chr13	99322291	99322542	i11
r10321	chr13	100573085	100573311	i11
r10405	chr13	111217686	111217931	i11
r10518	chr14	22783864	22784074	i11
r10613	chr14	24876082	24876242	i11
r10624	chr14	27825991	27826464	i11
r10821	chr14	51870757	51870921	i11
r10825	chr14	51979200	51979391	i11
r11021	chr14	64654297	64654742	i11
r11309	chr14	81401544	81401809	i11
r1191	chr1	71414179	71414600	i11
r12053	chr15	55179252	55179545	i11
r12263	chr15	68206056	68206216	i11
r12384	chr15	75034742	75034937	i11
r12391	chr15	75138277	75138475	i11
r12468	chr15	79930639	79930755	i11
r1248	chr1	78277293	78277653	i11
r12490	chr15	81024558	81024758	i11
r12566	chr15	85545347	85545486	i11
r12659	chr15	90402330	90402544	i11
r12722	chr15	92845262	92845431	i11
r12745	chr15	94370384	94370698	i11
r12809	chr15	99510838	99511074	i11
r13006	chr16	10821195	10821715	i11
r13136	chr16	20691588	20691719	i11
r132	chr1	6591296	6591526	i11
r13400	chr16	48562156	48562355	i11
r13476	chr16	55568923	55569370	i11
r1370	chr1	89125969	89126327	i11
r13701	chr16	71499887	71500186	i11
r13729	chr16	72932241	72932413	i11
r13737	chr16	73010215	73010390	i11
r13827	chr16	79170939	79171188	i11
r13874	chr16	81804359	81804698	i11
r13919	chr16	84700704	84700837	i11
r1401	chr1	89910877	89911017	i11
r14312	chr17	14630096	14630596	i11
r14319	chr17	15238130	15238451	i11
r1539	chr1	100531013	100531150	i11
r1587	chr1	107738963	107739603	i11
r1592	chr1	107912795	107912957	i11
r15948	chr18	44733481	44733722	i11
r1597	chr1	108049596	108049790	i11
r16253	chr18	63293308	63293508	i11
r16537	chr19	4430770	4431092	i11
r16541	chr19	4669734	4669865	i11
r1673	chr1	111200104	111200482	i11
r16822	chr19	16571374	16571481	i11
r17057	chr19	35436435	35436848	i11
r1786	chr1	116538021	116538167	i11
r17872	chr2	12797839	12798171	i11
r18134	chr2	30611608	30611961	i11
r18149	chr2	31957417	31957676	i11
r18171	chr2	33083771	33083976	i11
r18172	chr2	33084514	33084831	i11
r18250	chr2	40042079	40042242	i11
r18270	chr2	41710084	41710402	i11
r1834	chr1	119968046	119968312	i11
r1835	chr1	119987086	119987380	i11
r18567	chr2	62406609	62407151	i11
r18584	chr2	64192104	64192419	i11
r18736	chr2	71630133	71630279	i11
r1890	chr1	143665723	143665897	i11
r19137	chr2	105141301	105141404	i11
r19145	chr2	105571666	105571871	i11
r19166	chr2	108595079	108595339	i11
r19264	chr2	113857557	113857704	i11
r19421	chr2	133968492	133968773	i11
r19515	chr2	143158976	143159166	i11
r19607	chr2	149859236	149859449	i11
r19825	chr2	165015157	165015369	i11
r19844	chr2	166953601	166953805	i11
r20080	chr2	179442262	179442849	i11
r20098	chr2	181309256	181309421	i11
r20218	chr2	191274271	191274618	i11
r20379	chr2	201239642	201239880	i11
r20479	chr2	207311404	207311815	i11
r20487	chr2	207513891	207514221	i11
r20577	chr2	215793747	215794049	i11
r20770	chr2	226765499	226765863	i11
r20867	chr2	232562738	232563014	i11
r20975	chr2	238370728	238371094	i11
r21269	chr20	17538638	17538843	i11
r21326	chr20	20675177	20675493	i11
r21366	chr20	23143207	23143339	i11
r21369	chr20	23156179	23156418	i11
r21566	chr20	39358149	39358562	i11
r21908	chr21	14482244	14482517	i11
r21976	chr21	25560273	25560422	i11
r22082	chr21	33198453	33198603	i11
r22415	chr22	25669662	25669866	i11
r22741	chr22	46935851	46936027	i11
r22783	chr3	3853762	3853889	i11
r22812	chr3	5139626	5139955	i11
r22814	chr3	5194842	5195027	i11
r22819	chr3	5423127	5423793	i11
r22901	chr3	11288784	11289535	i11
r22934	chr3	13004524	13004655	i11
r23107	chr3	27094884	27095159	i11
r23181	chr3	31402213	31402521	i11
r2323	chr1	165600908	165601031	i11
r23784	chr3	67549884	67550175	i11
r23790	chr3	67940199	67940866	i11
r23908	chr3	85535614	85535877	i11
r23971	chr3	99484994	99485221	i11
r23985	chr3	100072762	100072974	i11
r24050	chr3	105386076	105386255	i11
r2408	chr1	169371573	169371676	i11
r24097	chr3	107987028	107987172	i11
r24472	chr3	131794844	131795090	i11
r24698	chr3	149145412	149145757	i11
r24714	chr3	149751644	149751833	i11
r24726	chr3	150385361	150385725	i11
r24817	chr3	156460443	156460690	i11
r24896	chr3	161035237	161035477	i11
r24934	chr3	167876571	167876847	i11
r24993	chr3	171771328	171771509	i11
r25214	chr3	186706161	186706458	i11
r2522	chr1	175737525	175737742	i11
r25232	chr3	187041886	187042030	i11
r25331	chr3	190609794	190610092	i11
r25332	chr3	190616792	190616999	i11
r25368	chr3	193461756	193461920	i11
r2539	chr1	178300000	178300194	i11
r25397	chr3	194612394	194612581	i11
r25714	chr4	22413468	22413862	i11
r25727	chr4	23091706	23091960	i11
r25750	chr4	25860978	25861189	i11
r25875	chr4	40621752	40621972	i11
r25935	chr4	47838543	47838675	i11
r26188	chr4	77007378	77007941	i11
r26198	chr4	77196854	77197179	i11
r26237	chr4	80139766	80139977	i11
r2627	chr1	182956261	182956435	i11
r26362	chr4	88275886	88276071	i11
r2640	chr1	183604946	183605095	i11
r26413	chr4	94342725	94342973	i11
r26420	chr4	94519040	94519277	i11
r26437	chr4	95606716	95607094	i11
r26438	chr4	95798101	95798471	i11
r26489	chr4	101960507	101960706	i11
r26530	chr4	105014698	105014957	i11
r26561	chr4	106909476	106909812	i11
r26585	chr4	108540852	108541100	i11
r26648	chr4	112931067	112931302	i11
r26681	chr4	117983633	117983847	i11
r26730	chr4	121698348	121698469	i11
r26786	chr4	124152120	124152485	i11
r2686	chr1	185373869	185374288	i11
r26976	chr4	145177886	145178090	i11
r26995	chr4	145808378	145808739	i11
r2716	chr1	191121178	191121458	i11
r27185	chr4	158810210	158810455	i11
r27196	chr4	159204580	159204799	i11
r27222	chr4	163591717	163592059	i11
r27225	chr4	163611245	163611457	i11
r27228	chr4	163622058	163622210	i11
r27351	chr4	175406006	175406286	i11
r27632	chr5	14723716	14723906	i11
r27702	chr5	29139221	29139434	i11
r27741	chr5	33675990	33676251	i11
r27847	chr5	40429821	40430141	i11
r2795	chr1	199009588	199009802	i11
r28049	chr5	57166281	57166627	i11
r28065	chr5	58410528	58410750	i11
r28285	chr5	74433505	74433691	i11
r28428	chr5	83712126	83712266	i11
r28553	chr5	95048735	95048940	i11
r28645	chr5	102283564	102283735	i11
r28646	chr5	102286580	102286801	i11
r28647	chr5	102295028	102295221	i11
r28737	chr5	111116554	111116885	i11
r28741	chr5	111472568	111472841	i11
r28767	chr5	113194798	113194964	i11
r28795	chr5	115309832	115310051	i11
r28807	chr5	115941133	115941382	i11
r28821	chr5	117888701	117889004	i11
r29028	chr5	132883333	132883547	i11
r29091	chr5	136012152	136012363	i11
r29092	chr5	136012436	136012642	i11
r29168	chr5	140342406	140342509	i11
r29273	chr5	144191595	144191713	i11
r29459	chr5	157248942	157249391	i11
r29526	chr5	160799144	160799538	i11
r29547	chr5	165139748	165140044	i11
r29553	chr5	165574862	165575126	i11
r29554	chr5	165630239	165630645	i11
r29596	chr5	170287590	170287929	i11
r29738	chr5	178334953	178335193	i11
r29901	chr6	5142929	5143285	i11
r29913	chr6	5672304	5672457	i11
r30094	chr6	15621744	15621960	i11
r30149	chr6	18330499	18330712	i11
r30152	chr6	18391107	18391293	i11
r30153	chr6	18401179	18401465	i11
r30202	chr6	24283352	24283460	i11
r30408	chr6	30496603	30496937	i11
r30666	chr6	40962298	40962607	i11
r30785	chr6	45445863	45446040	i11
r30818	chr6	47162920	47163136	i11
r30920	chr6	56370666	56370886	i11
r30992	chr6	70289400	70289543	i11
r31069	chr6	75300597	75300823	i11
r31071	chr6	75609010	75609272	i11
r31087	chr6	79544999	79545340	i11
r31175	chr6	87710159	87710395	i11
r31277	chr6	97825260	97825508	i11
r31399	chr6	108888879	108889058	i11
r31631	chr6	125974322	125974560	i11
r31729	chr6	132133437	132133569	i11
r31837	chr6	137224915	137225219	i11
r31867	chr6	137928327	137928562	i11
r31923	chr6	140774194	140774508	i11
r31924	chr6	140857781	140858107	i11
r32011	chr6	146596014	146596364	i11
r32017	chr6	146876440	146877051	i11
r32163	chr6	154218439	154218642	i11
r32171	chr6	154341524	154341735	i11
r32173	chr6	154356598	154357051	i11
r32276	chr6	159056055	159056397	i11
r32637	chr7	8444046	8444182	i11
r32638	chr7	8482002	8482520	i11
r32639	chr7	8601218	8601454	i11
r32656	chr7	12222876	12223173	i11
r32681	chr7	14751534	14751853	i11
r32683	chr7	15889592	15889869	i11
r32750	chr7	18495144	18495379	i11
r32780	chr7	20307175	20307407	i11
r32812	chr7	22569886	22570222	i11
r32909	chr7	29110061	29110298	i11
r32959	chr7	31890356	31890623	i11
r33472	chr7	85104476	85104692	i11
r33516	chr7	88314157	88314504	i11
r33550	chr7	91287361	91287779	i11
r33570	chr7	92621771	92621889	i11
r33577	chr7	92731809	92732038	i11
r33584	chr7	93146785	93146975	i11
r33600	chr7	94048446	94048596	i11
r33765	chr7	102122171	102122344	i11
r33811	chr7	104961021	104961305	i11
r33819	chr7	105268232	105268335	i11
r33891	chr7	109843447	109843837	i11
r33973	chr7	117119502	117119804	i11
r34165	chr7	134174735	134175087	i11
r3421	chr1	232620366	232620647	i11
r34277	chr7	141425737	141426024	i11
r34304	chr7	142568607	142568737	i11
r34306	chr7	142583463	142583775	i11
r34570	chr8	8384111	8384305	i11
r34665	chr8	13224553	13224889	i11
r34699	chr8	17850435	17850542	i11
r34948	chr8	33691105	33691380	i11
r35051	chr8	42037770	42038043	i11
r35064	chr8	42346960	42347086	i11
r35092	chr8	47513511	47513773	i11
r35295	chr8	65881292	65881522	i11
r35417	chr8	76580861	76581234	i11
r35507	chr8	85456985	85457194	i11
r3553	chr1	241611131	241611270	i11
r35532	chr8	89759246	89759475	i11
r35557	chr8	92426528	92426802	i11
r35641	chr8	96979142	96979719	i11
r35642	chr8	96989068	96989386	i11
r35665	chr8	99224843	99225028	i11
r3572	chr1	243287764	243288004	i11
r35764	chr8	104669102	104669252	i11
r35781	chr8	107068786	107068970	i11
r35782	chr8	107296520	107296699	i11
r35785	chr8	107344290	107344520	i11
r35788	chr8	107454861	107455013	i11
r35791	chr8	107495856	107496142	i11
r35796	chr8	107703429	107703675	i11
r35809	chr8	108475807	108476027	i11
r35864	chr8	115582018	115582157	i11
r35920	chr8	118328974	118329268	i11
r35955	chr8	120803365	120804066	i11
r36044	chr8	125342104	125342491	i11
r36110	chr8	129971709	129971828	i11
r36112	chr8	129995155	129995411	i11
r36343	chr9	2570638	2571033	i11
r36429	chr9	7094869	7095367	i11
r3657	chr1	248805990	248806139	i11
r36824	chr9	70392245	70392430	i11
r36841	chr9	70934936	70935270	i11
r36849	chr9	71638745	71639041	i11
r36877	chr9	72478281	72478494	i11
r36930	chr9	76717581	76717894	i11
r37354	chr9	107751898	107752025	i11
r37503	chr9	120584129	120584360	i11
r37791	chr9	137688838	137689027	i11
r37880	chrX	10190427	10190683	i11
r37903	chrX	12906556	12906675	i11
r37939	chrX	15321571	15321762	i11
r38004	chrX	20362588	20363263	i11
r38057	chrX	35699654	35700018	i11
r38065	chrX	37076035	37076157	i11
r38290	chrX	56763895	56764024	i11
r38323	chrX	65673916	65674044	i11
r38339	chrX	66046815	66047259	i11
r3844	chr10	11171417	11171564	i11
r38506	chrX	100606773	100607015	i11
r38613	chrX	109721084	109721289	i11
r38616	chrX	109830797	109831168	i11
r38821	chrX	133646815	133646977	i11
r3905	chr10	13633775	13634053	i11
r3938	chr10	15290287	15290456	i11
r3994	chr10	21300457	21300887	i11
r4130	chr10	30427322	30427514	i11
r4431	chr10	60515350	60515457	i11
r4447	chr10	60974867	60975057	i11
r4466	chr10	62046113	62046260	i11
r4843	chr10	88064882	88065271	i11
r4865	chr10	89242982	89243219	i11
r4888	chr10	90842846	90843010	i11
r5034	chr10	100183593	100183774	i11
r5141	chr10	103612562	103612684	i11
r5228	chr10	110324853	110325061	i11
r5261	chr10	112426167	112426435	i11
r5355	chr10	119271493	119271634	i11
r5702	chr11	6201033	6201245	i11
r5911	chr11	16779461	16779829	i11
r5925	chr11	17209365	17209502	i11
r5998	chr11	21565004	21565279	i11
r6001	chr11	22304490	22304711	i11
r6290	chr11	58999318	58999588	i11
r6712	chr11	78350645	78350916	i11
r6778	chr11	86141617	86141977	i11
r6849	chr11	93541314	93541469	i11
r6916	chr11	96464792	96464983	i11
r7039	chr11	110497385	110497627	i11
r7082	chr11	112175270	112175600	i11
r7387	chr11	126345849	126346245	i11
r7510	chr11	134250391	134250499	i11
r7881	chr12	20507172	20507467	i11
r7951	chr12	26150046	26150221	i11
r8132	chr12	46661522	46661677	i11
r8347	chr12	55619447	55619975	i11
r8478	chr12	62841976	62842228	i11
r8486	chr12	63021191	63021515	i11
r8490	chr12	63410334	63410559	i11
r8526	chr12	65656968	65657183	i11
r8593	chr12	68932275	68932697	i11
r8599	chr12	69341448	69341673	i11
r8628	chr12	71772762	71773033	i11
r8653	chr12	75511063	75511300	i11
r8660	chr12	75974406	75974657	i11
r8675	chr12	76569820	76570005	i11
r8689	chr12	77995522	77995697	i11
r8771	chr12	89156411	89156627	i11
r8772	chr12	89160753	89160866	i11
r880	chr1	48245107	48245506	i11
r881	chr1	48470155	48470405	i11
r8813	chr12	89960705	89960947	i11
r8882	chr12	94164783	94164999	i11
r8884	chr12	94173036	94173226	i11
r8899	chr12	94644156	94644654	i11
r8953	chr12	98424800	98425099	i11
r8982	chr12	100554678	100554809	i11
r9078	chr12	106740287	106740495	i11
r9281	chr12	119902083	119902395	i11
r9349	chr12	122646810	122647138	i11
r9416	chr12	125223008	125223178	i11
r9663	chr13	30713175	30713493	i11
r9745	chr13	40116128	40116300	i11
r980	chr1	55702137	55702284	i11
r982	chr1	56249349	56249616	i11
r9901	chr13	48980088	48980232	i11
r9977	chr13	58655196	58655427	i11
r10513	chr14	22570241	22570719	i1
r10566	chr14	23953598	23954271	i1
r1080	chr1	63773879	63774258	i1
r11083	chr14	68210815	68211332	i1
r11367	chr14	89430612	89431181	i1
r11707	chr15	31353248	31353652	i1
r11714	chr15	31435404	31435754	i1
r11751	chr15	34583548	34583865	i1
r11802	chr15	38671676	38672032	i1
r11858	chr15	41283728	41284089	i1
r11866	chr15	41660277	41660839	i1
r11899	chr15	43330256	43330773	i1
r12289	chr15	70099580	70099833	i1
r12858	chr16	370490	370768	i1
r12887	chr16	1929612	1929978	i1
r12897	chr16	2136061	2136405	i1
r12900	chr16	2268015	2268574	i1
r12915	chr16	2868179	2868632	i1
r12918	chr16	2882525	2883431	i1
r12920	chr16	2911655	2912062	i1
r12925	chr16	2980399	2980816	i1
r12940	chr16	3305254	3305775	i1
r12959	chr16	4416502	4416958	i1
r12972	chr16	4847042	4847863	i1
r13252	chr16	28879737	28880109	i1
r13259	chr16	28974580	28974965	i1
r13269	chr16	29790418	29790917	i1
r13277	chr16	29926108	29926544	i1
r13358	chr16	34581202	34581835	i1
r13359	chr16	34582157	34582284	i1
r13360	chr16	34583600	34583769	i1
r13670	chr16	69565728	69566338	i1
r13673	chr16	69754794	69755132	i1
r13930	chr16	85027463	85027929	i1
r13954	chr16	85898799	85899189	i1
r13985	chr16	88569954	88570500	i1
r13992	chr16	88663027	88663541	i1
r13995	chr16	88700944	88701283	i1
r14002	chr16	88856896	88857200	i1
r14116	chr17	3668424	3668947	i1
r14145	chr17	4833141	4833557	i1
r14195	chr17	7329347	7329859	i1
r14206	chr17	7484106	7484995	i1
r14309	chr17	14359351	14359824	i1
r14326	chr17	15651694	15652048	i1
r14388	chr17	19362586	19363132	i1
r14433	chr17	26603816	26604177	i1
r14466	chr17	28576843	28577192	i1
r14476	chr17	28854693	28855183	i1
r14481	chr17	28951400	28951938	i1
r14649	chr17	38869628	38870149	i1
r14670	chr17	39730256	39730696	i1
r14671	chr17	39754134	39754847	i1
r14724	chr17	42017324	42017721	i1
r14741	chr17	42609138	42609800	i1
r14786	chr17	44218554	44218896	i1
r14837	chr17	47188905	47189679	i1
r14913	chr17	50094957	50095493	i1
r15246	chr17	73192405	73192788	i1
r15285	chr17	74776210	74776536	i1
r16115	chr18	56651096	56651754	i1
r16424	chr19	488674	489364	i1
r16427	chr19	680293	681152	i1
r16428	chr19	796886	797506	i1
r16452	chr19	1205464	1205824	i1
r16468	chr19	1848669	1848898	i1
r16511	chr19	3035593	3035941	i1
r16523	chr19	3626586	3627260	i1
r16551	chr19	5680460	5681090	i1
r16553	chr19	5720023	5720875	i1
r16555	chr19	5791059	5791337	i1
r16556	chr19	5977883	5978530	i1
r16573	chr19	6767335	6767993	i1
r16645	chr19	10333431	10333790	i1
r16657	chr19	10565914	10566247	i1
r16770	chr19	13986384	13986790	i1
r16799	chr19	15432680	15433005	i1
r16810	chr19	16118547	16118942	i1
r16821	chr19	16542282	16542813	i1
r16849	chr19	17523146	17523628	i1
r16850	chr19	17539645	17540126	i1
r16875	chr19	18304607	18305069	i1
r16888	chr19	18571540	18571912	i1
r17087	chr19	36114831	36115881	i1
r17147	chr19	38618796	38619310	i1
r17154	chr19	38849318	38849601	i1
r17160	chr19	38930334	38931069	i1
r17172	chr19	39435840	39436263	i1
r17178	chr19	39846175	39846546	i1
r17189	chr19	40348283	40348802	i1
r17191	chr19	40404146	40404497	i1
r17196	chr19	40443071	40443486	i1
r17227	chr19	41397268	41397917	i1
r17265	chr19	42423455	42423784	i1
r17320	chr19	45001683	45002324	i1
r17352	chr19	45730780	45731119	i1
r17353	chr19	45769391	45769733	i1
r17358	chr19	45902537	45903227	i1
r17361	chr19	46346890	46347228	i1
r17398	chr19	48321284	48321553	i1
r17402	chr19	48333814	48334212	i1
r17429	chr19	48872192	48872572	i1
r17441	chr19	49118699	49119386	i1
r17449	chr19	49443425	49443949	i1
r17451	chr19	49474122	49474472	i1
r17495	chr19	50476315	50476633	i1
r17547	chr19	52570102	52570660	i1
r17550	chr19	52638188	52638641	i1
r17561	chr19	53333489	53333854	i1
r17565	chr19	53431684	53432222	i1
r17586	chr19	54159686	54160121	i1
r17631	chr19	55675010	55675348	i1
r17677	chr19	58098139	58098600	i1
r17732	chr2	3651605	3652005	i1
r17877	chr2	15142141	15142604	i1
r17959	chr2	20618027	20618399	i1
r18055	chr2	27217281	27217553	i1
r18282	chr2	42133123	42133437	i1
r18387	chr2	47521082	47521583	i1
r1883	chr1	143246885	143247170	i1
r19356	chr2	127081014	127081294	i1
r1970	chr1	150363626	150364302	i1
r20213	chr2	191150905	191151239	i1
r20593	chr2	216109091	216109500	i1
r20651	chr2	218880086	218880566	i1
r20709	chr2	222912128	222912568	i1
r2071	chr1	153990507	153990991	i1
r2078	chr1	154272184	154272740	i1
r20849	chr2	231662073	231662659	i1
r2104	chr1	155017470	155017787	i1
r21060	chr20	1325231	1325565	i1
r21086	chr20	2652261	2652805	i1
r2139	chr1	155934299	155934732	i1
r21448	chr20	31723330	31724067	i1
r21500	chr20	35454623	35455357	i1
r21563	chr20	38961980	38962786	i1
r21654	chr20	45972319	45972642	i1
r21857	chr20	62954214	62954548	i1
r21862	chr20	63520425	63520864	i1
r21872	chr20	63707626	63708086	i1
r22061	chr21	31558948	31559630	i1
r2222	chr1	160031700	160032240	i1
r22324	chr22	20016824	20017023	i1
r22385	chr22	23838794	23839494	i1
r22494	chr22	31662018	31662430	i1
r22620	chr22	40856535	40857290	i1
r22622	chr22	41091235	41092031	i1
r22625	chr22	41286059	41286579	i1
[truncated: 101 more rows]
